# Supplementary material for: Inversion variants in human and primate genomes
Source: PubMed Central journal article supplement — Genome Res. 2018 Jun;28(6):910–20. doi: 10.1101/gr.234831.118 (PMC5991517; doi:10.1101/gr.234831.118), 2018-06
Supplement: supp_gr.234831.118_Supplemental_Fig_S1-S5.pdf [file supp_gr.234831.118_Supplemental_Fig_S1-S5.pdf]

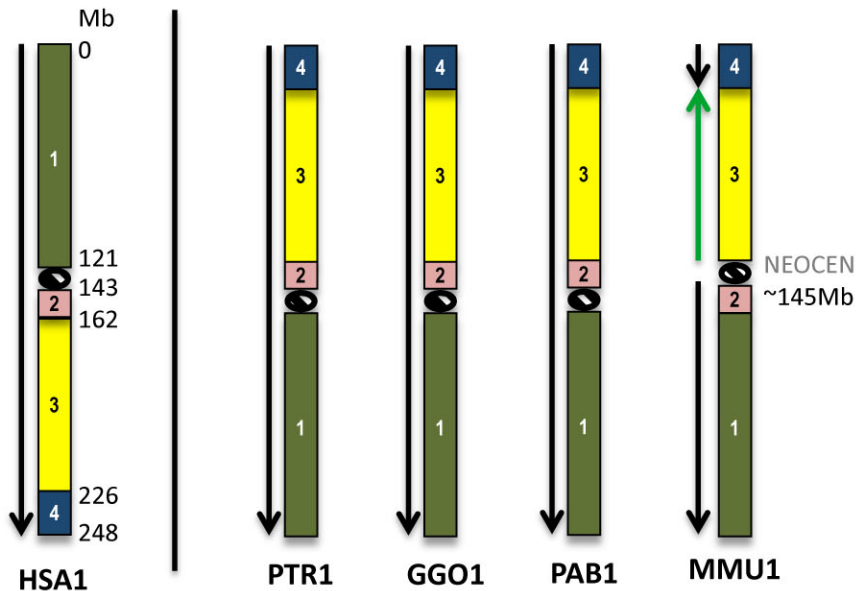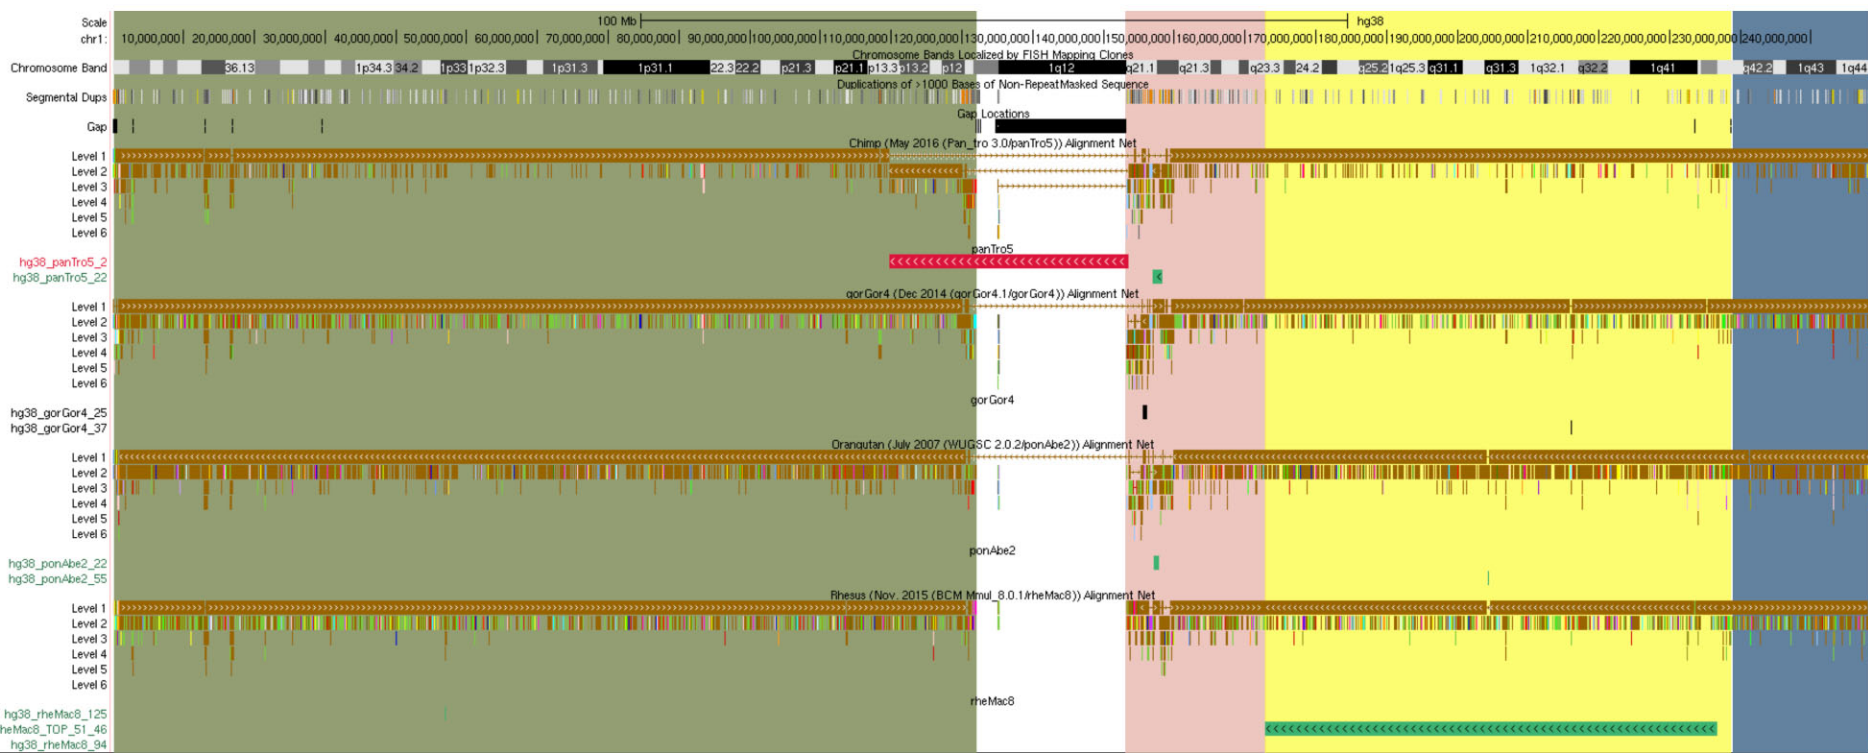

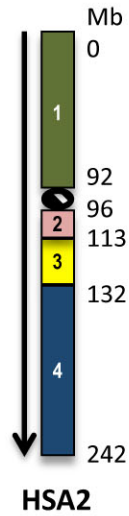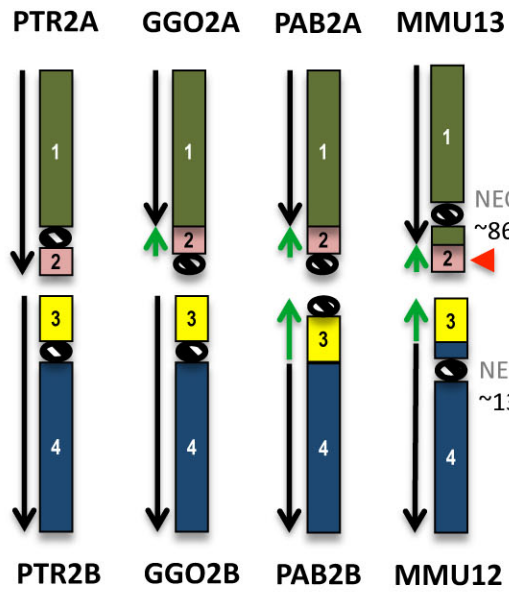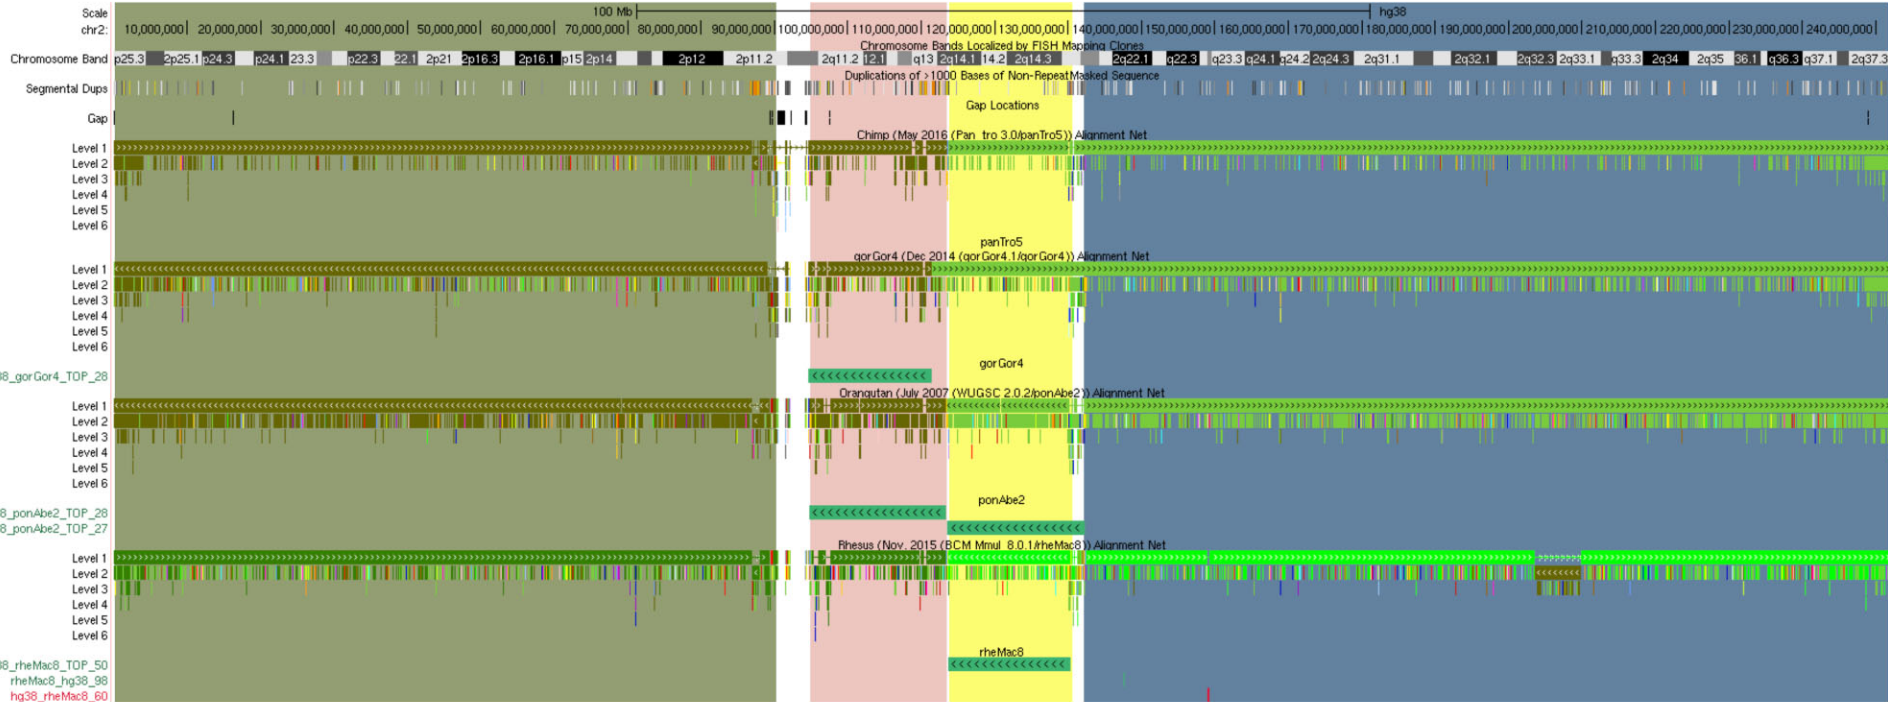

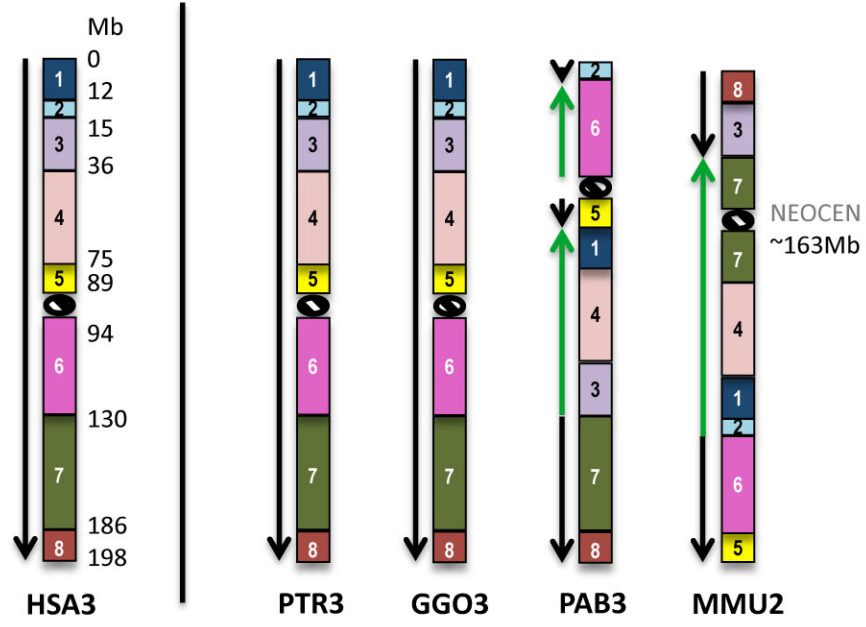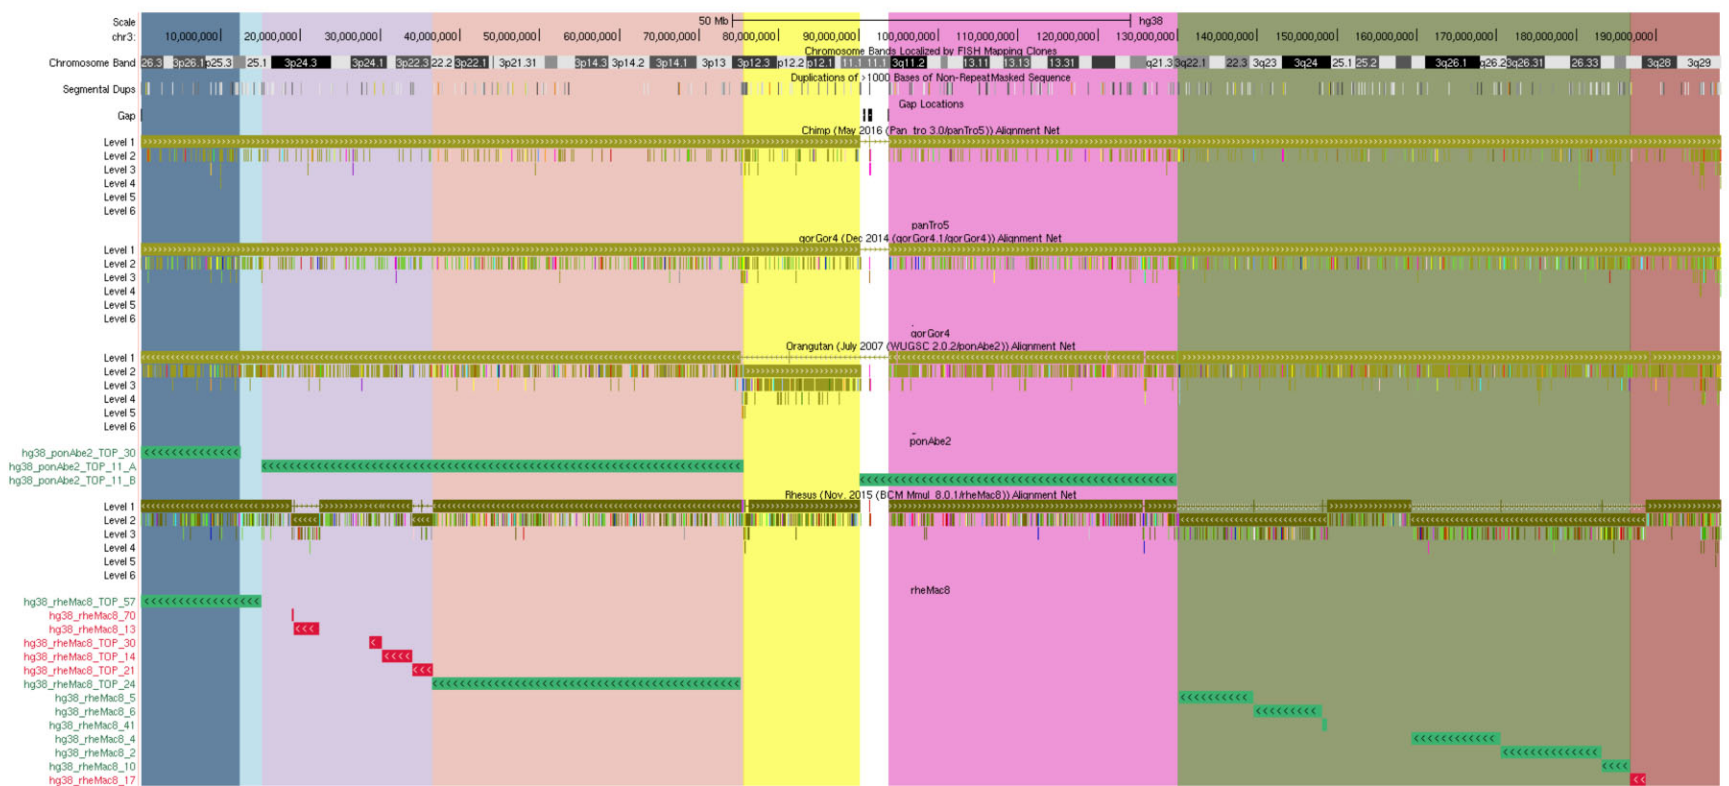

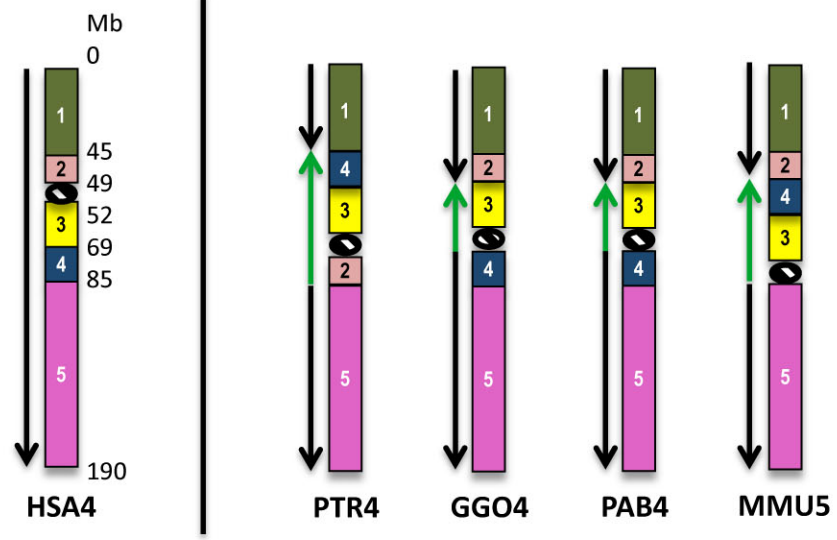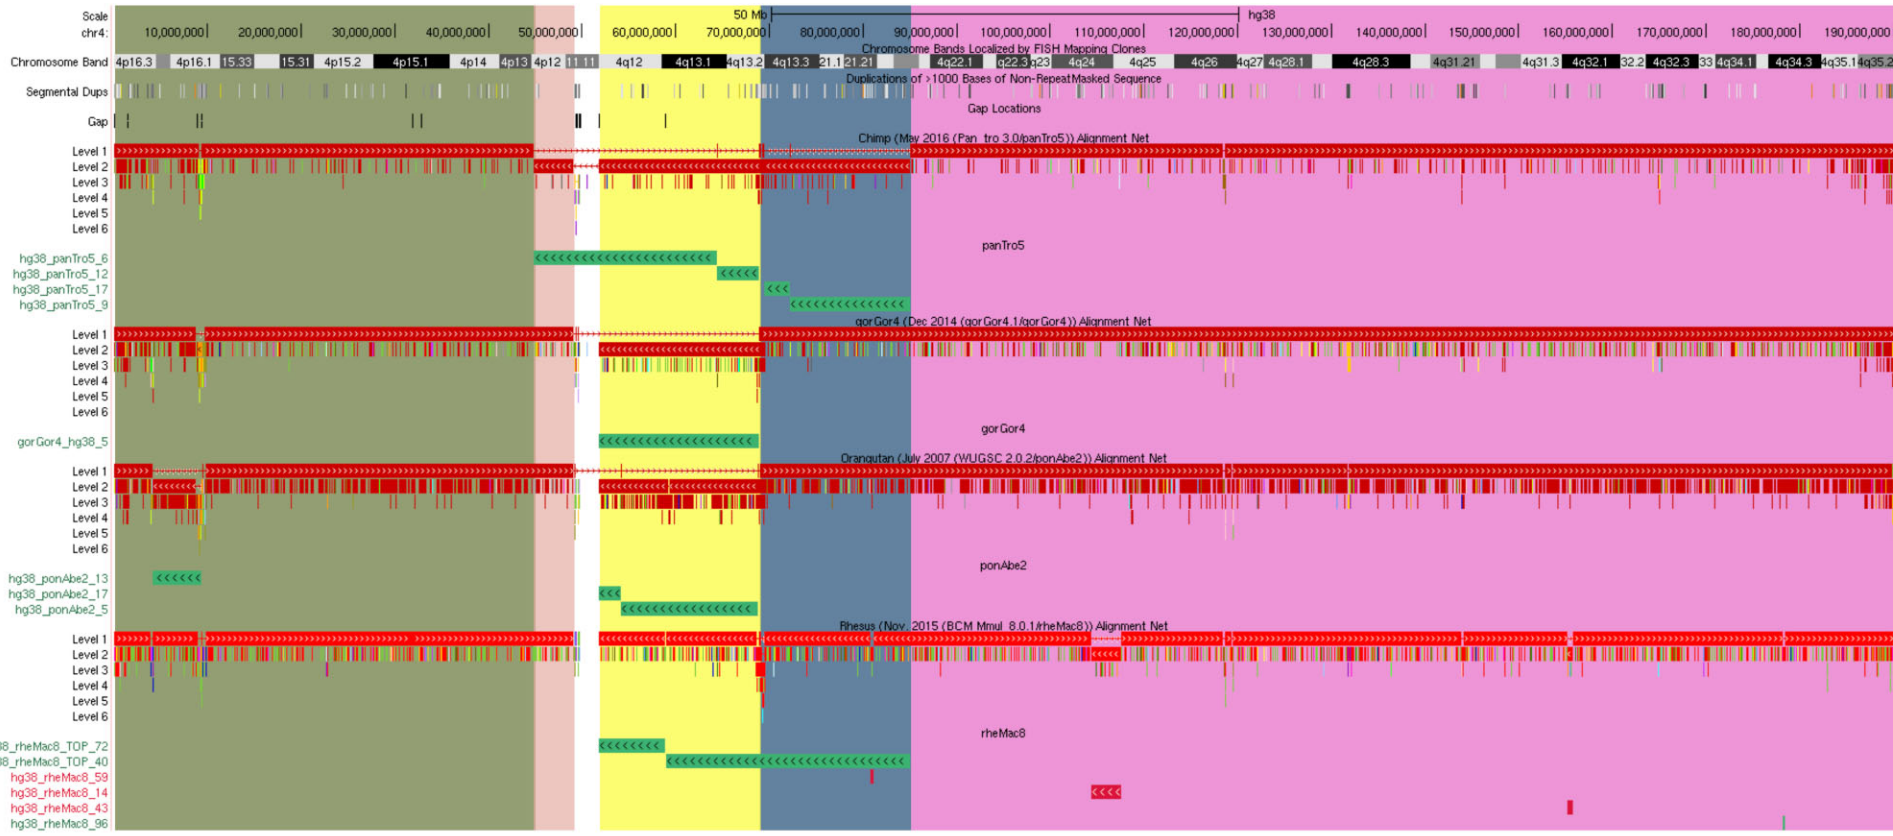

# GGO17

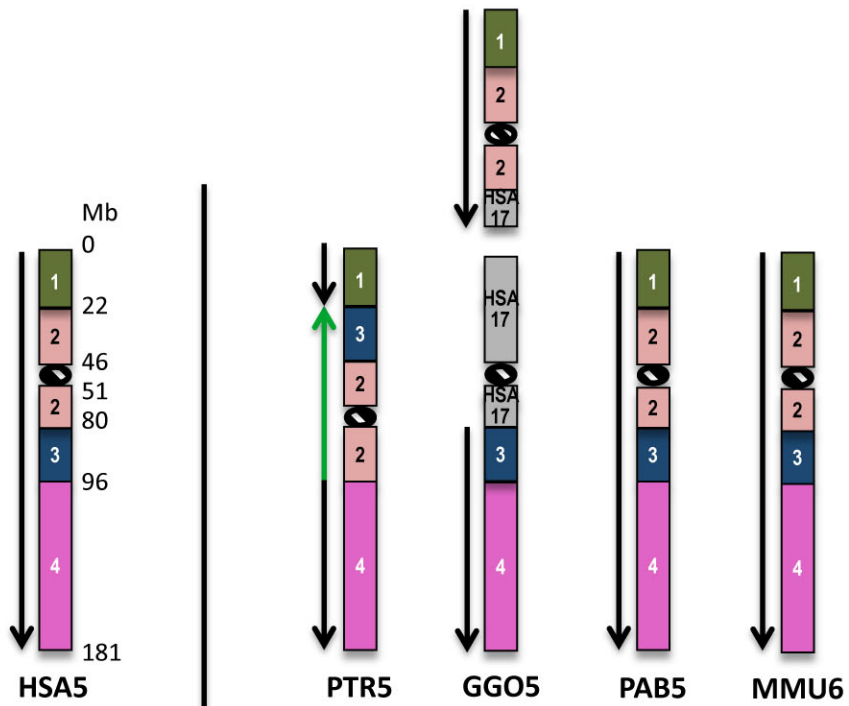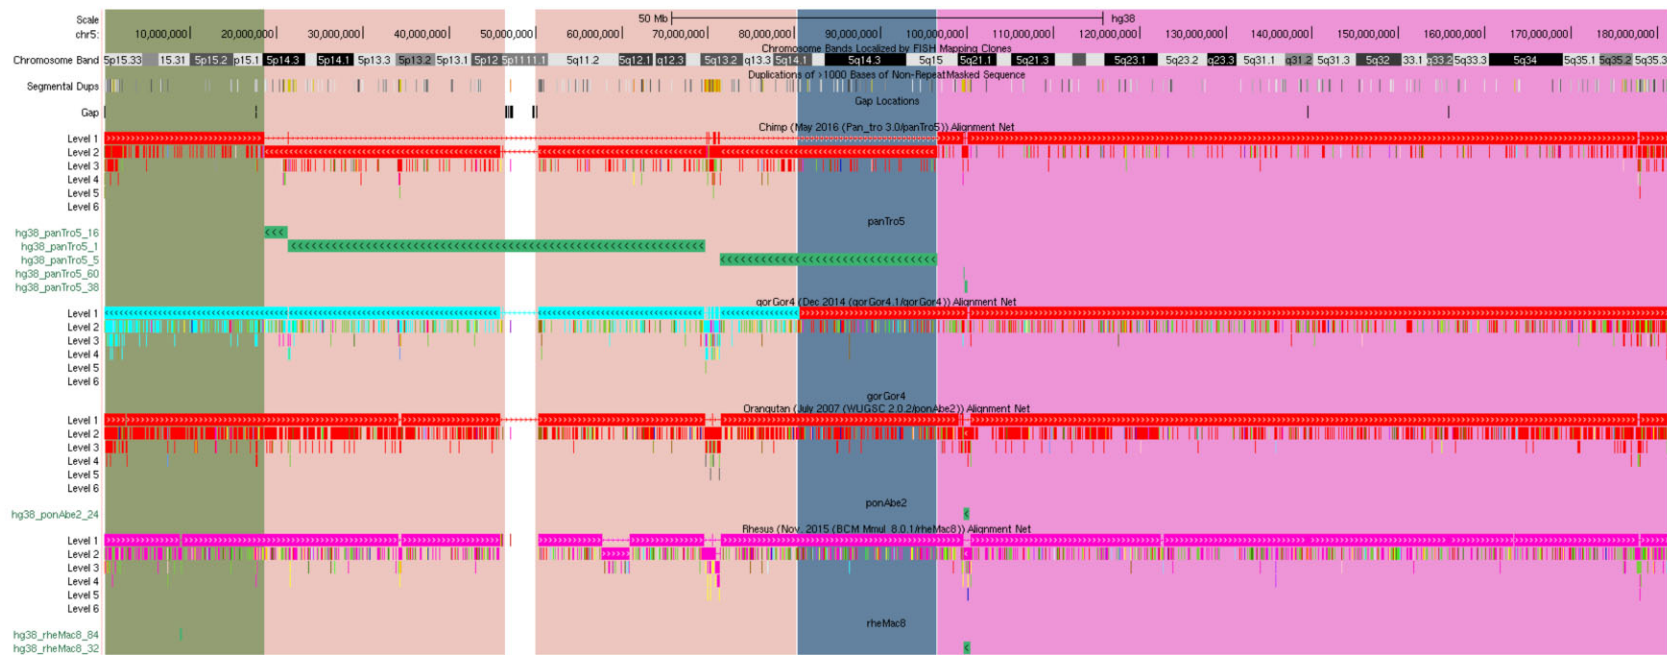

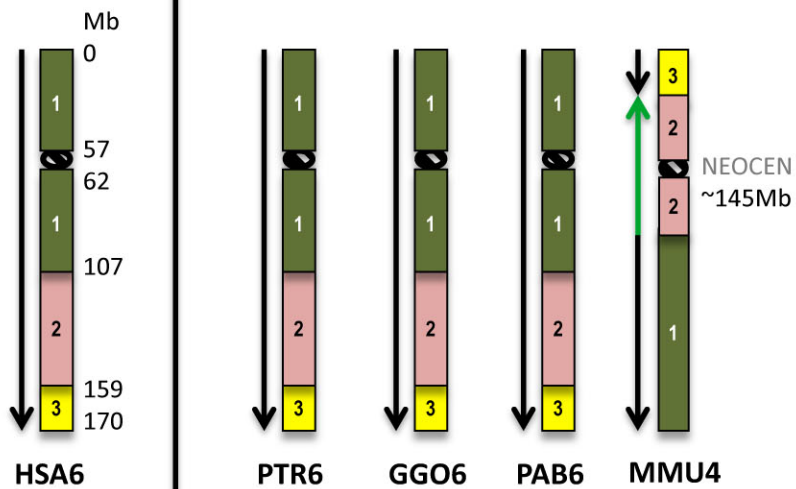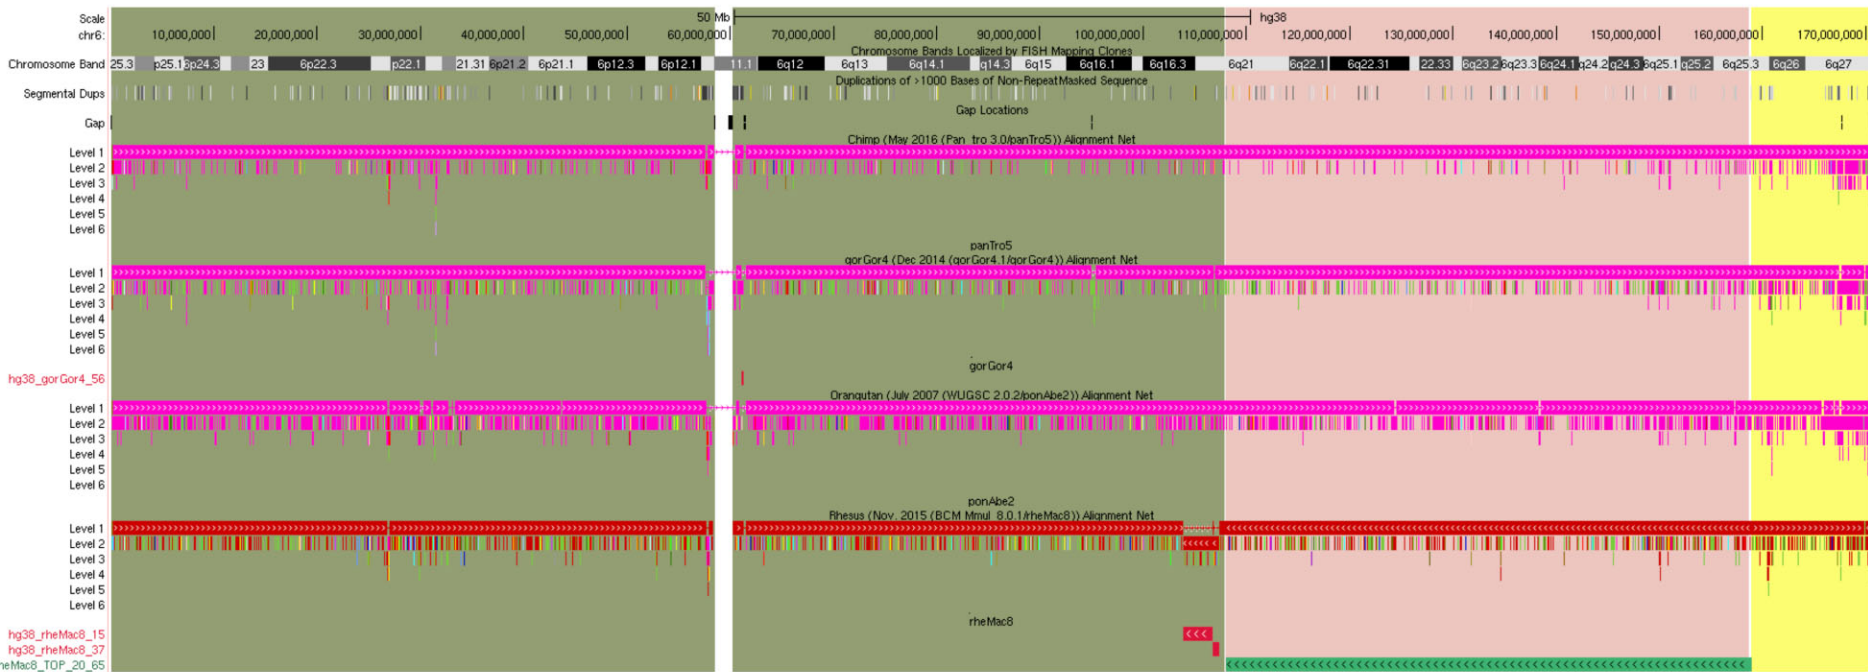

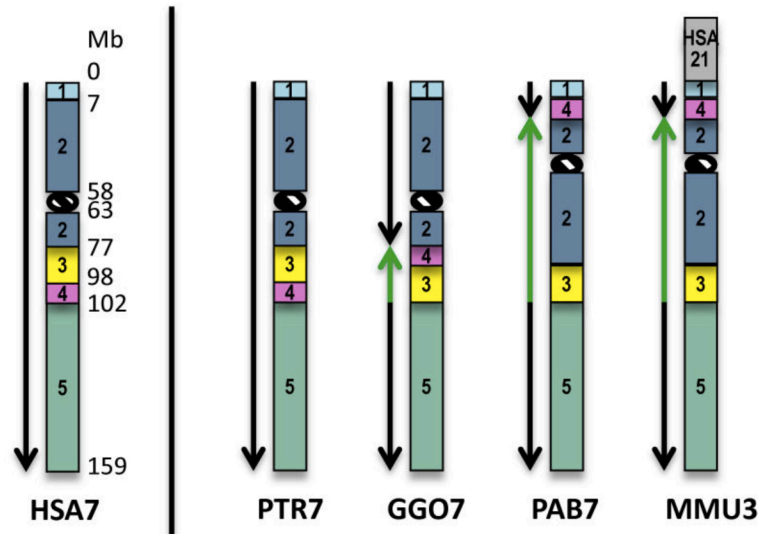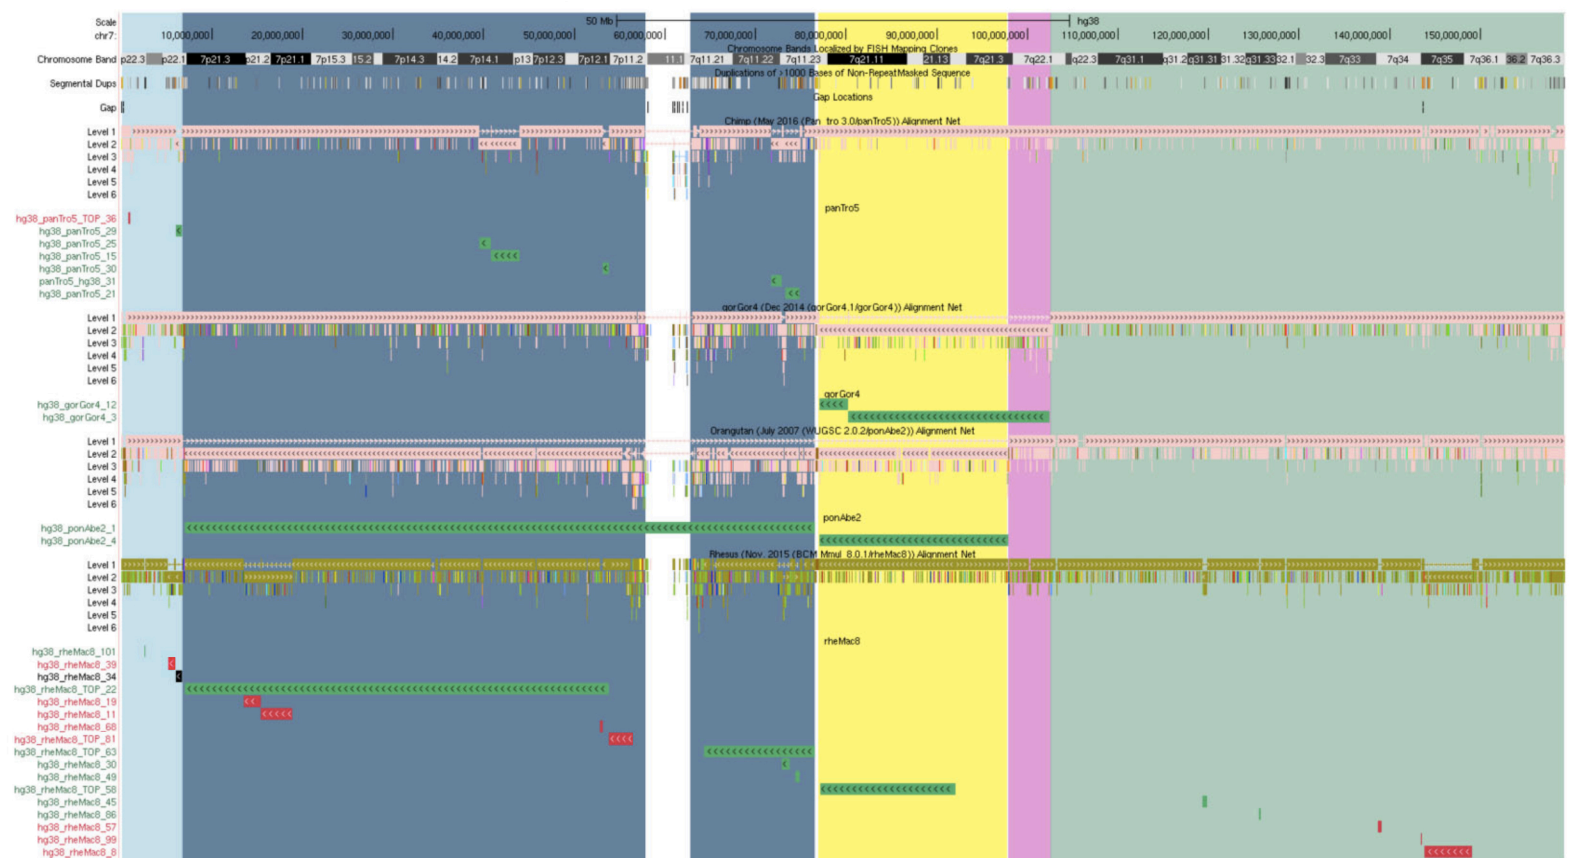

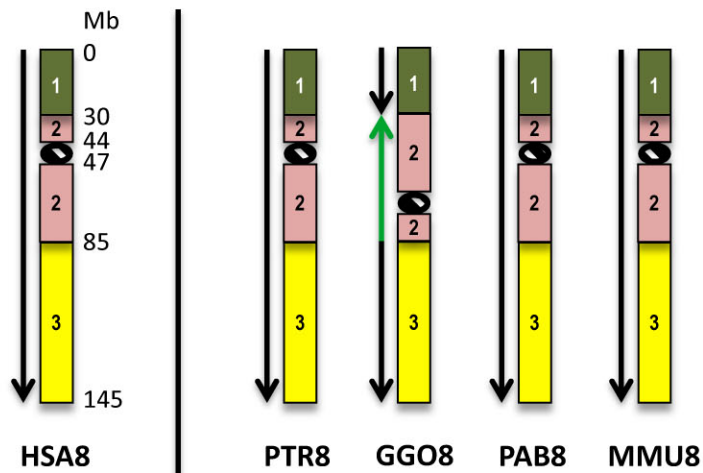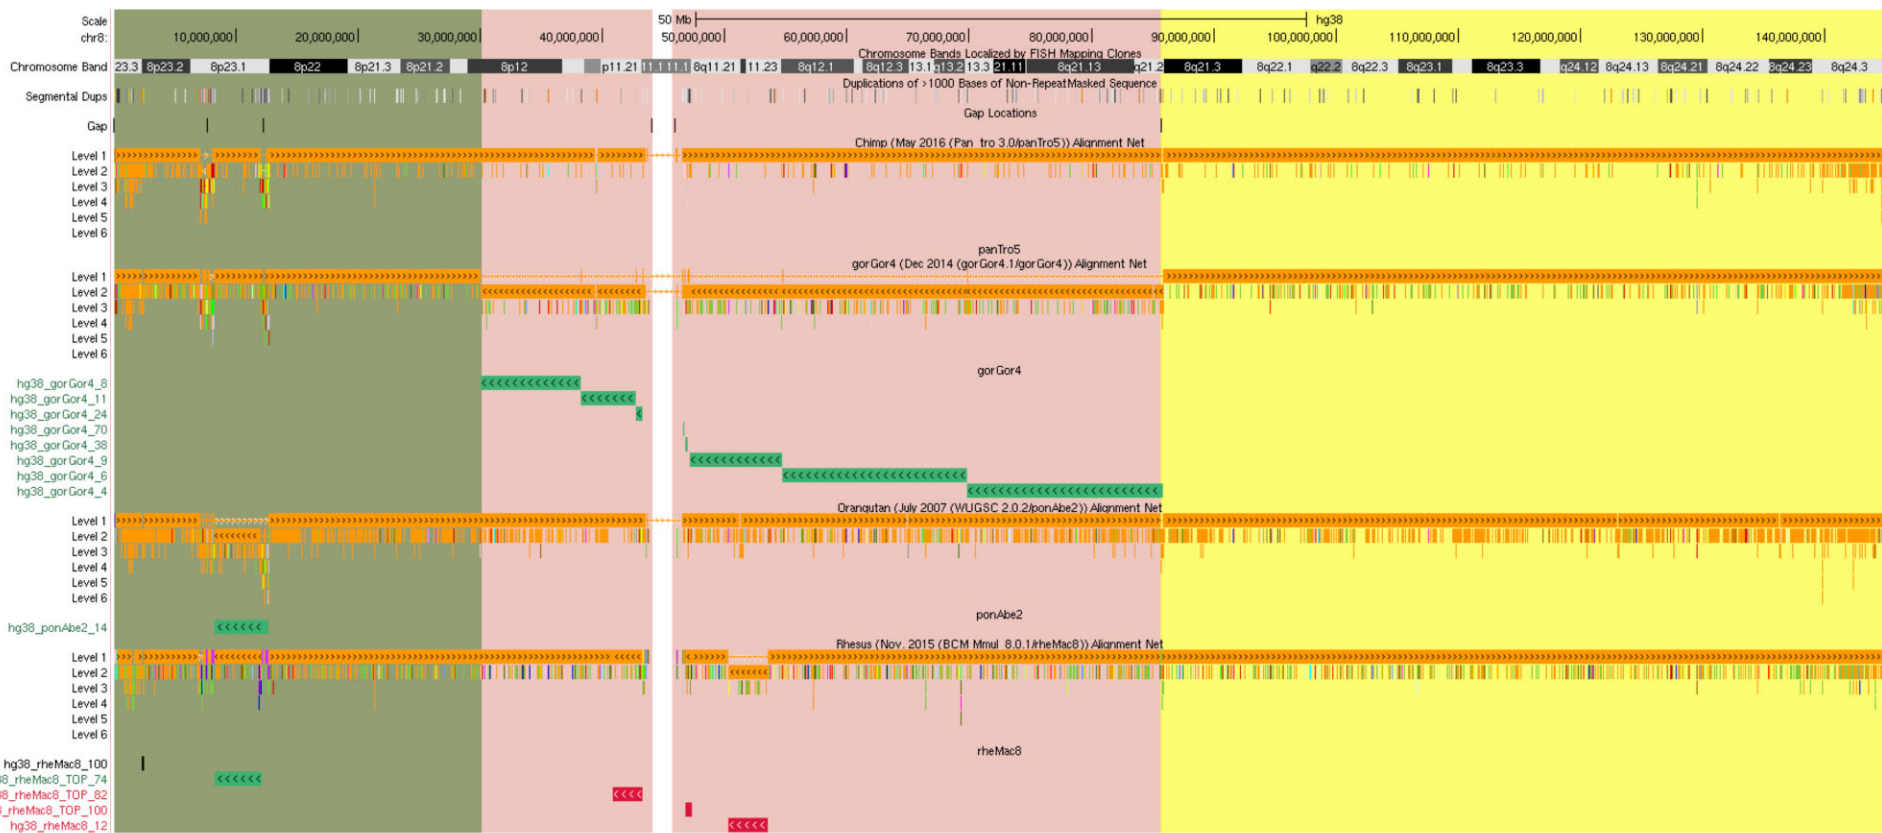



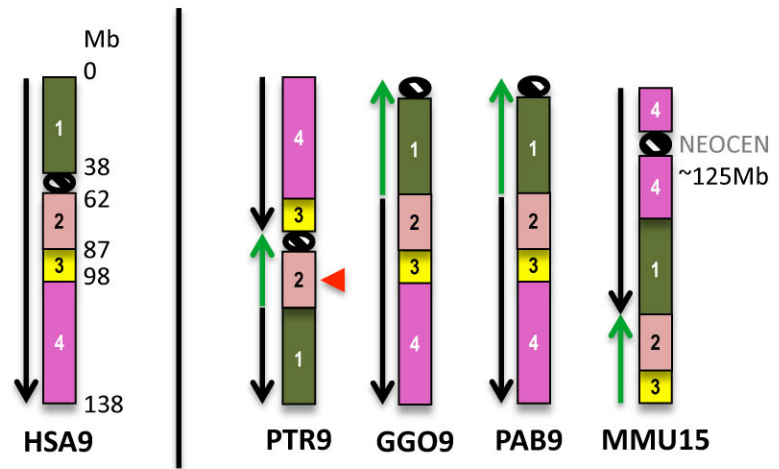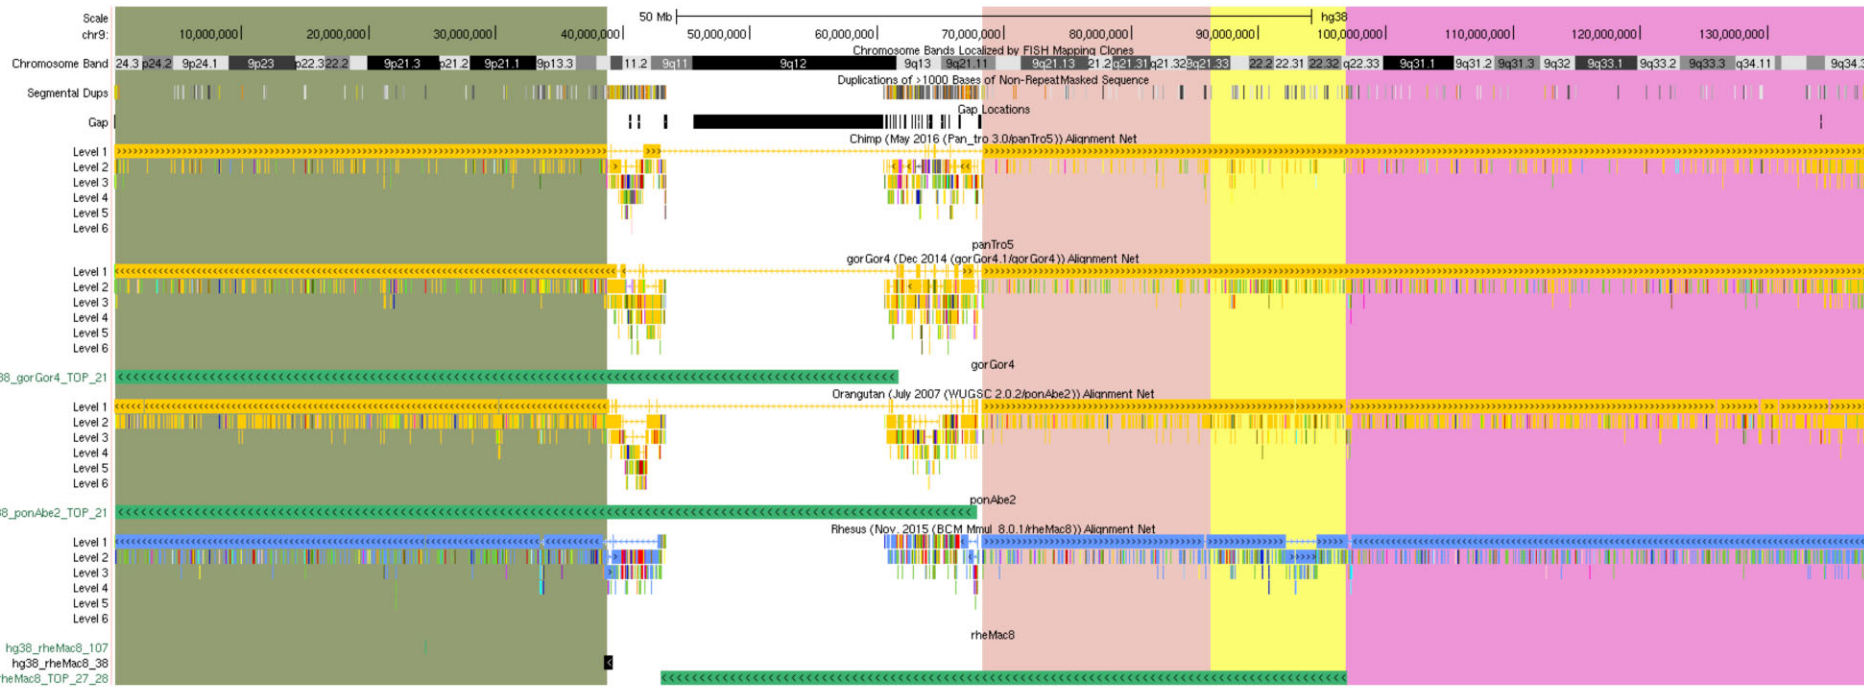

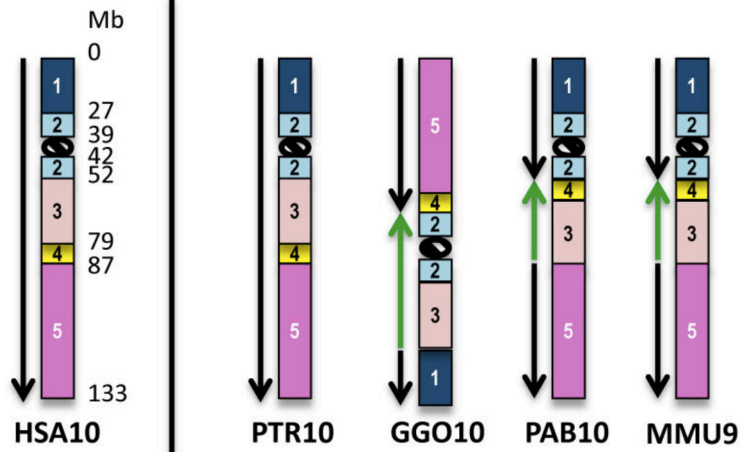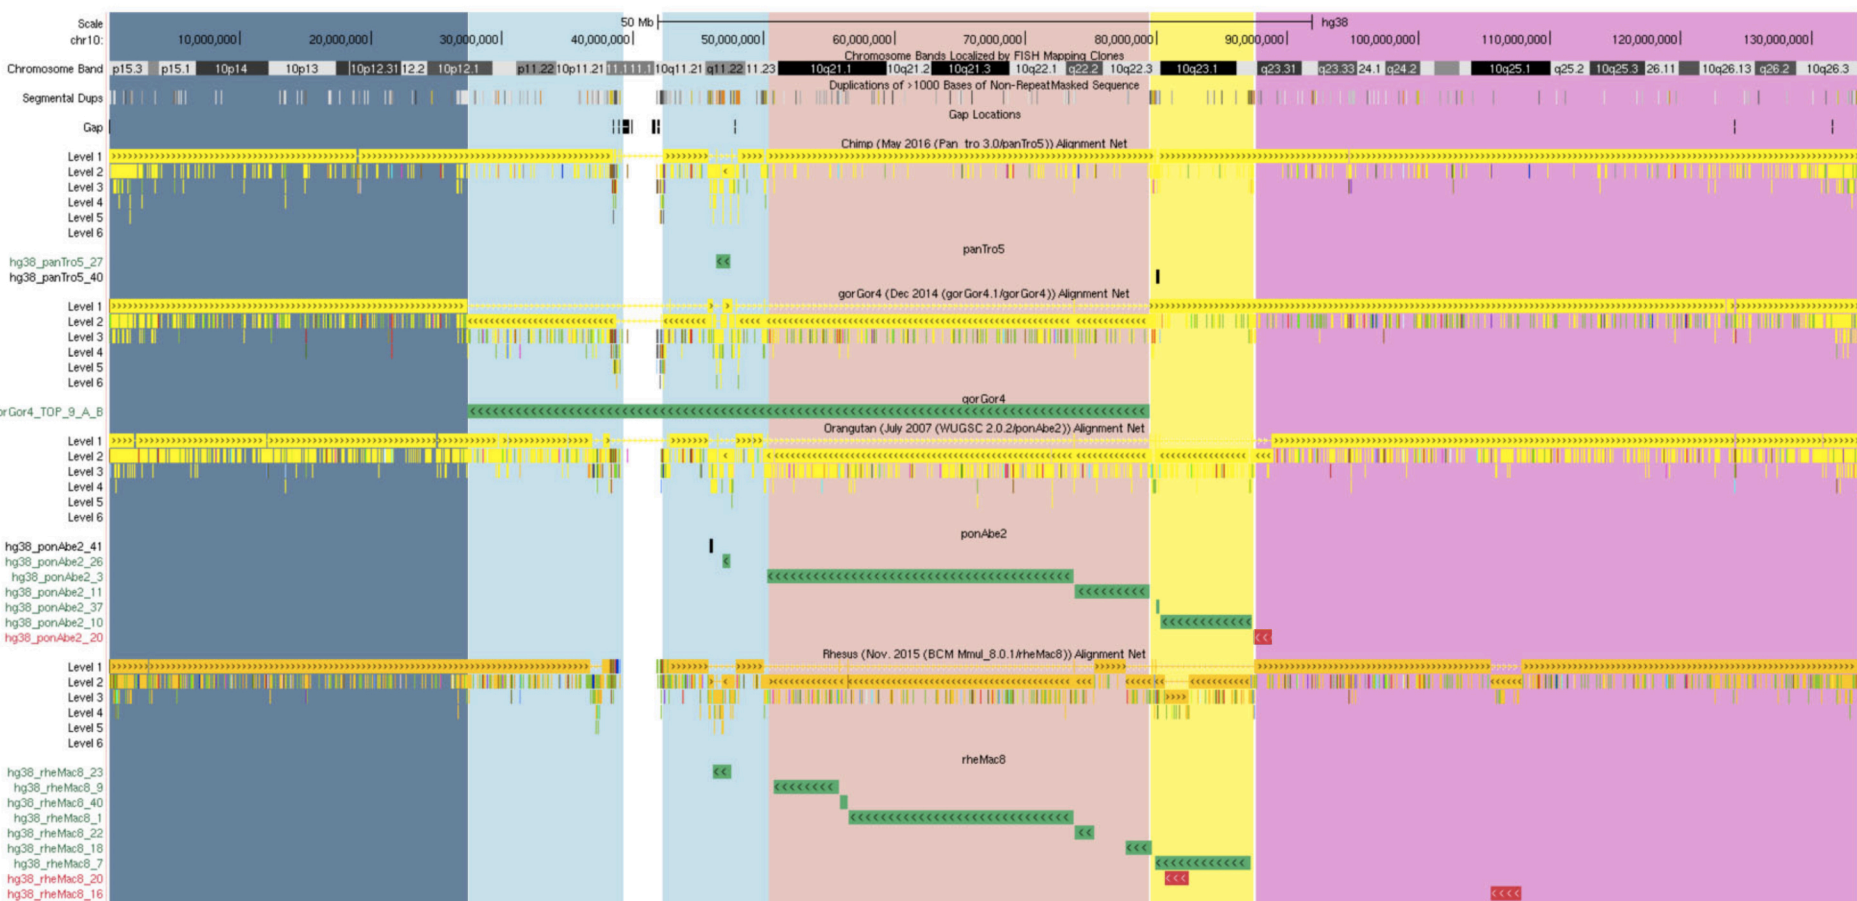

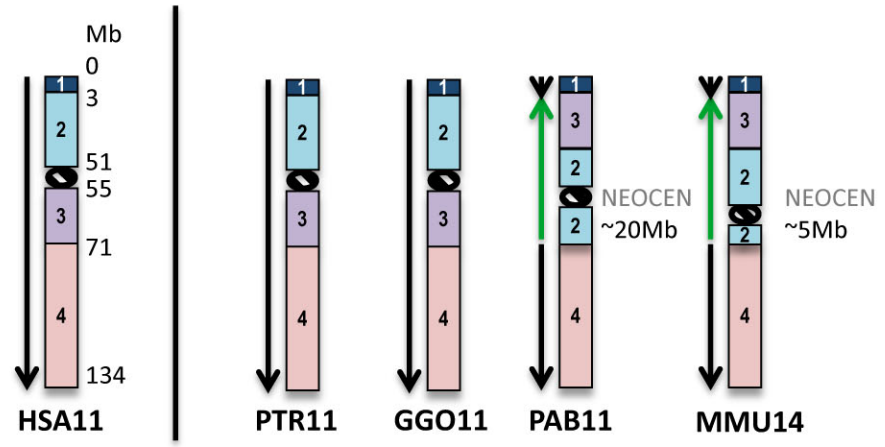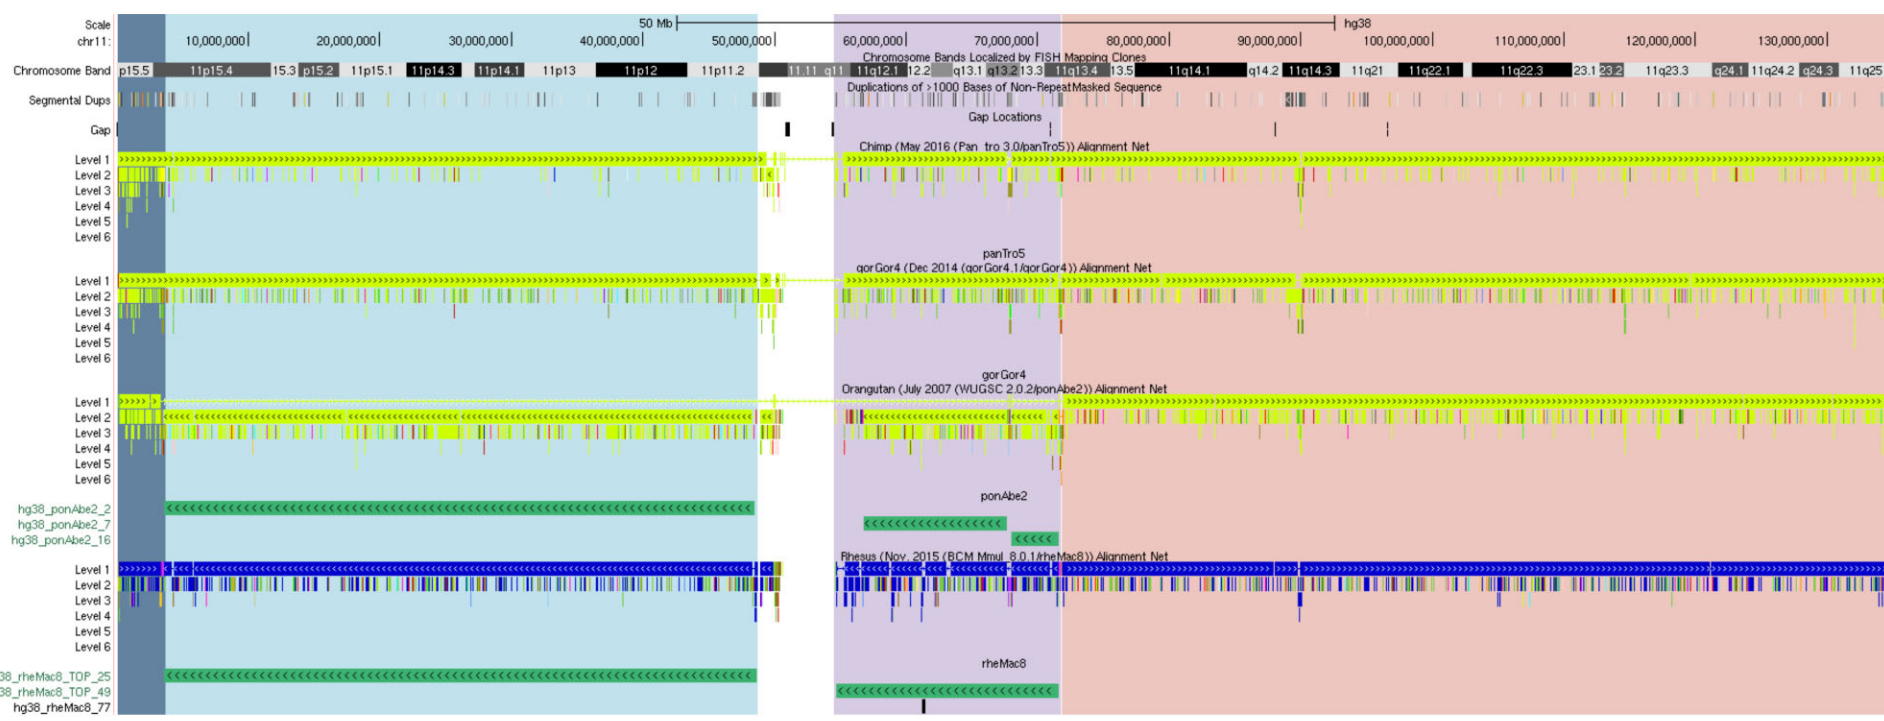

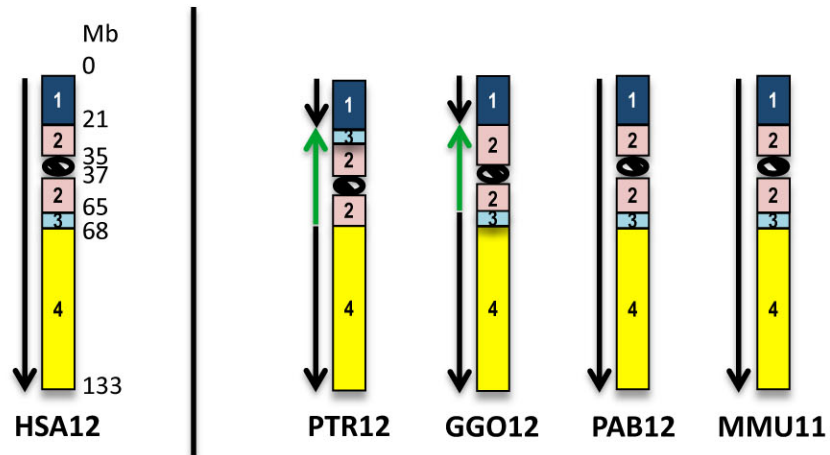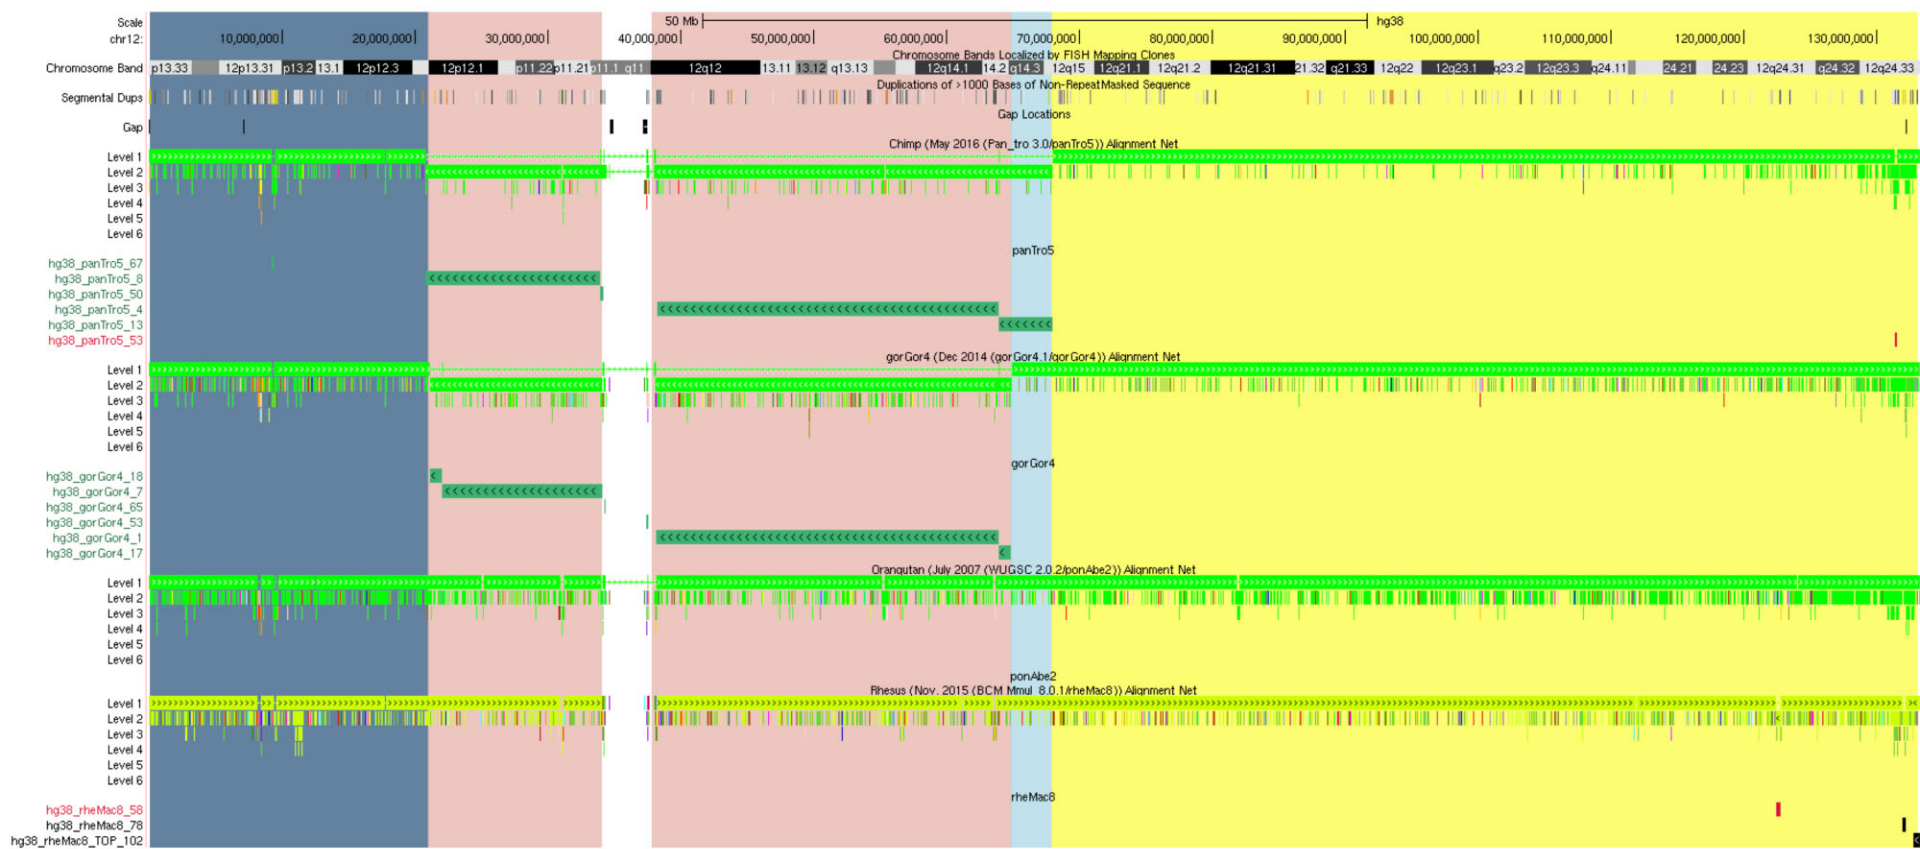

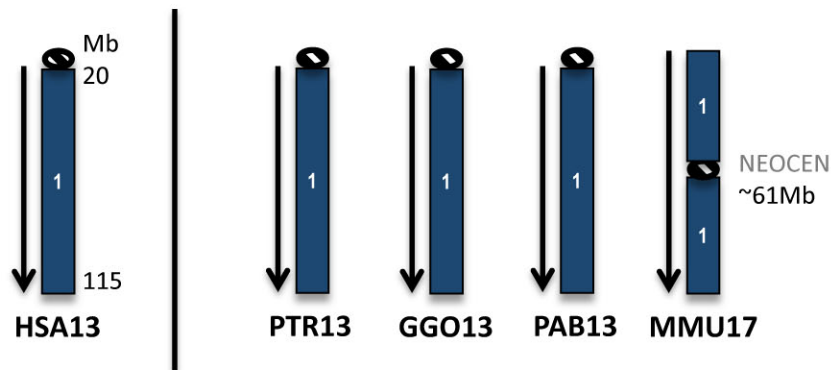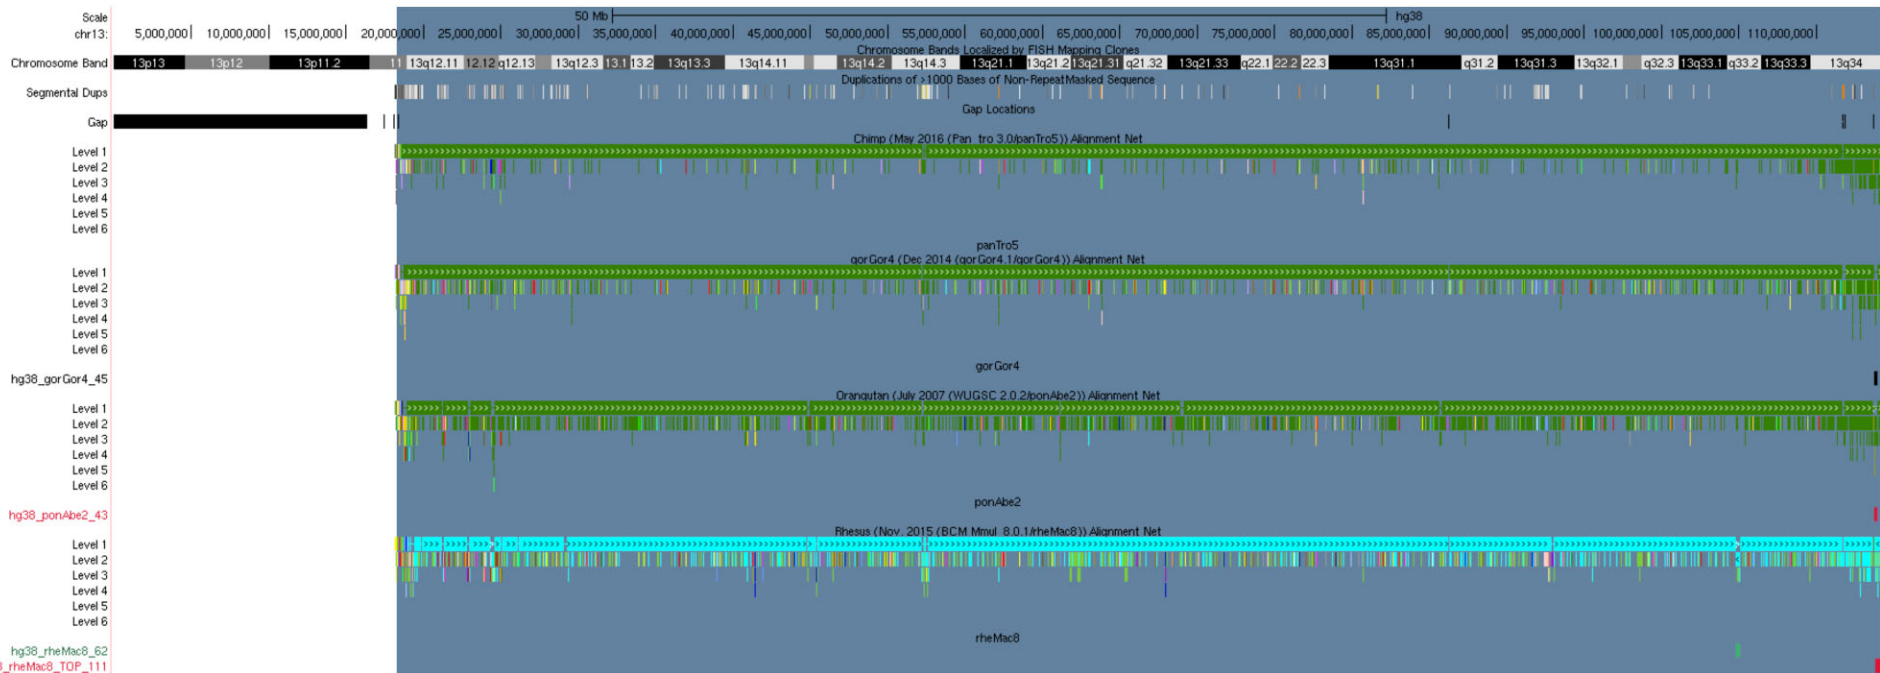

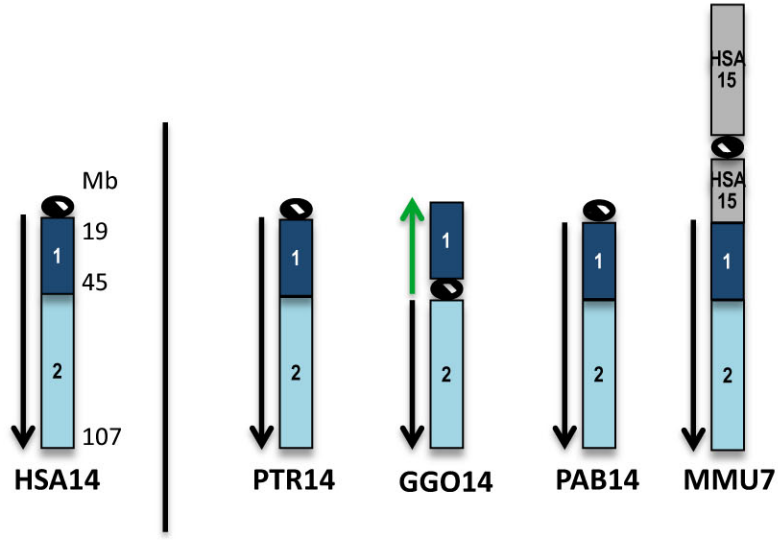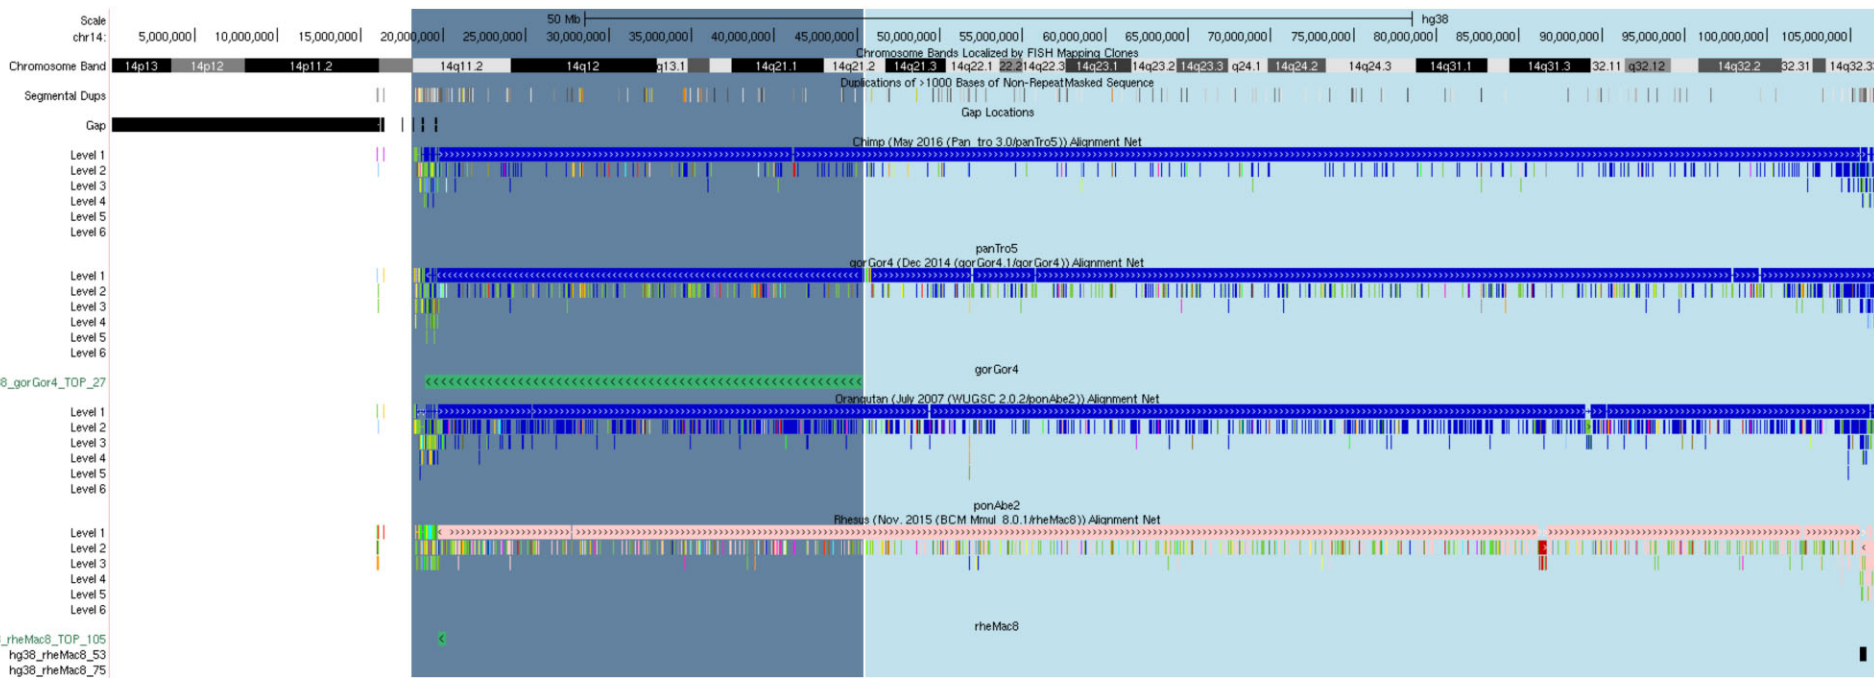

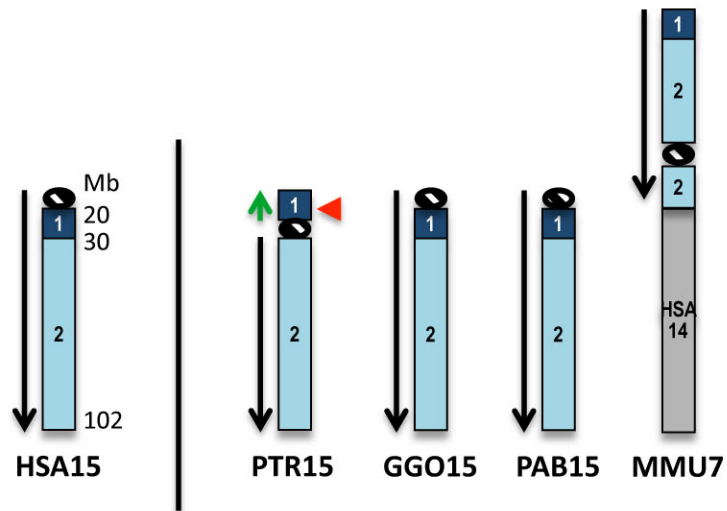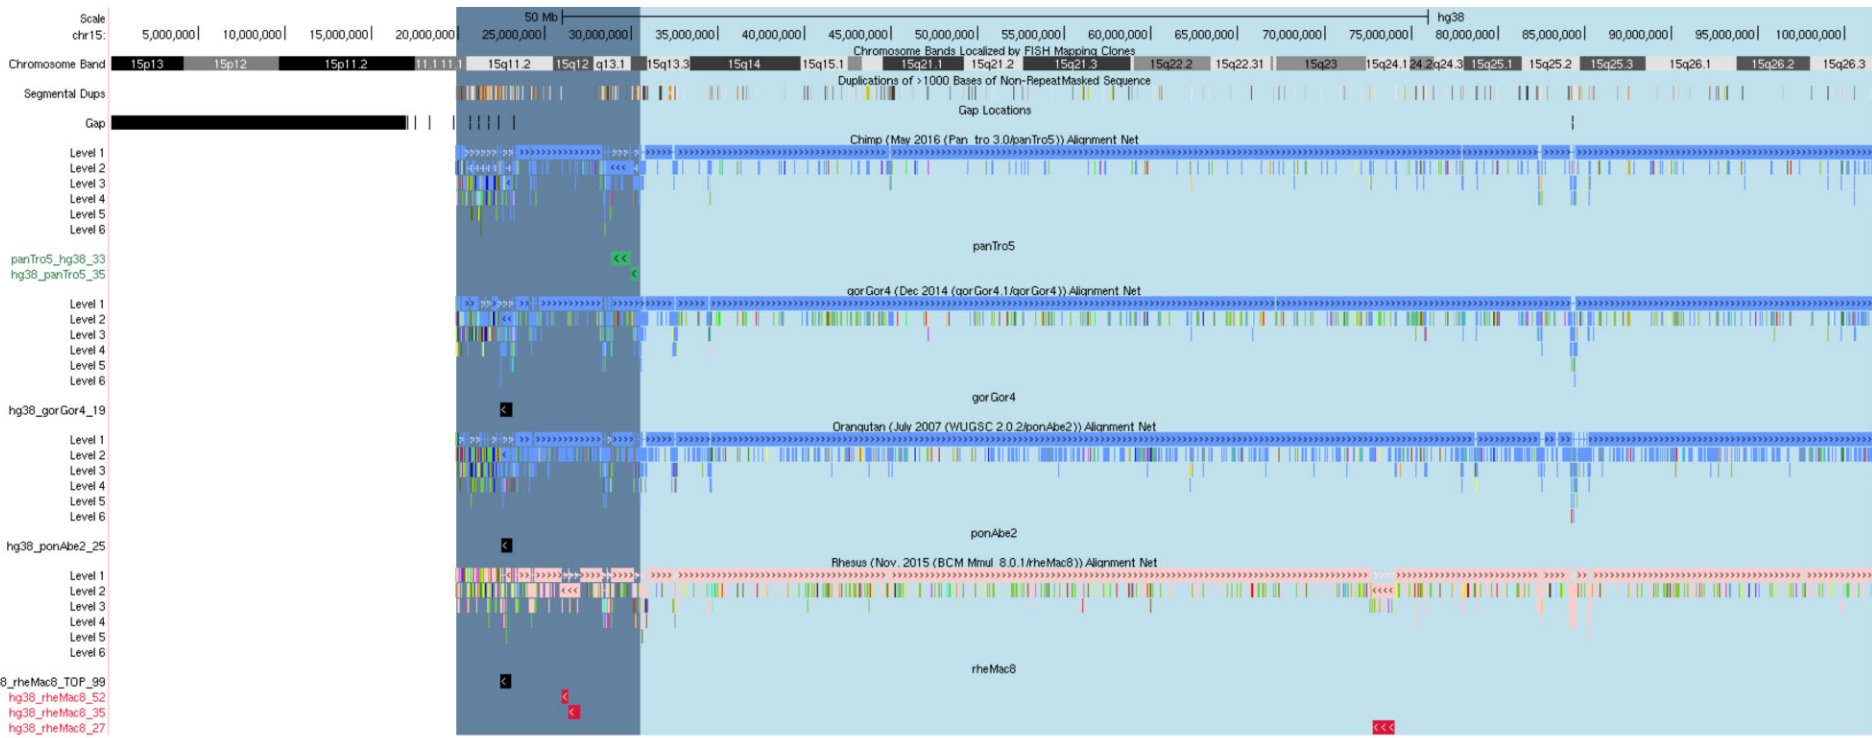

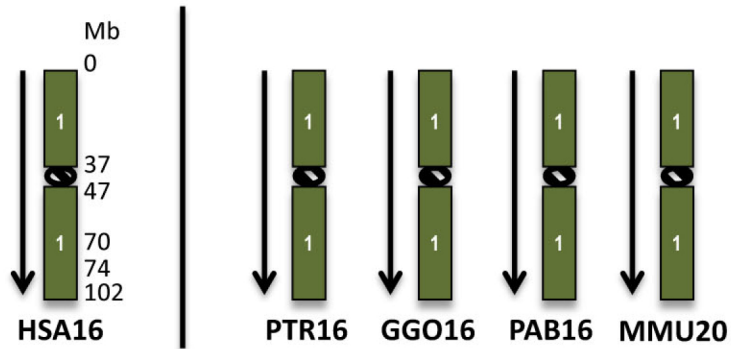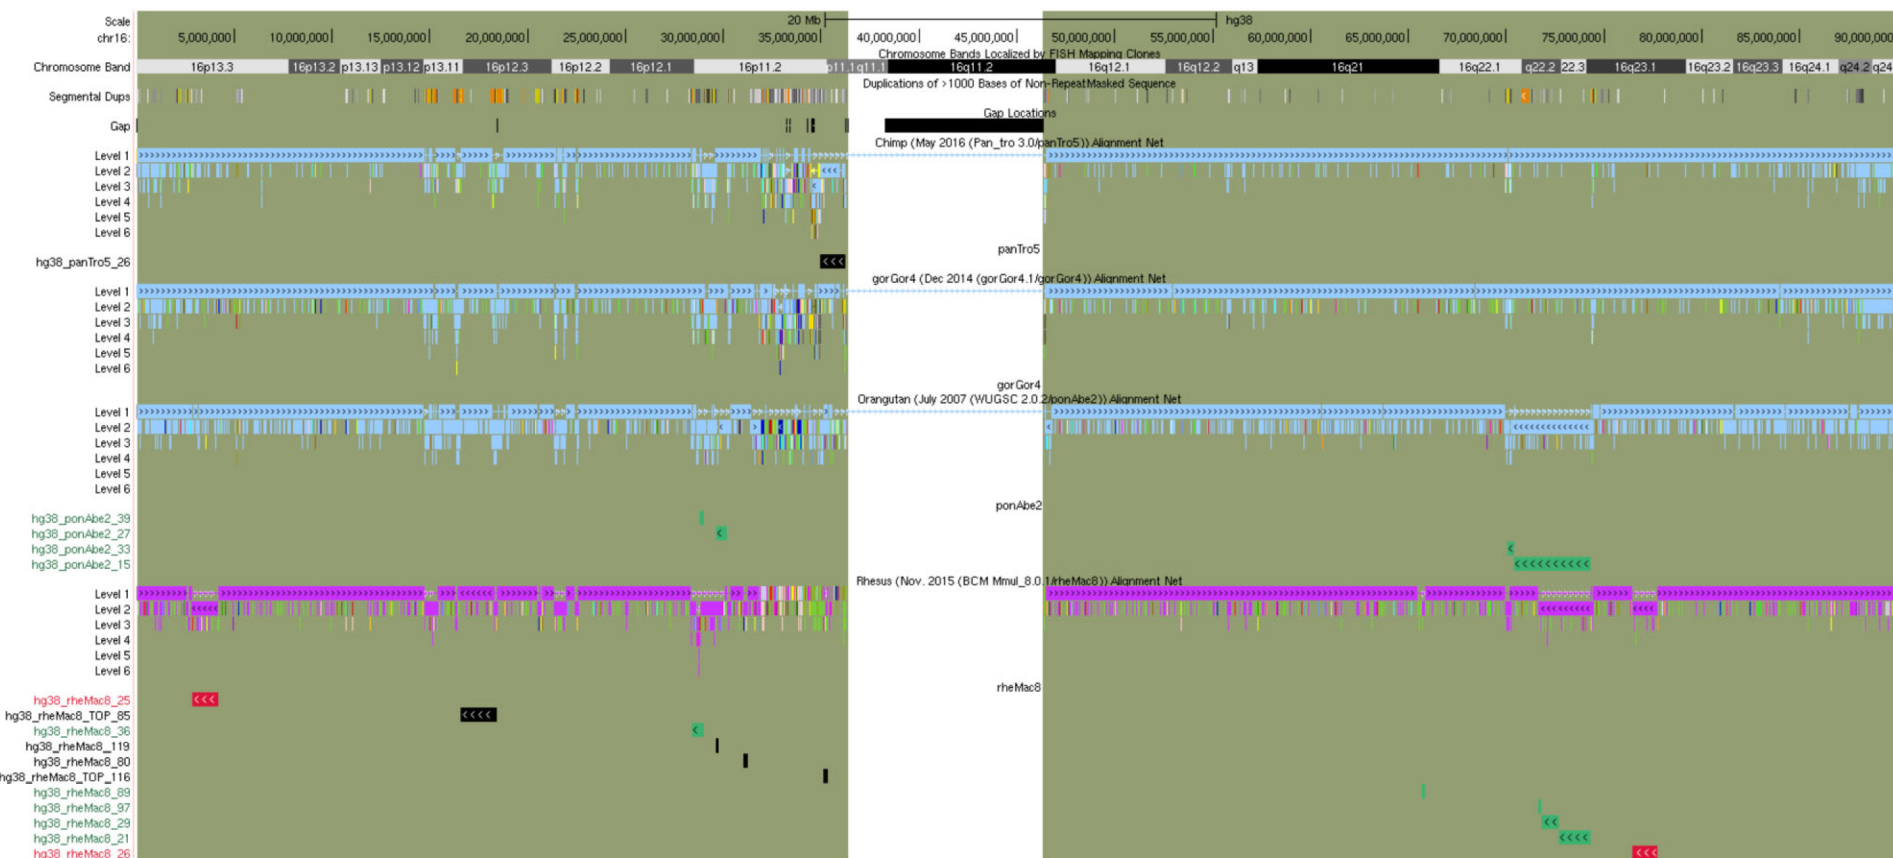



# GGO17

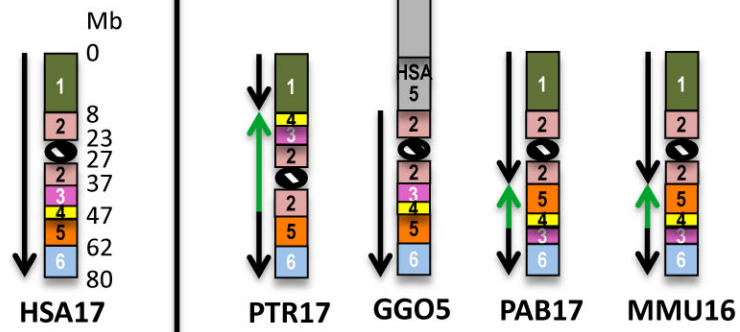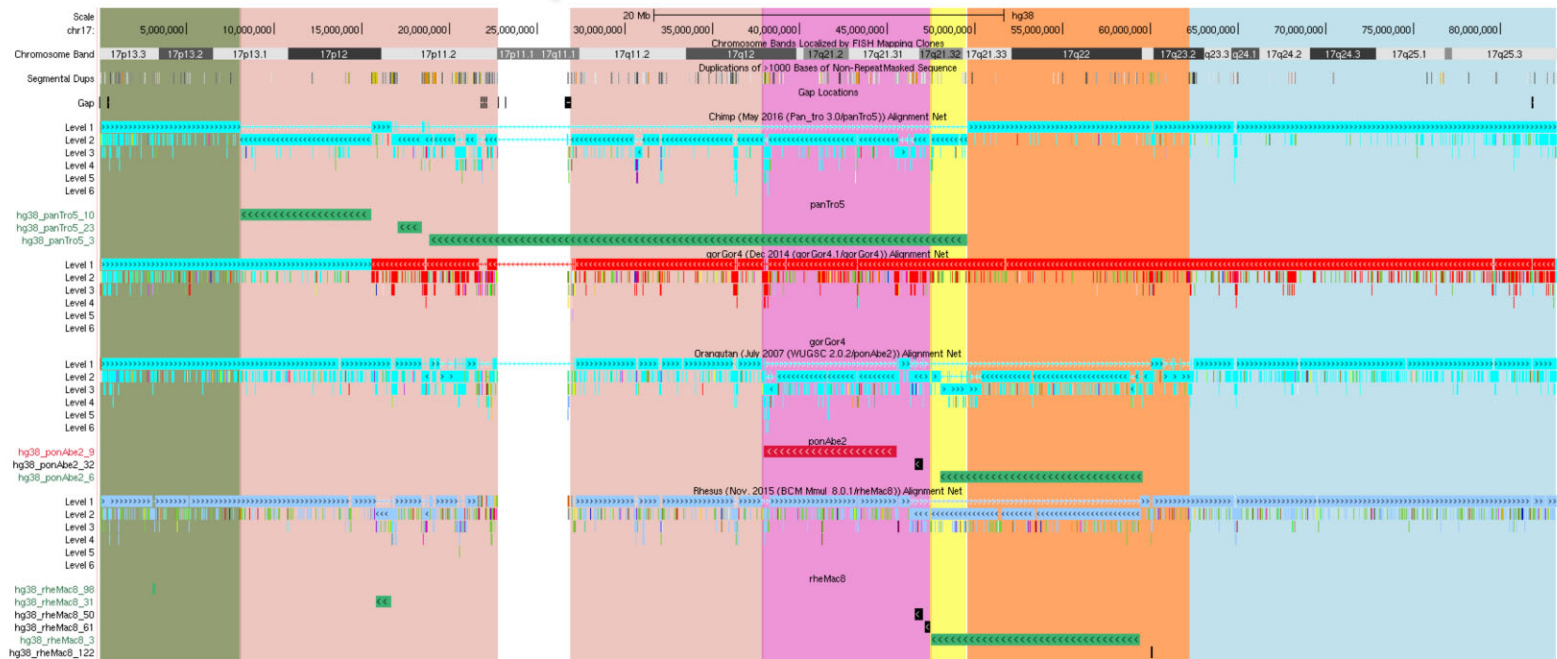

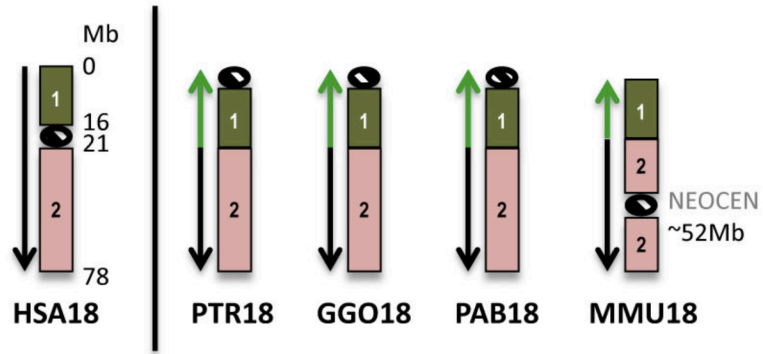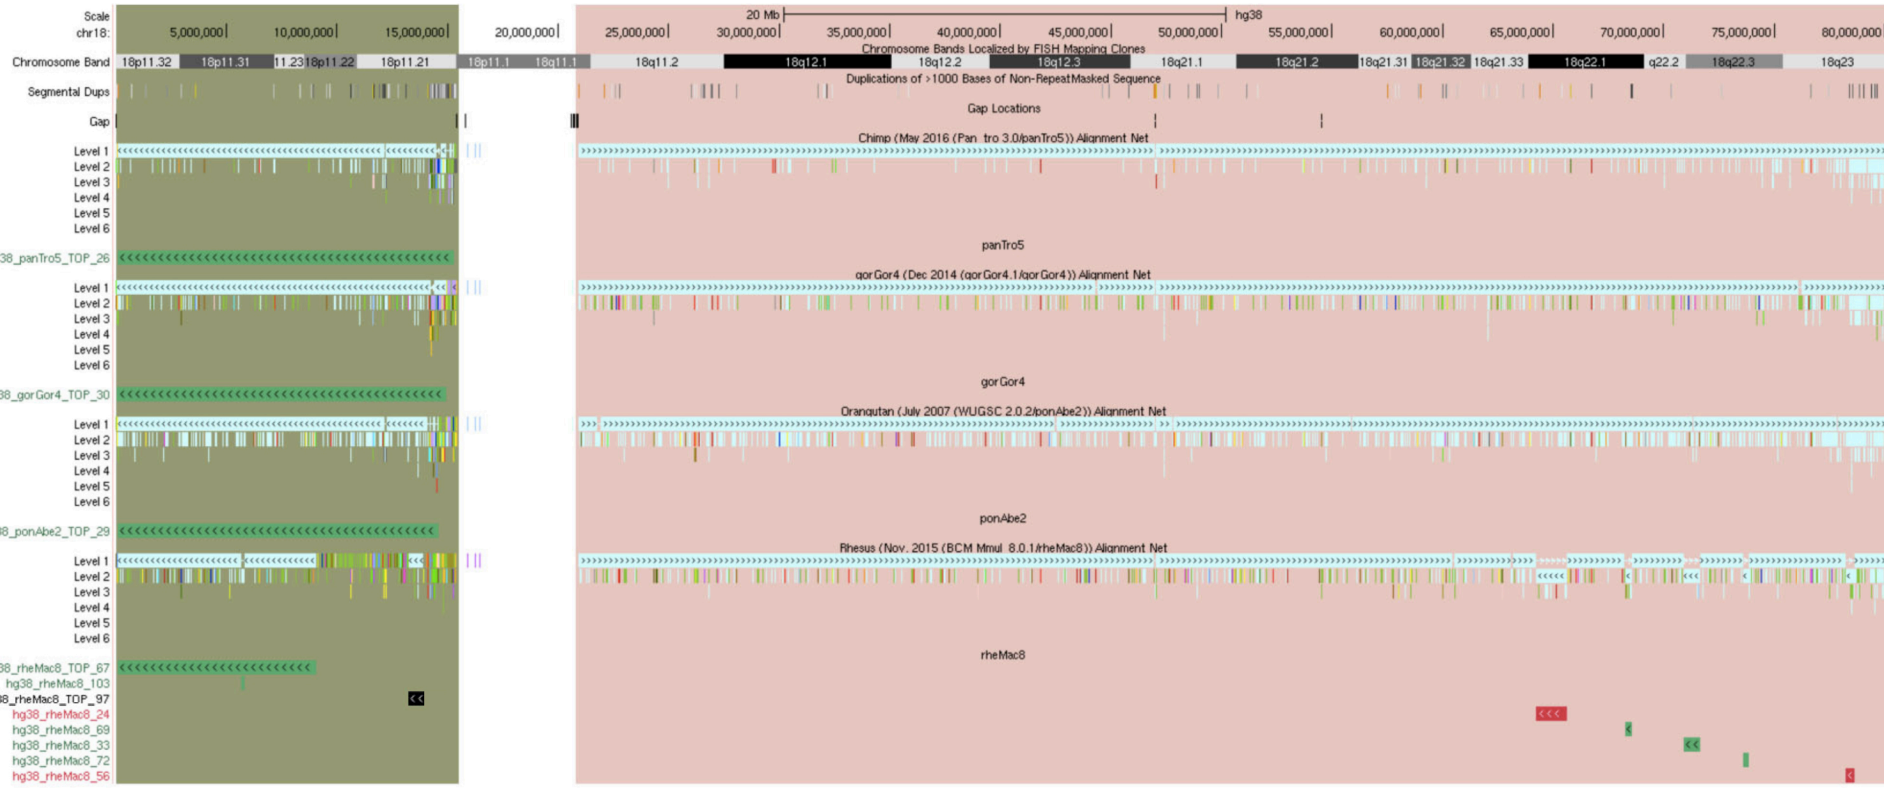

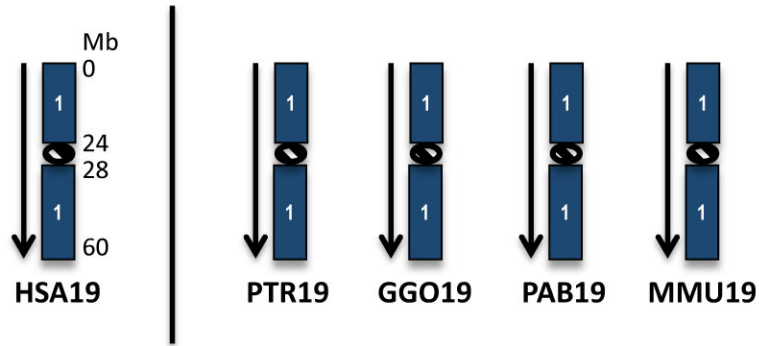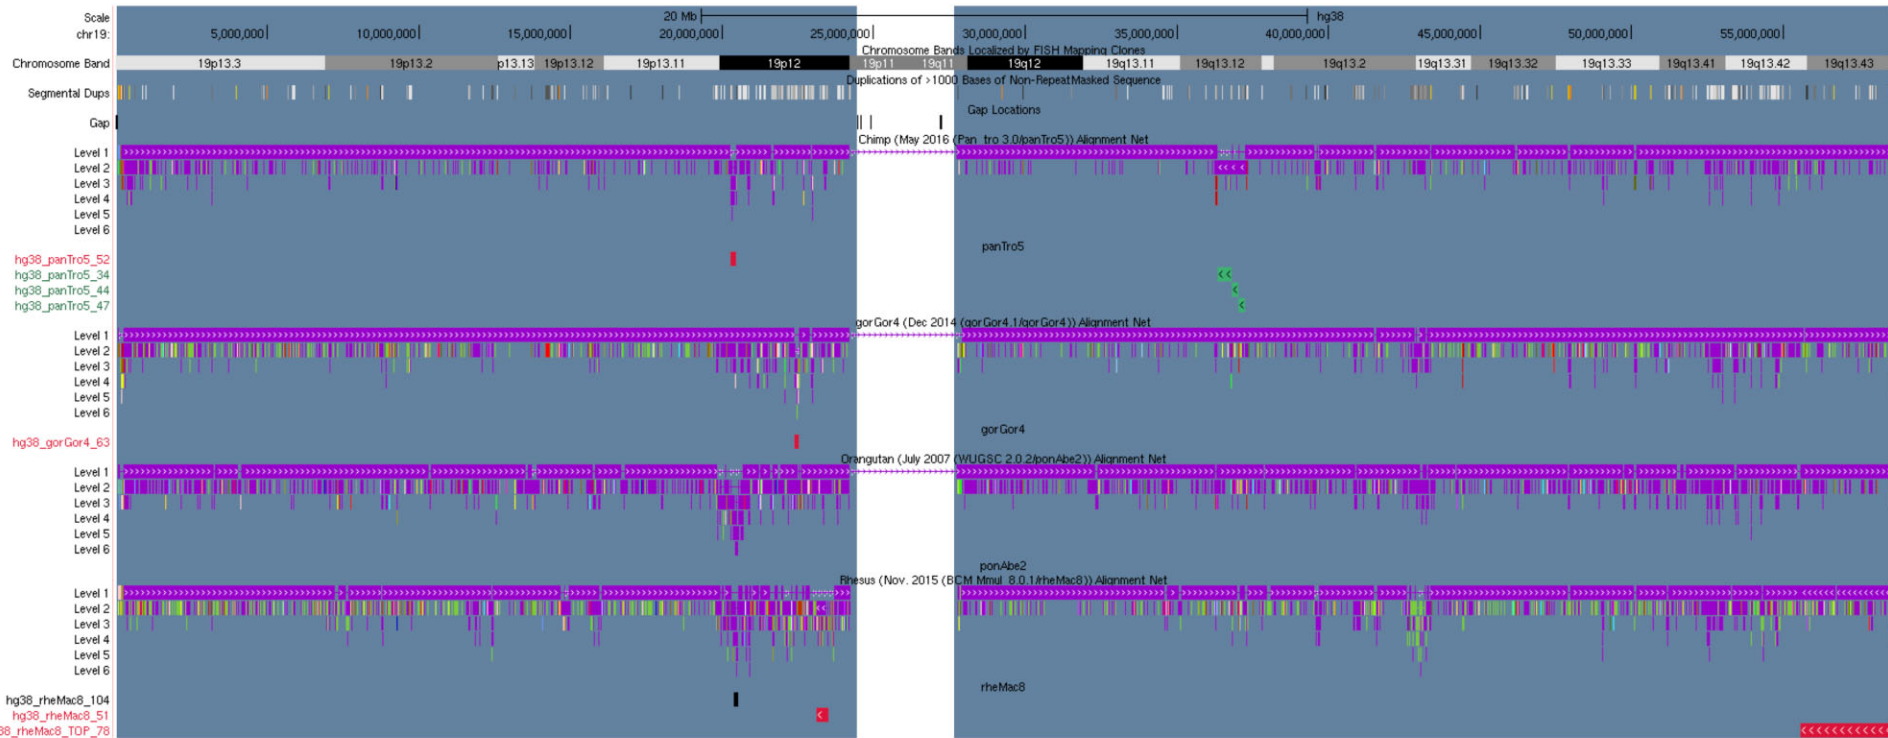

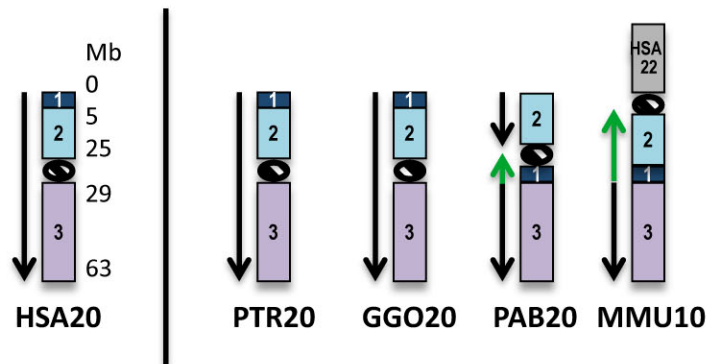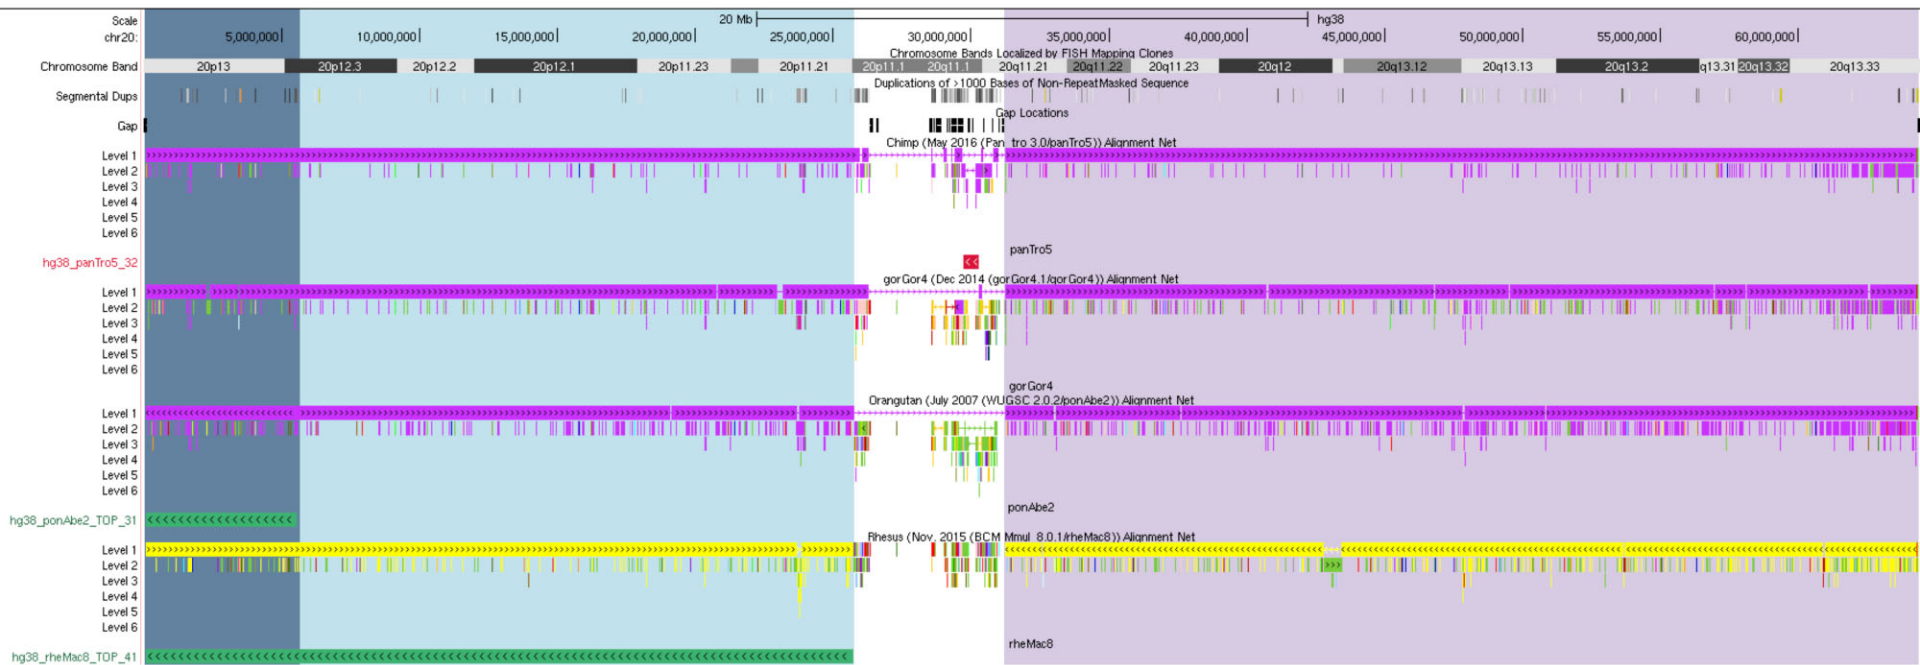

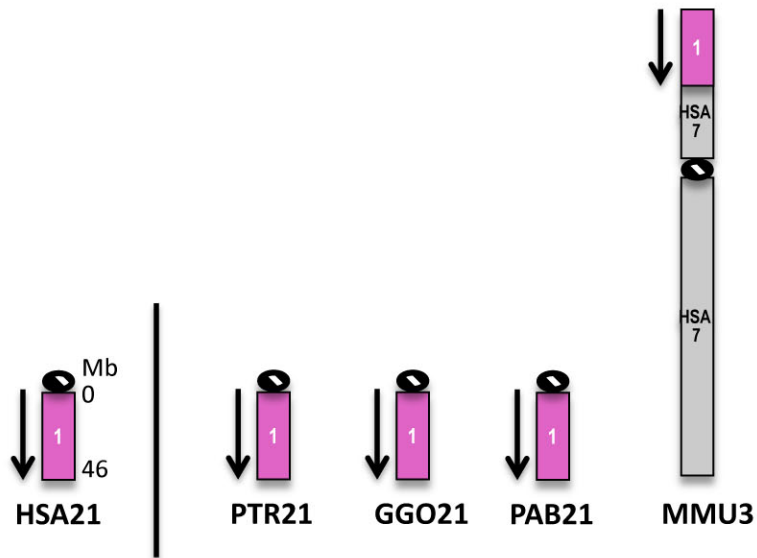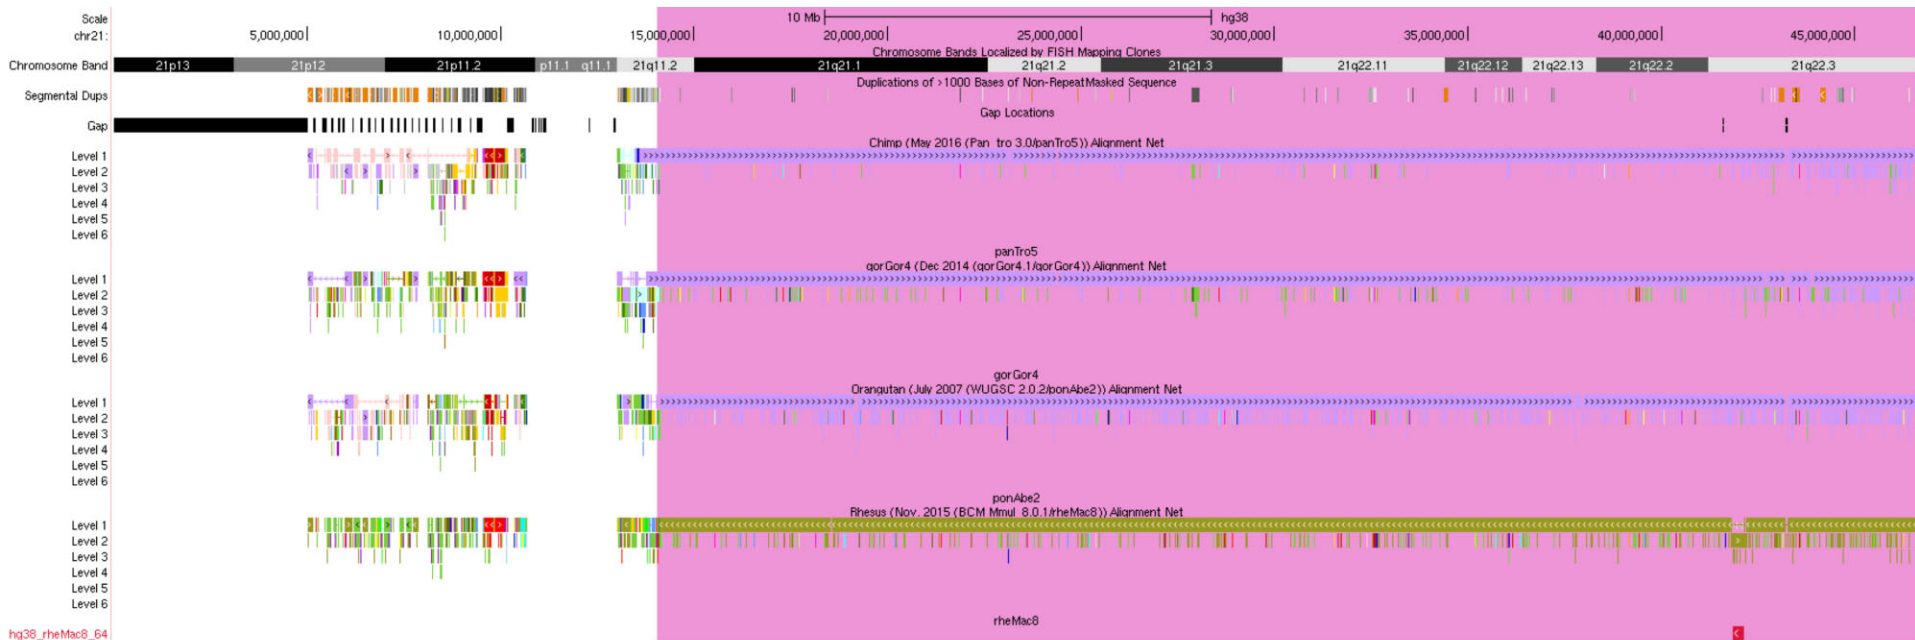

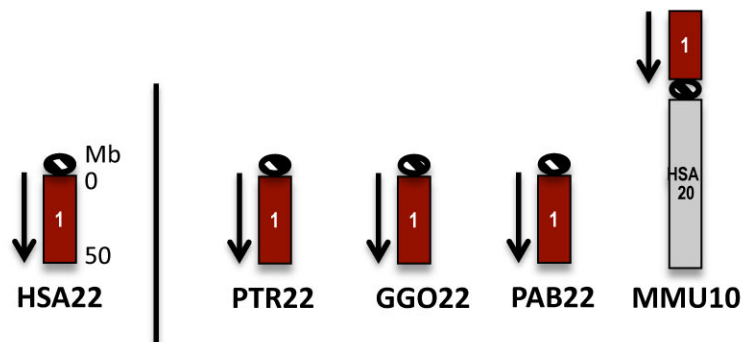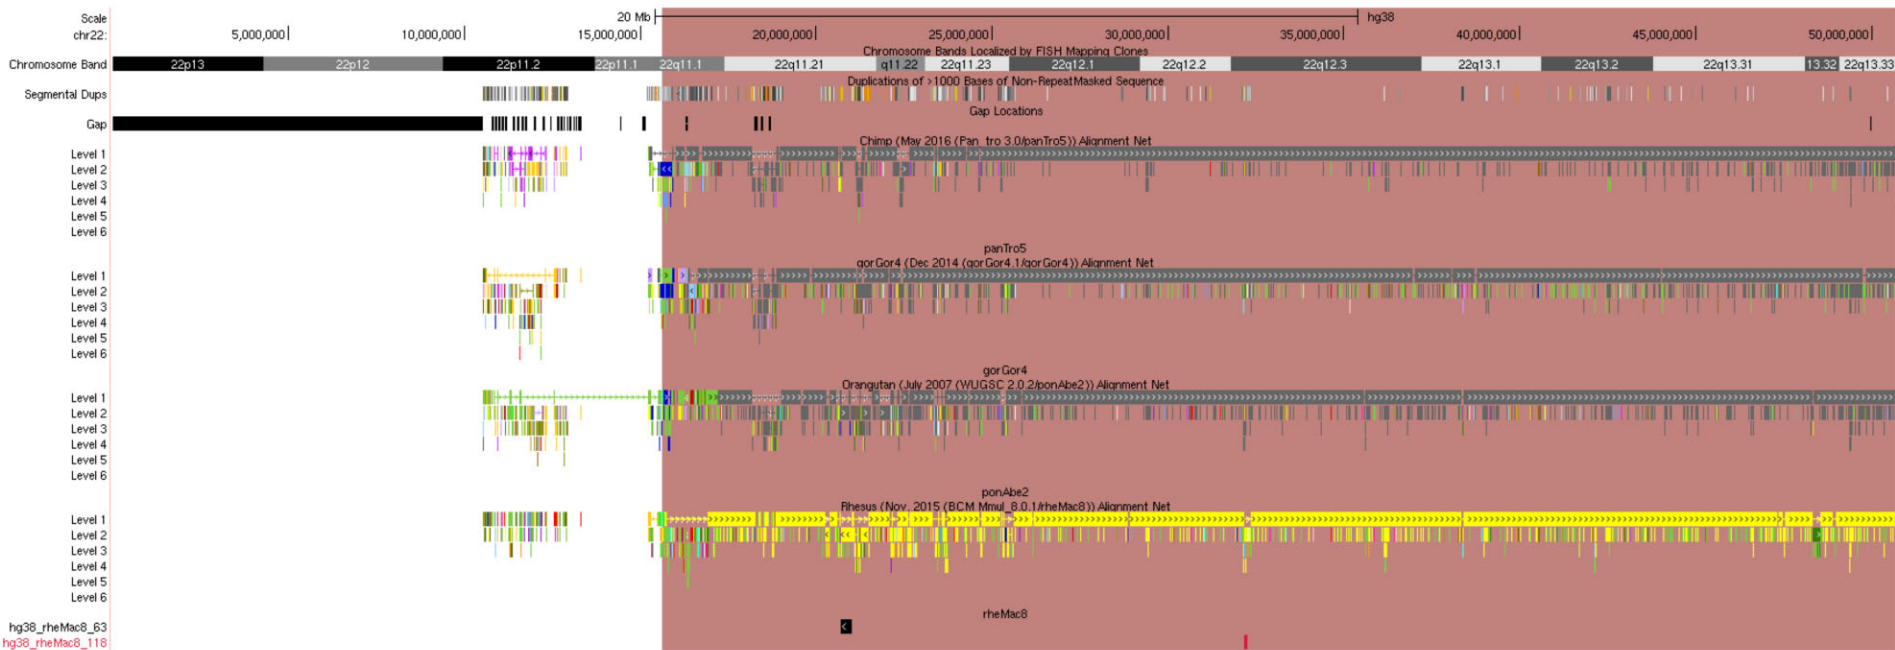

**Supplemental Fig. S1. Map of new and previously described genomic inversions.**

Chromosome ideograms for human, chimpanzee, gorilla, orangutan and macaque together with the UCSC Genome Browser views of the inversions detected in the study. Ideograms only show previously reported inversions larger than 5 Mb. Synteny blocks, distinguished by colors and numbers, represent regions that are inverted in a least one of the species analyzed, but the order of the markers within the block is conserved in all the different species. Green arrows on the left of each ideogram indicate inverted blocks with respect to human orientation. Small red arrows on the right of the ideograms represent inversions known from previous studies but not detected by net alignments. In the bottom panel, UCSC Genome Browser views of the net alignments and inversions predicted in the present study between human and nonhuman primate genomes. Regions called to be inverted in the present study are shown as green, red and black horizontal bars, and represent real, false and not determined (ND) inversions, respectively. Synteny block colors are consistent with upper panel, and allow to compare regions found to be inverted in the present study with previously identified inversions.

Scale

10 Mb

hg38

Chr1:

110,000,000

115,000,000

120,000,000

125,000,000

130,000,000

135,000,000

140,000,000

145,000,000

Chromosome Bands Localized by FISH Mapping Clones

Chromosome Band

1p21.1

1p13.3

1p13.2

p13.1

1p12

11.2p

11.11q

11q11

1q12

1q21.1

Chr1\_inv2

Chr1\_inv2

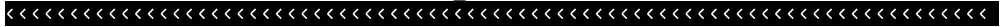

metaphase FISH probes

G248P89047B7

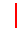

G248P82996H9

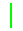

Gap Locations

Gap

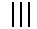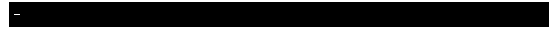

Duplications of >1000 Bases of Non-RepeatMasked Sequence

Segmental Dups

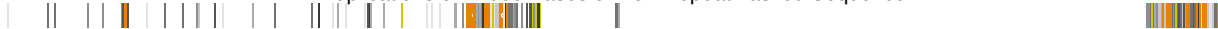



Scale

1 Mb

hg38

Chr1:

146,000,000

146,500,000

147,000,000

147,500,000

148,000,000

148,500,000

Chromosome Bands Localized by FISH Mapping Clones

Chromosome Band

1q21.1

1q21.2

Chr1\_inv3

Chr1\_inv3

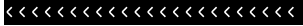

interphase FISH probes

G248P87580A1

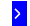

G248P85471H3

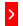

G248P86490B5

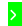

Gap Locations

Gap

Duplications of >1000 Bases of Non-RepeatMasked Sequence

Segmental Dups

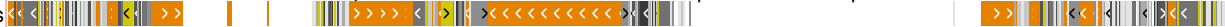

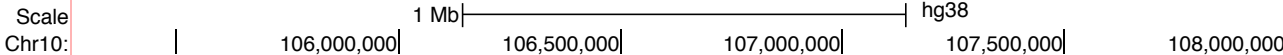

Chromosome Bands Localized by FISH Mapping Clones

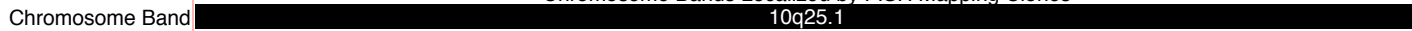

Chr10\_inv3

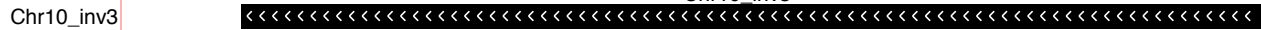

interphase FISH probes

WI2-1699F23

WI2-2629B2

WI2-1673D12

Gap Locations

Gap

Duplications of >1000 Bases of Non-RepeatMasked Sequence

Segmental Dups

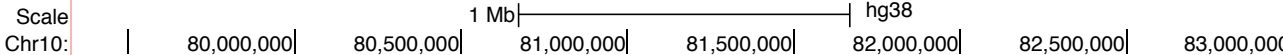

Chromosome Bands Localized by FISH Mapping Clones

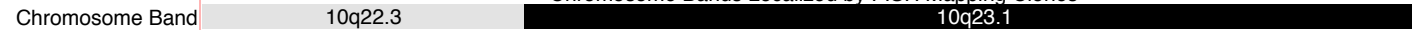

Chr10\_inv4

Chr10\_inv4

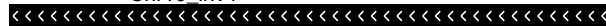

interphase FISH probes

RP11-1030I16  
RP11-319L5  
RP11-690O22

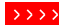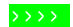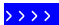

Gap Locations

Duplications of >1000 Bases of Non-RepeatMasked Sequence

Segmental Dups

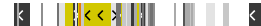

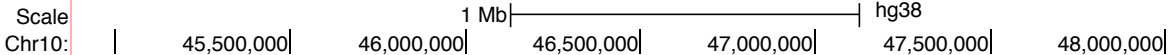

Chromosome Bands Localized by FISH Mapping Clones

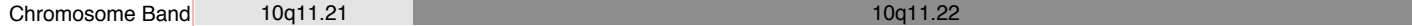

Chr10\_inv6

Chr10\_inv6

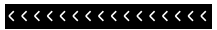

interphase FISH probes

G248P86891H2  
 G248P800478D10  
 G248P89216B1

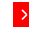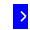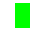

Gap Locations

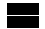

Duplications of >1000 Bases of Non-RepeatMasked Sequence

Segmental Dups

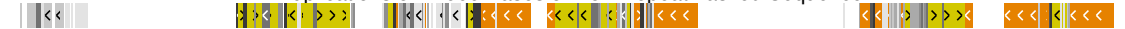

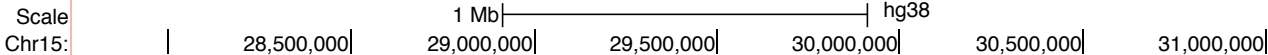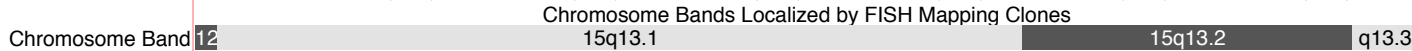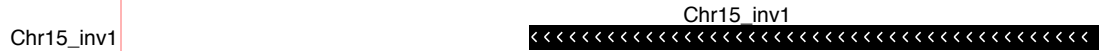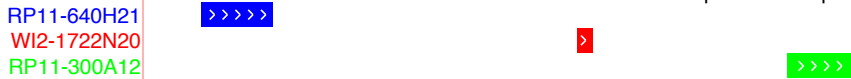

Gap Locations

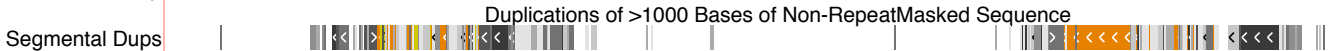

Scale 500 kb hg38  
Chr15: 73,000,000 73,500,000 74,000,000

Chromosome Bands Localized by FISH Mapping Clones

Chromosome Band

15q24.1

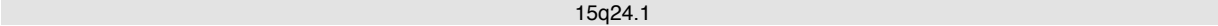

Chr15\_inv2

Chr15\_inv2

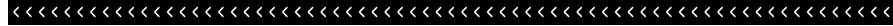

interphase FISH probes

WI2-1551G5

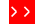

WI2-3701P1

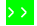

WI2-1763I5

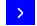

Gap Locations

Duplications of >1000 Bases of Non-RepeatMasked Sequence

Segmental Dups

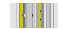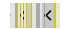

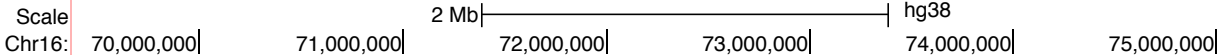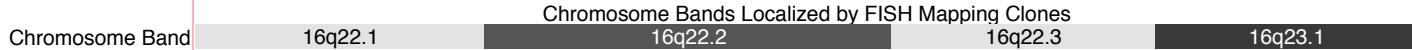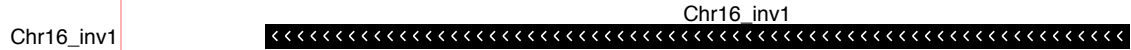

RP11-779G13 >>

WI2-2368K2

G248P85068H6

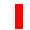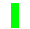

Gap Locations

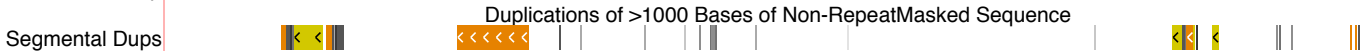

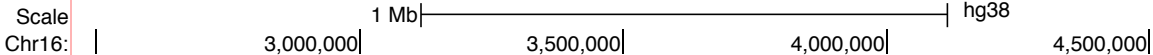

Chromosome Bands Localized by FISH Mapping Clones

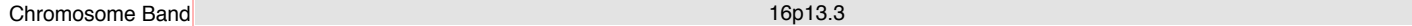

Chr16\_inv4

Chr16\_inv4

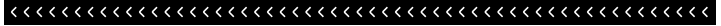

interphase FISH probes

RP11-619M1

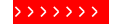

RP11-876F24

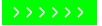

RP11-707M17

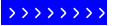

Gap Locations

Gap

Duplications of >1000 Bases of Non-RepeatMasked Sequence

Segmental Dups

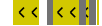



Scale 500 kb hg38  
Chr16: 76,500,000 77,000,000 77,500,000

Chromosome Bands Localized by FISH Mapping Clones

Chromosome Band

16q23.1

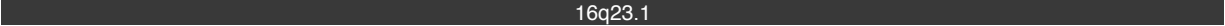

Chr16\_inv6

Chr16\_inv6

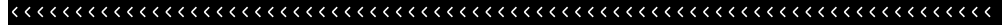

interphase FISH probes

WI2-1991O15

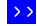

WI2-1773I19

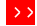

WI2-3622O10

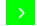

Gap Locations

Gap

Duplications of >1000 Bases of Non-RepeatMasked Sequence

Segmental Dups

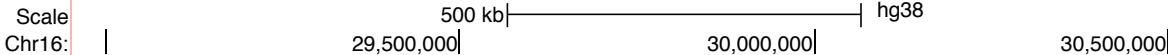

Chromosome Bands Localized by FISH Mapping Clones

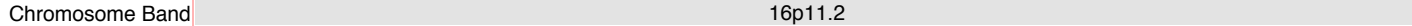

Chr16\_inv8

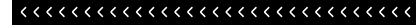

G248P82830F11  
 G248P81405C1  
 G248P80035A4

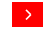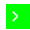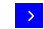

Gap Locations

Duplications of >1000 Bases of Non-RepeatMasked Sequence

Segmental Dups

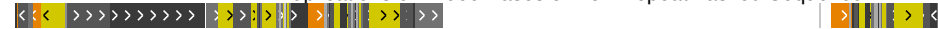

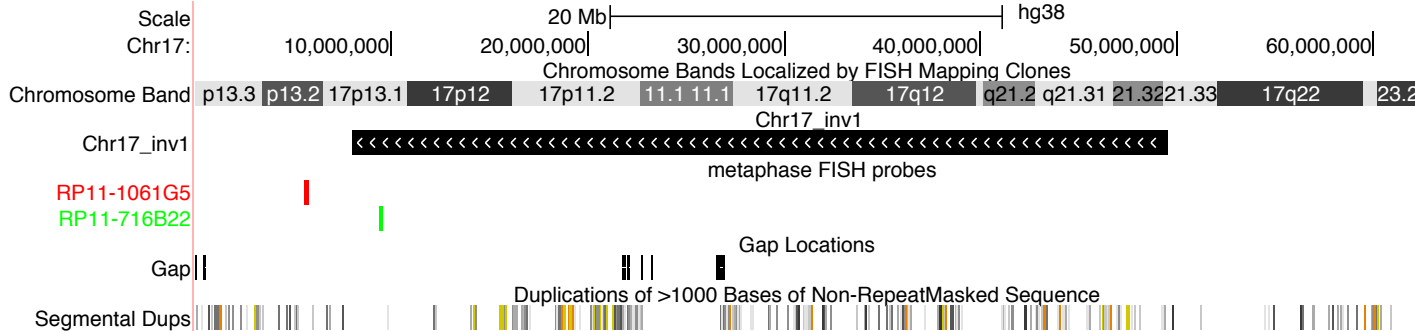

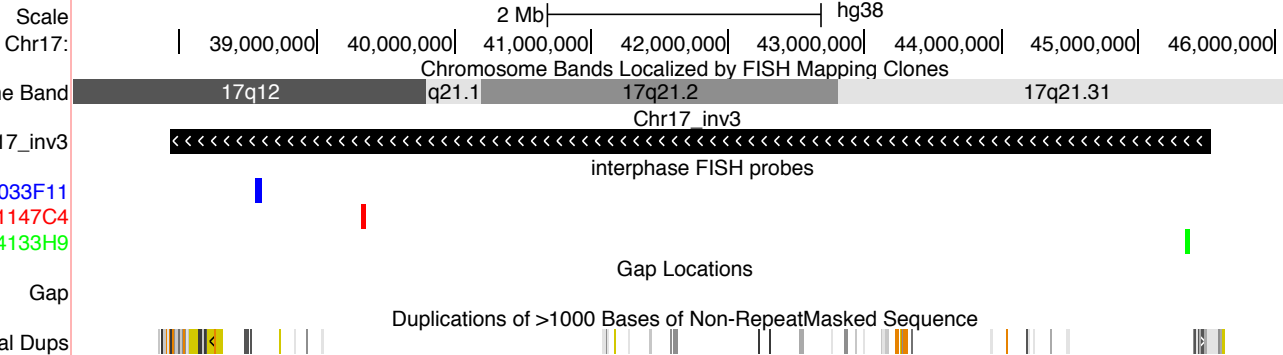

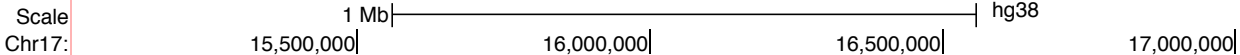

Chromosome Bands Localized by FISH Mapping Clones

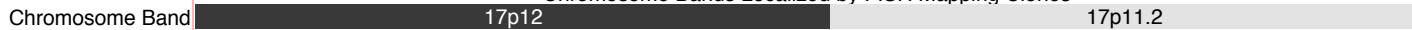

Chr17\_inv4

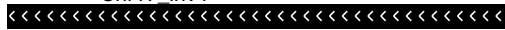

Gap Locations

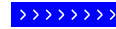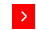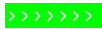

Duplications of >1000 Bases of Non-RepeatMasked Sequence

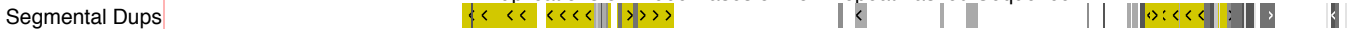

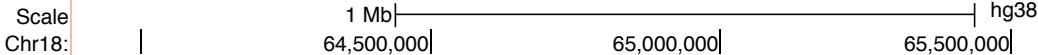

Chromosome Bands Localized by FISH Mapping Clones

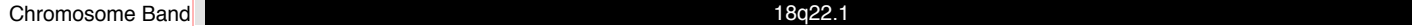

Chr18\_inv2

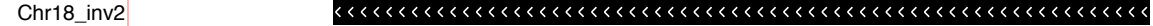

interphase FISH probes

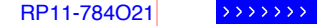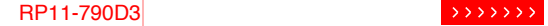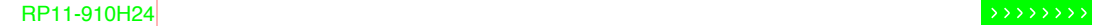

Gap Locations

Duplications of >1000 Bases of Non-RepeatMasked Sequence

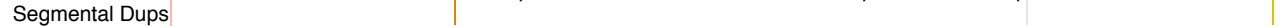



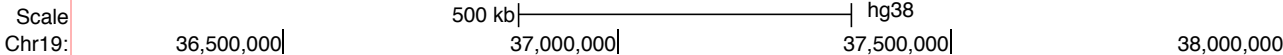

Chromosome Bands Localized by FISH Mapping Clones

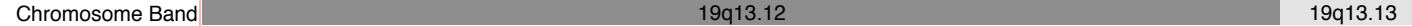

Chr19\_inv2

Chr19\_inv2

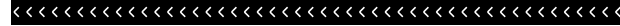

interphase FISH probes

RP11-1148D20

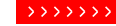

RP11-1088H16

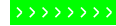

RP11-587I9

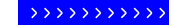

Gap Locations

Gap

Duplications of >1000 Bases of Non-RepeatMasked Sequence

Segmental Dups

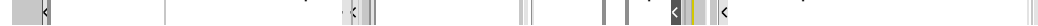





Scale

2 Mb

hg38

Chr4:

4,000,000

5,000,000

6,000,000

7,000,000

8,000,000

9,000,000

10,000,000

Chromosome Bands Localized by FISH Mapping Clones

Chromosome Band

4p16.3

4p16.2

4p16.1

Chr4\_inv5

Chr4\_inv5

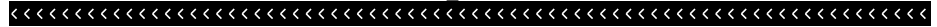

metaphase FISH probes

G248P8419H5

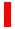

G248P89041F10

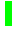

Gap Locations

Gap

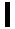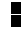

Duplications of >1000 Bases of Non-RepeatMasked Sequence

Segmental Dups

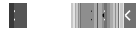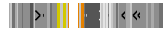

Scale

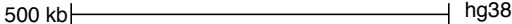

Chr5: 99,500,000 |

### Chromosome Bands Localized by FISH Mapping Clones

Chromosome Band

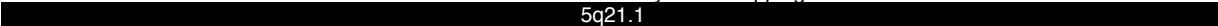

Chr5\_inv2

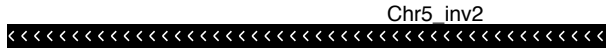

interphase FISH probes

RP11-350L5

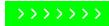

RP11-467C9

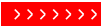

RP11-368A20

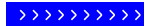

Gap Locations

Gap

Duplications of >1000 Bases of Non-RepeatMasked Sequence

Segmental Dups

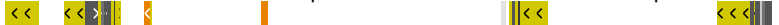

Scale

1 Mb hg38

Chr6:

104,000,000 | 104,500,000 | 105,000,000 | 105,500,000 | 106,000,000 | 106,500,000 | 107,000,000 | 107,500,000

Chromosome Bands Localized by FISH Mapping Clones

Chromosome Band

6q16.3

6q21

Chr6\_inv2

Chr6\_inv2

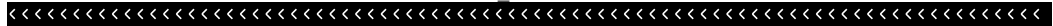

interphase FISH probes

WI2-2840C22

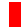

WI2-1971C10

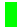

WI2-2534L10

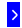

Gap Locations

Gap

Duplications of >1000 Bases of Non-RepeatMasked Sequence

Segmental Dups

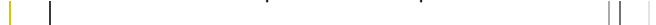

Scale

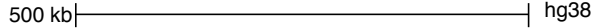

Chr7:

Chromosome Bands Localized by FISH Mapping Clones

Chromosome Band

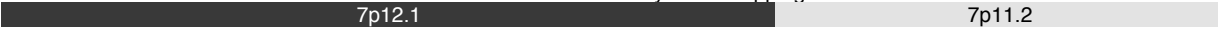

Chr7\_inv10

Chr7\_inv10

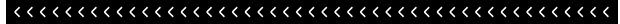

interphase FISH probes

RP11-1056A8

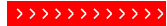

RP11-775N3

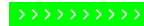

RP11-478G18

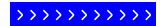

Gap Locations

Gap

Duplications of >1000 Bases of Non-RepeatMasked Sequence

Segmental Dups

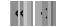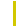

Scale

2 Mb

hg38

Chr7:

14,000,000

15,000,000

16,000,000

17,000,000

18,000,000

19,000,000

Chromosome Bands Localized by FISH Mapping Clones

Chromosome Band

7p21.3

7p21.2

7p21.1

Chr7\_inv3

Chr7\_inv3

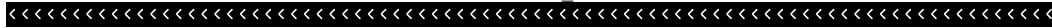

interphase FISH probes

WI2-455G21

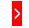

WI2-3496M23

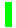

WI2-2240K12

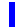

Gap Locations

Gap

Duplications of >1000 Bases of Non-RepeatMasked Sequence

Segmental Dups

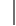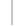

Scale

2 Mb

hg38

Chr7:

144,000,000

145,000,000

146,000,000

147,000,000

148,000,000

149,000,000

Chromosome Bands Localized by FISH Mapping Clones

Chromosome Band

7q34

7q35

7q36.1

Chr7\_inv4

Chr7\_inv4

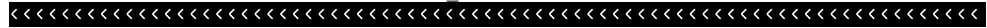

interphase FISH probes

WI2-491B21

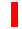

WI2-1692N22

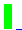

WI2-827H23

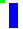

Gap Locations

Gap

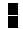

Duplications of >1000 Bases of Non-RepeatMasked Sequence

Segmental Dups

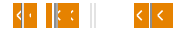

Scale

1 Mb

hg38

Chr7:

72,000,000

72,500,000

73,000,000

73,500,000

74,000,000

74,500,000

75,000,000

75,500,000

Chromosome Bands Localized by FISH Mapping Clones

Chromosome Band

7q11.22

7q11.23

Chr7\_inv6

Chr7\_inv6

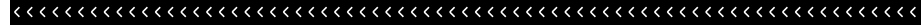

interphase FISH probes

WI2-3210F8

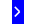

RP11-460F3

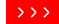

RP11-351B3

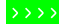

Gap Locations

Gap

Duplications of >1000 Bases of Non-RepeatMasked Sequence

Segmental Dups

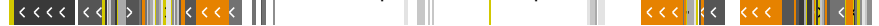





Scale

1 Mb

hg38

Chr8:

50,500,000

51,000,000

51,500,000

52,000,000

52,500,000

53,000,000

53,500,000

Chromosome Bands Localized by FISH Mapping Clones

Chromosome Band

8q11.21

8q11.22

8q11.23

Chr8\_inv3

Chr8\_inv3

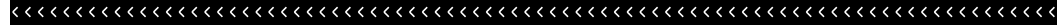

interphase FISH probes

WI2-782F1

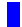

WI2-2075A5

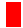

WI2-2945D23

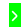

Gap Locations

Gap

Duplications of >1000 Bases of Non-RepeatMasked Sequence

Segmental Dups

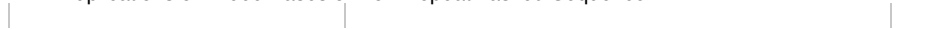

Scale

1 Mb

hg38

Chr8:

40,500,000

41,000,000

41,500,000

42,000,000

42,500,000

43,000,000

43,500,000

Chromosome Bands Localized by FISH Mapping Clones

Chromosome Band

8p11.21

8p11.1

Chr8\_inv4

Chr8\_inv4

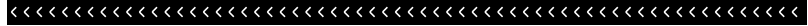

interphase FISH probes

RP11-1066P10

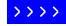

RP11-939C8

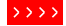

RP11-875E16

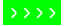

Gap Locations

Gap

Duplications of >1000 Bases of Non-RepeatMasked Sequence

Segmental Dups

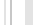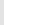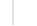

**Supplemental Fig. S2. FISH experiments and probe locations.**

The location of the probes and the type of FISH experiment (in metaphase or interphase) is shown with respect to the genomic regions studied.

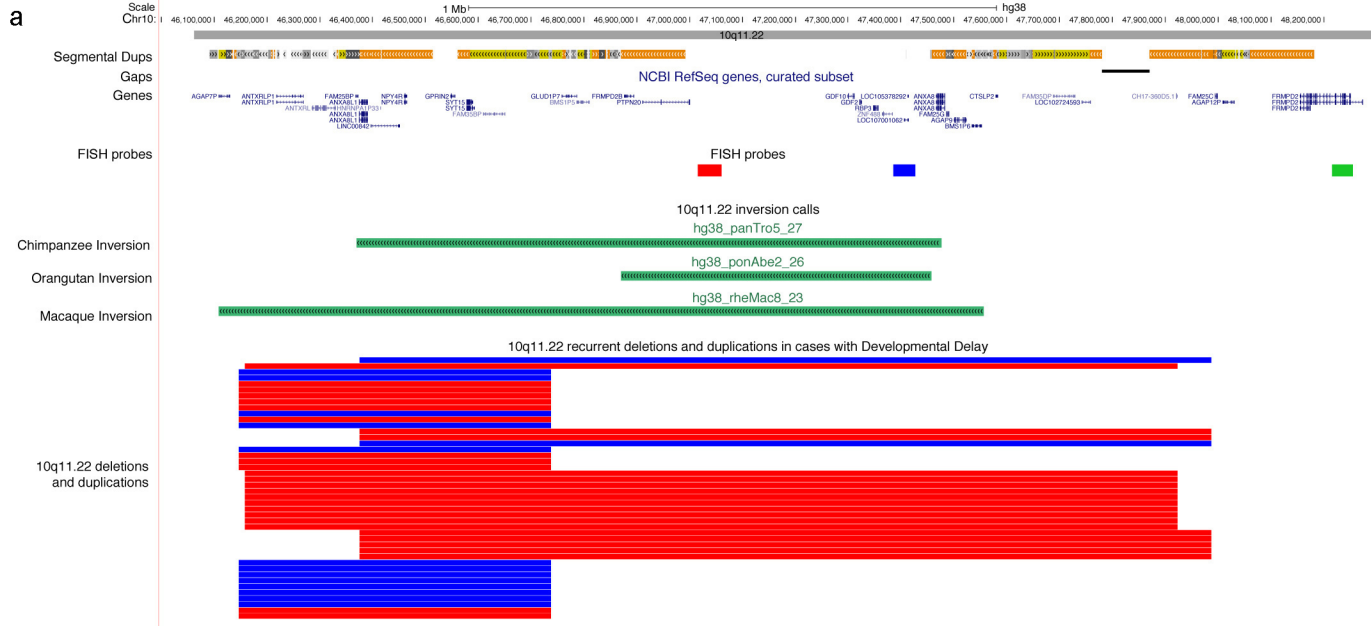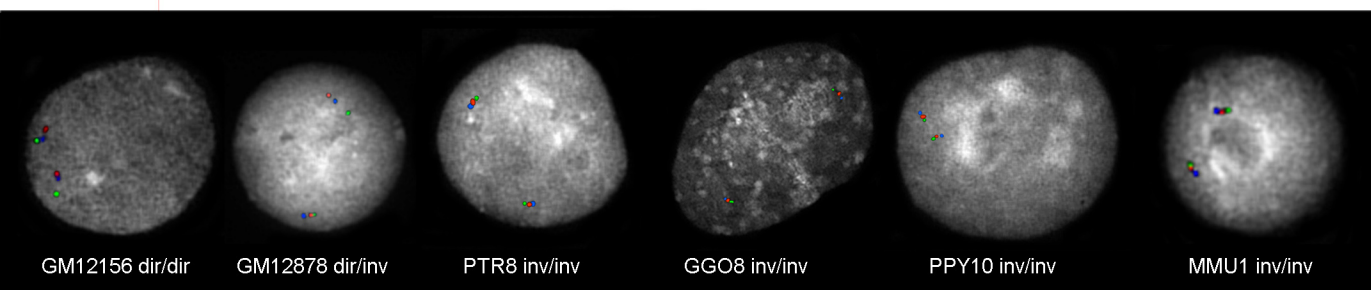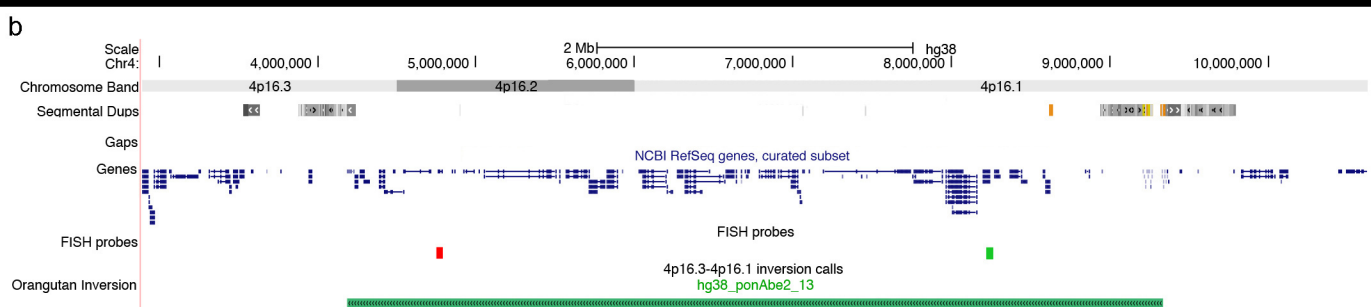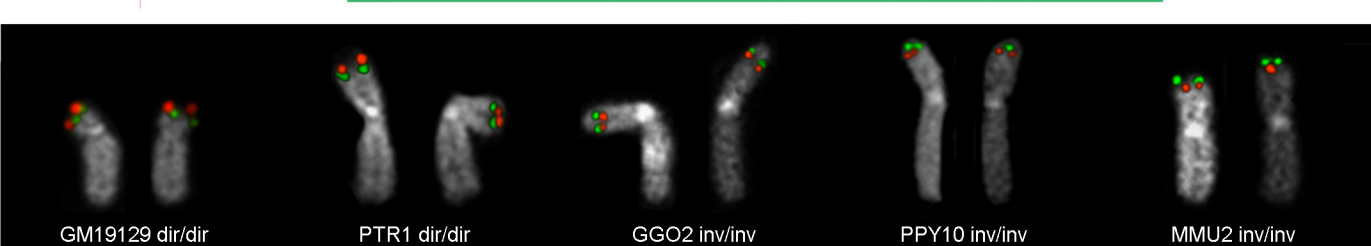

**Supplemental Fig. S3. 10q11.22 and 4p16.3-4p16.1 inversion regions.**

a) UCSC Genome Browser view of the 10q11.22 region illustrating inversion calls between human and chimpanzee, human and orangutan, and human and macaque. FISH probes used to validate the inversion are shown. Recurrent microdeletions/microduplications are described at the 10q11.22 locus. At the bottom, FISH results on interphase nuclei show that the inversion is polymorphic in human while all the other nonhuman primates tested carry the inverted haplotype. b) UCSC Genome Browser view of the 4p16.3-4p16.1 region illustrating the inversion call between human and macaque. FISH probes used to validate the inversion are shown. At the bottom, FISH results on metaphase nuclei show that the region was is in inverted orientation in gorilla, orangutan and macaque.

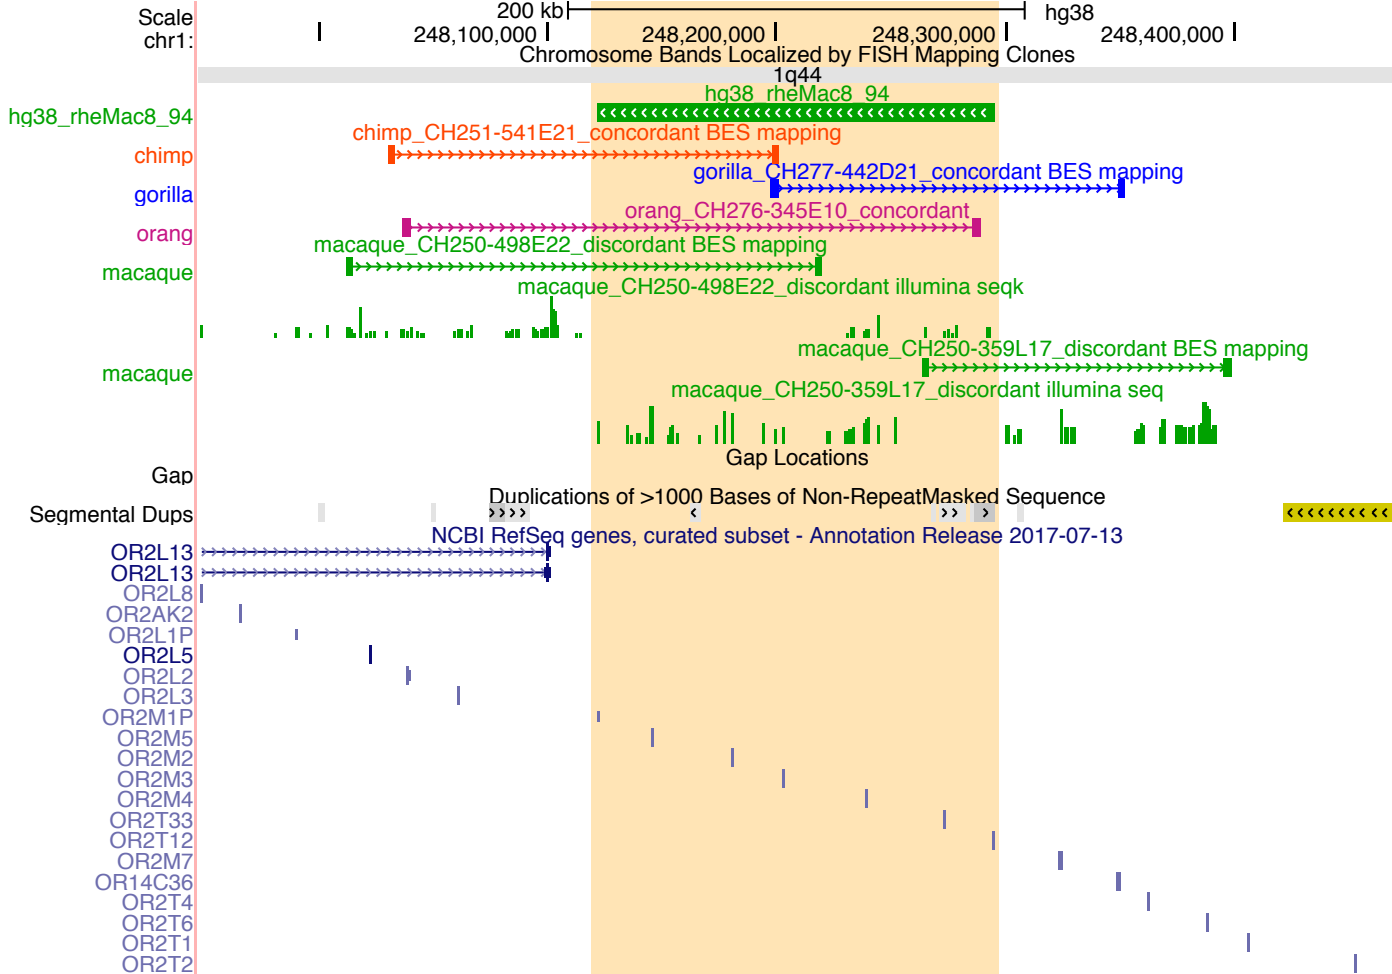

Scale chr1: | 194,100,000 | 200 kb | 194,200,000 | 194,300,000 | 194,400,000 | 194,500,000 | hg38

Chromosome Bands | localized by FISH Mapping Clones

1q31.3

hg38\_ponAbe2\_55

hg38\_ponAbe2\_55

chimp

chimp\_CH251-208F22\_concordant BES mapping

chimp\_CH251-208F22\_concordant illumina seq

gorilla

gorilla\_CH277-33N7\_concordant BES mapping

gorilla\_CH277-33N7\_concordant illumina seq

orang

orang\_CH276-252K6\_discordant BES mapping

orang\_CH276-252K6\_discordant illumina seq

orang

orang\_CH276-176F16\_discordant BES mapping

orang\_CH276-176F16\_discordant illumina seq

macaque

macaque\_CH250-343I17\_discordant BES mapping

macaque\_CH250-343I17\_discordant illumina seq

marmoset

marmoset\_CH259-53C6\_discordant BES mapping

Gap Locations

Gap

Segmental Dups

Duplications of >1000 Bases of Non-RepeatMasked Sequence

NCBI RefSeq genes, curated subset - Annotation Release 2017-07-13

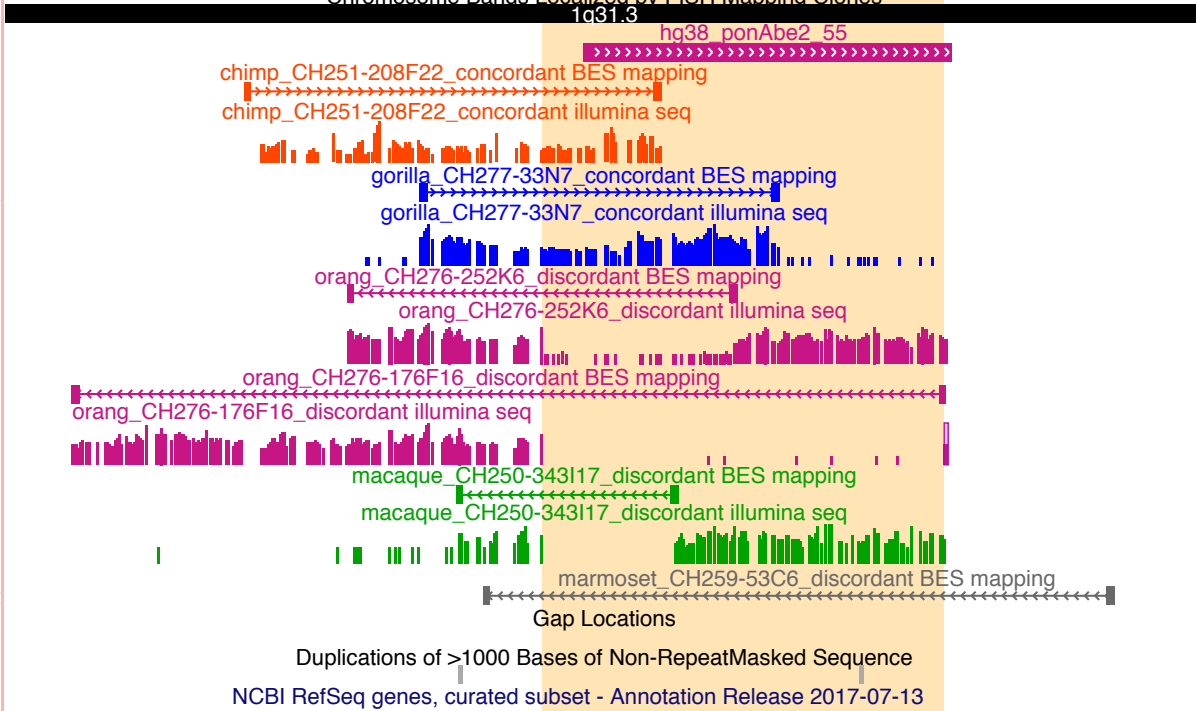



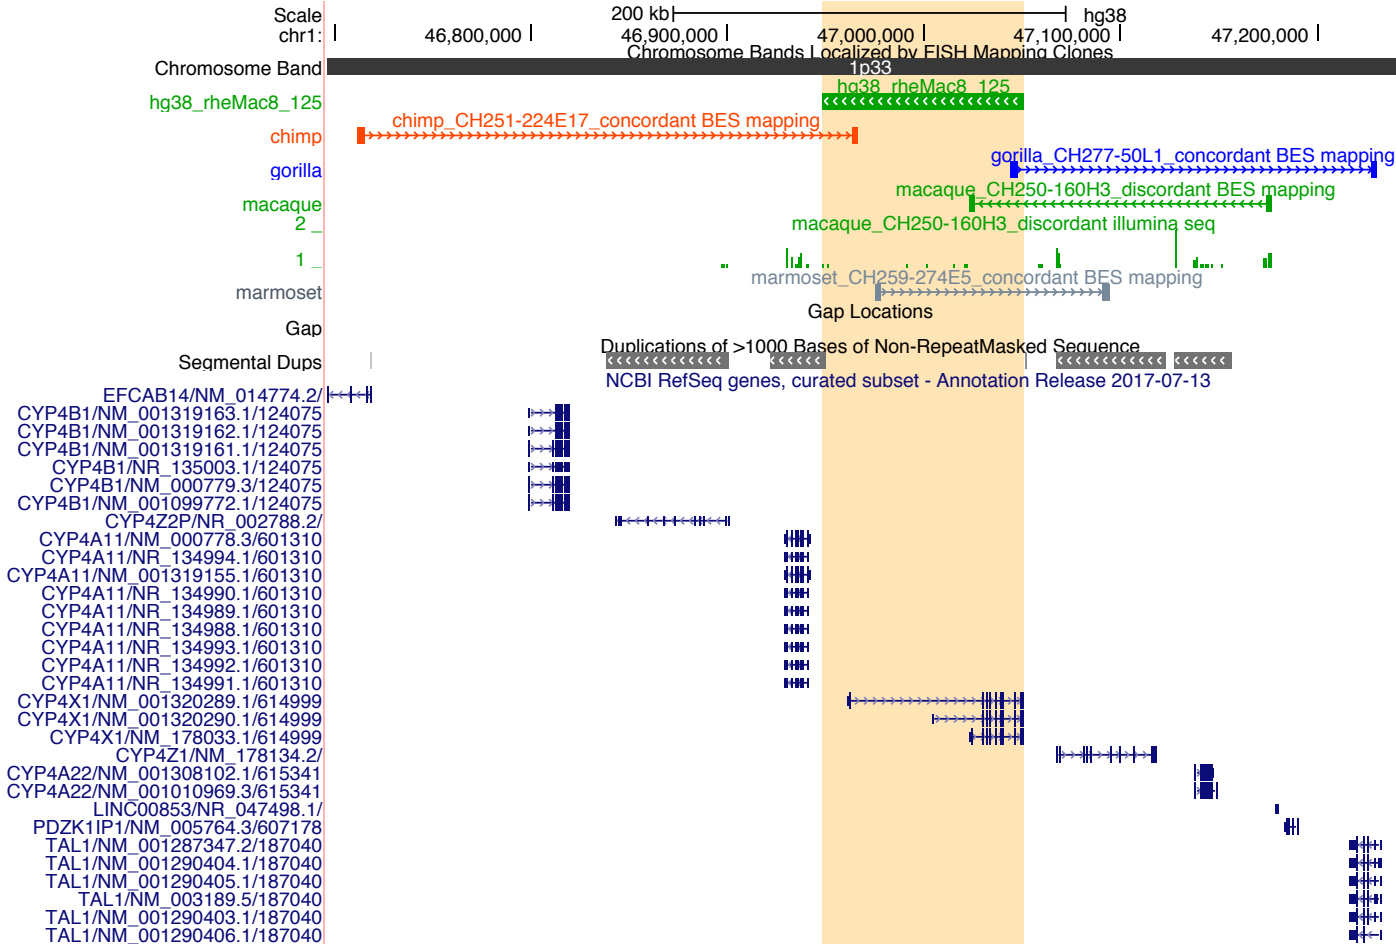

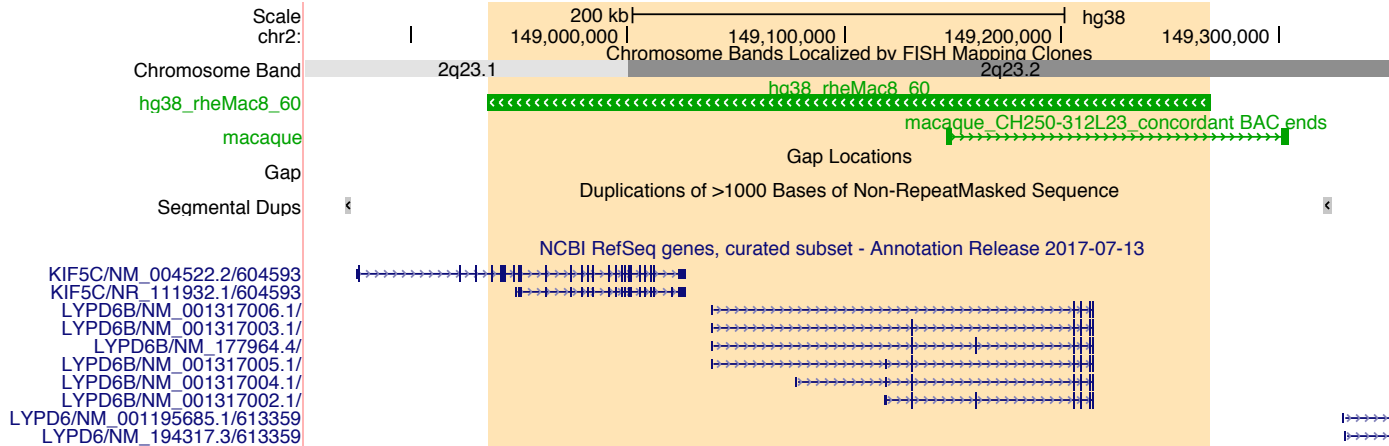

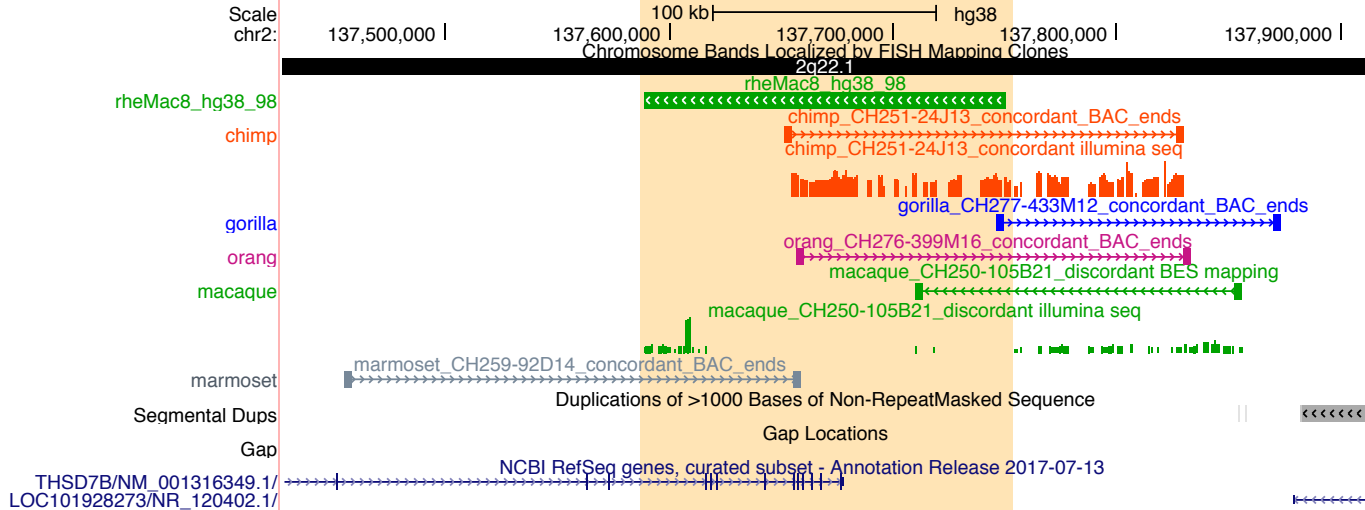

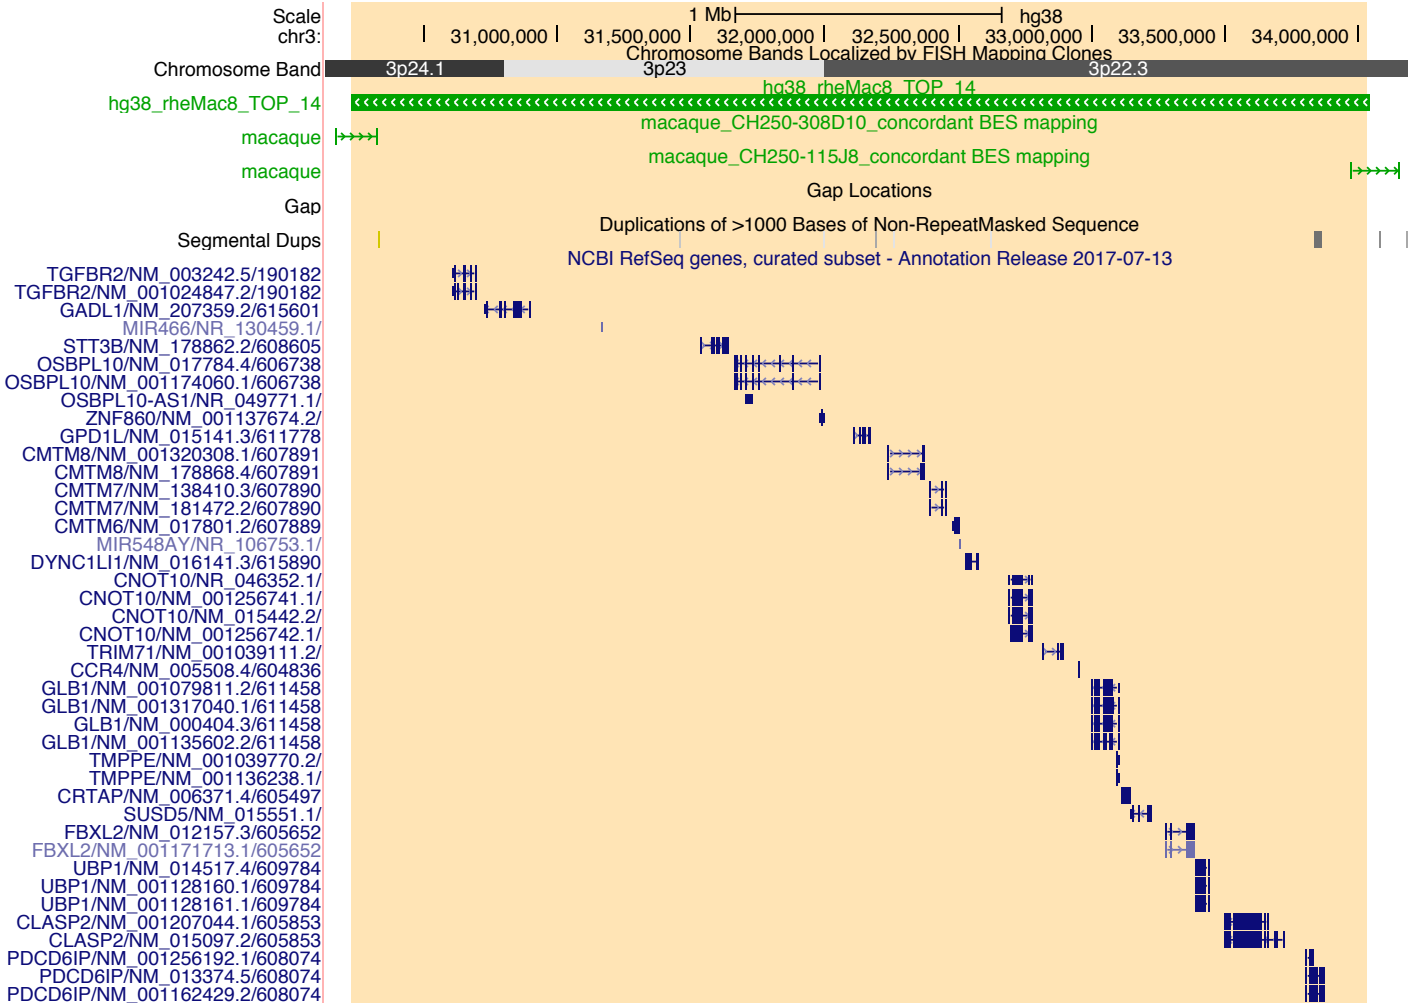

Scale chr3: | 19,500,000 | 20,000,000 | 20,500,000 | 21,000,000 | 21,500,000 | 22,000,000 | 22,500,000 | hg38

Chromosome Bands Localized by FISH Mapping Clones

Chromosome Band

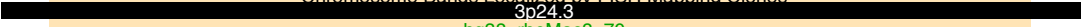

hg38\_rheMac8\_70

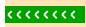

hg38\_rheMac8\_70

hg38\_rheMac8\_13

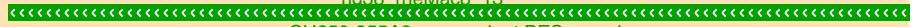

hg38\_rheMac8\_13

macaque

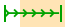

macaque\_CH250-355A8\_concordant BES mapping

macaque

macaque\_CH250-367M7\_concordant BES mapping

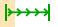

Gap

Gap Locations

Segmental Dups

Duplications of >1000 Bases of Non-RepeatMasked Sequence

NCBI RefSeq genes, curated subset - Annotation Release 2017-07-13

- KCNH8/NM\_144633.2/608260
- MIR4791/NR\_039954.1/
- EFHB/NM\_144715.3/
- RAB5A/NM\_001292048.1/179512
- RAB5A/NM\_004162.4/179512
- PP2D1/NR\_027694.1/
- PP2D1/NM\_001252657.1/
- KAT2B/NM\_003884.4/602303
- MIR3135A/NR\_036086.1/
- SGO1/NM\_001199252.2/609168
- SGO1/NM\_001199254.2/609168
- SGO1/NM\_001199257.2/609168
- SGO1/NM\_001199256.2/609168
- SGO1/NM\_001012410.4/609168
- SGO1/NM\_001012412.4/609168
- SGO1/NM\_138484.4/609168
- SGO1/NM\_001199251.2/609168
- SGO1/NM\_001199253.2/609168
- SGO1/NM\_001199255.2/609168
- SGO1/NM\_001012409.3/609168
- SGO1/NM\_001012411.3/609168
- SGO1/NM\_001012413.3/609168
- SGO1/NR\_131179.1/609168
- SGO1/NR\_131180.1/609168
- SGO1-AS1/NR\_132785.1/
- LOC101927829/NR\_110814.1/
- VENTXP7/NR\_002311.1/
- ZNF385D/NM\_024697.2/
- ZNF385D-AS1/NR\_046731.1/
- ZNF385D-AS2/NR\_046876.1/

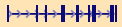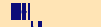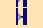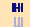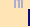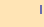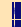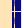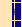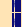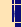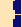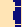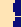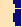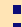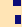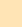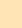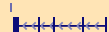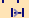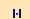

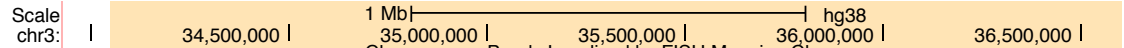

Chromosome Band **3p22.3** **3p22.2**

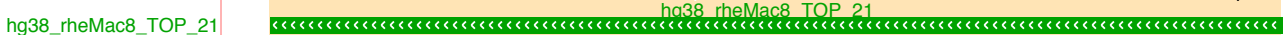

macaque **macaque\_CH250-115J8\_concordant BES mapping**

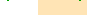

Gap Locations

Gap

Duplications of >1000 Bases of Non-RepeatMasked Sequence

Segmental Dups

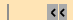

NCBI RefSeq genes, curated subset - Annotation Release 2017-07-13

- LOC101928135/NR\_110817.1/
- ARPP21/NM\_001267616.1/605488
- ARPP21/NM\_001267617.1/605488
- ARPP21/NM\_016300.4/605488
- ARPP21/NM\_001267618.1/605488
- ARPP21/NM\_001025068.1/605488
- ARPP21/NM\_001025069.1/605488
- ARPP21/NM\_001267619.1/605488
- ARPP21/NM\_198399.1/605488
- MIR128-2/NR\_029824.1/611769
- STAC/NM\_001292049.1/602317
- STAC/NM\_003149.2/602317

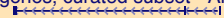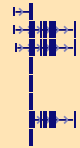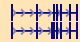

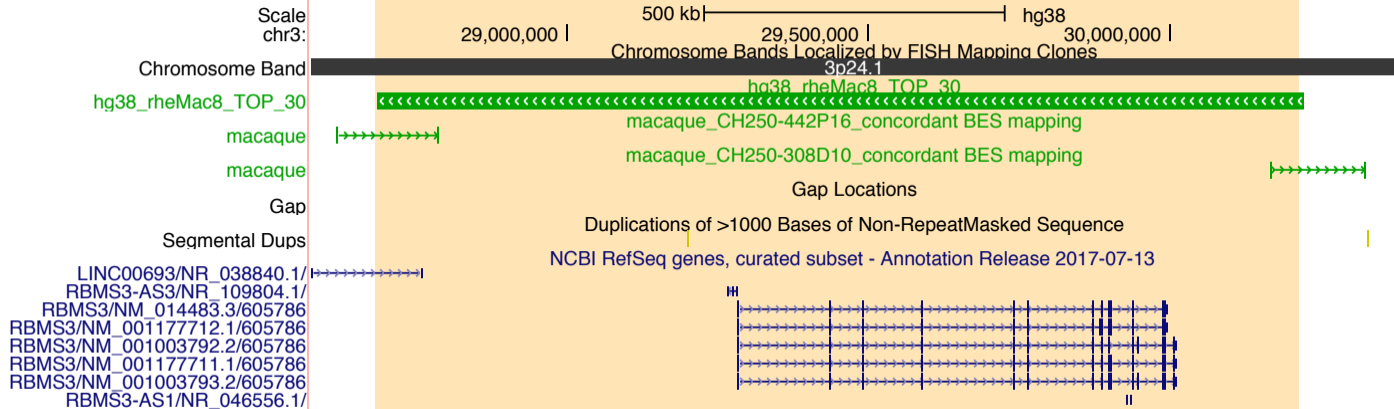

Scale chr4: | 105,000,000 | 105,500,000 | 106,000,000 | 106,500,000 | 107,000,000 | 107,500,000 | 1 Mb hg38

Chromosome Band 4q24 4q25

hg38\_rheMac8\_14 macaque\_CH250-450K19\_concordant BES mapping

macaque >>>>

Gap Locations

Duplications of >1000 Bases of Non-RepeatMasked Sequence

NCBI RefSeq genes, curated subset - Annotation Release 2017-07-13

- CXXC4/NR\_132741.1/611645
- CXXC4/NM\_025212.3/611645
- LOC101929468/NR\_125926.1/
- TET2/NM\_017628.4/612839
- TET2/NM\_001127208.2/612839
- TET2-AS1/NR\_126420.1/
- PPA2/NM\_176869.2/609988
- PPA2/NM\_006903.4/609988
- PPA2/NM\_176866.2/609988
- PPA2/NM\_176867.3/609988
- ARHGEF38/NM\_001242729.1/
- ARHGEF38/NM\_017700.1/
- ARHGEF38-IT1/NR\_046840.1/
- INTS12/NM\_020395.3/611355
- INTS12/NM\_001142471.1/611355
- GSTCD/NM\_024751.3/615912
- GSTCD/NM\_001031720.3/615912
- LOC101929529/NR\_125927.1/
- NPNT/NM\_001184692.1/610306
- NPNT/NM\_001033047.2/610306
- NPNT/NM\_001184693.1/610306
- NPNT/NM\_001184691.1/610306
- NPNT/NM\_001184690.1/610306
- LOC101929577/NR\_125928.1/
- TBCK/NM\_001290768.1/616899
- TBCK/NM\_001163435.2/616899
- TBCK/NM\_001163437.2/616899
- TBCK/NM\_033115.4/616899
- TBCK/NM\_001163436.2/616899
- AIMP1/NM\_001142415.1/603605
- AIMP1/NM\_004757.3/603605
- AIMP1/NM\_001142416.1/603605
- GIMD1/NM\_001195138.1/
- DKK2/NM\_014421.2/605415
- PAPSS1/NM\_005443.4/603262

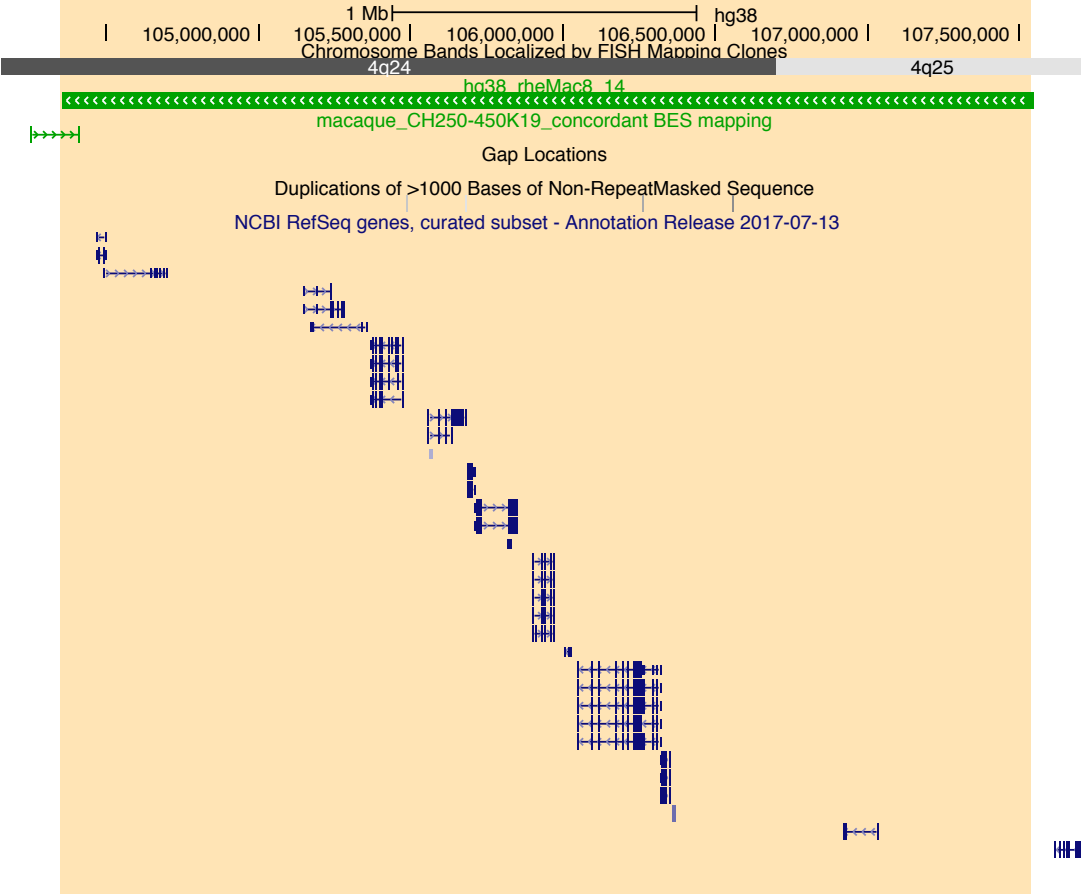



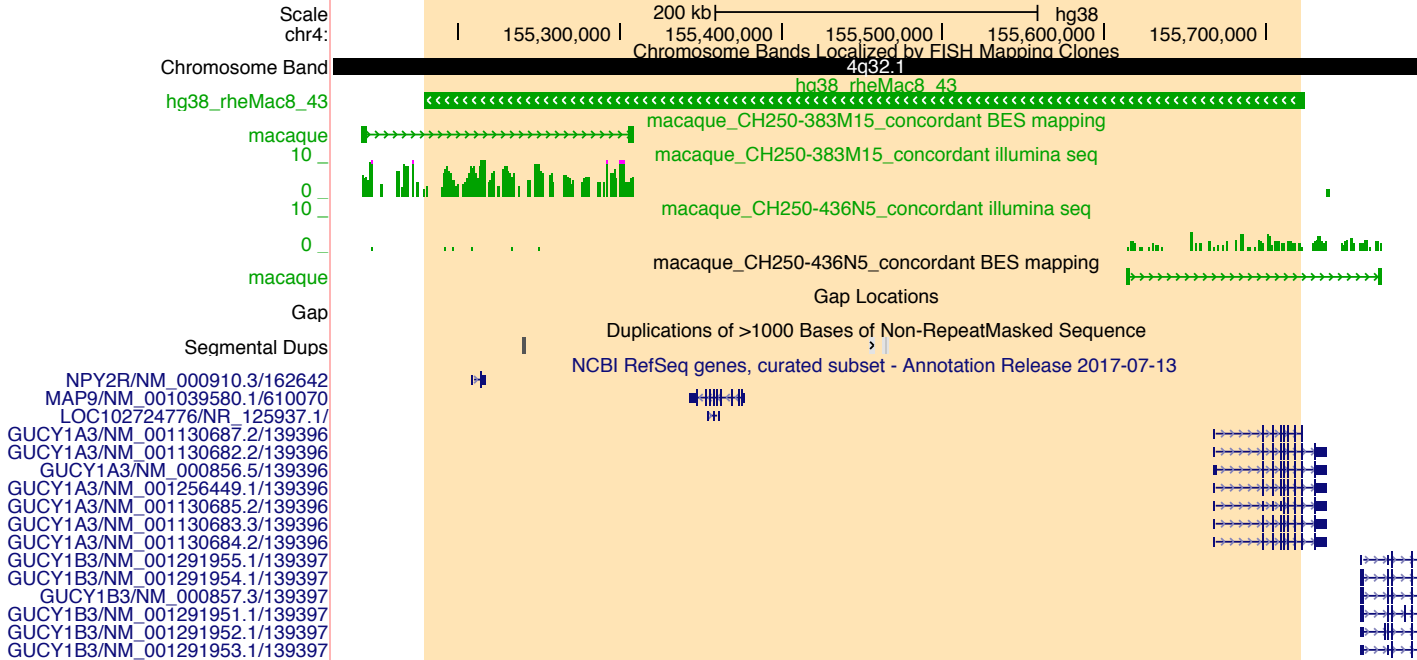

Scale  
chr4:

80,900,000 |

100 kb |

81,000,000 |

81,100,000 |

hg38

81,200,000 |

Chromosome Bands Localized by FISH Mapping Clones

Chromosome Band

4q21.21

hg38\_rheMac8\_59

hg38\_rheMac8\_59

macaque

macaque\_CH250-399L19\_concordant BES mapping

macaque

macaque\_CH250-326I9\_concordant BES mapping

Gap

Gap Locations

Duplications of >1000 Bases of Non-RepeatMasked Sequence

Segmental Dups

NCBI RefSeq genes, curated subset - Annotation Release 2017-07-13

C4orf22/NM\_152770.2/

C4orf22/NM\_001206997.1/

BMP3/NM\_001201.2/112263

PRKG2/NM\_001282480.1/601591

PRKG2/NM\_001282481.1/601591

PRKG2/NM\_001282483.1/601591

PRKG2/NM\_001282482.1/601591

PRKG2/NM\_006259.2/601591

PRKG2/NM\_001282485.1/601591

LOC101928942/NR\_125908.1/

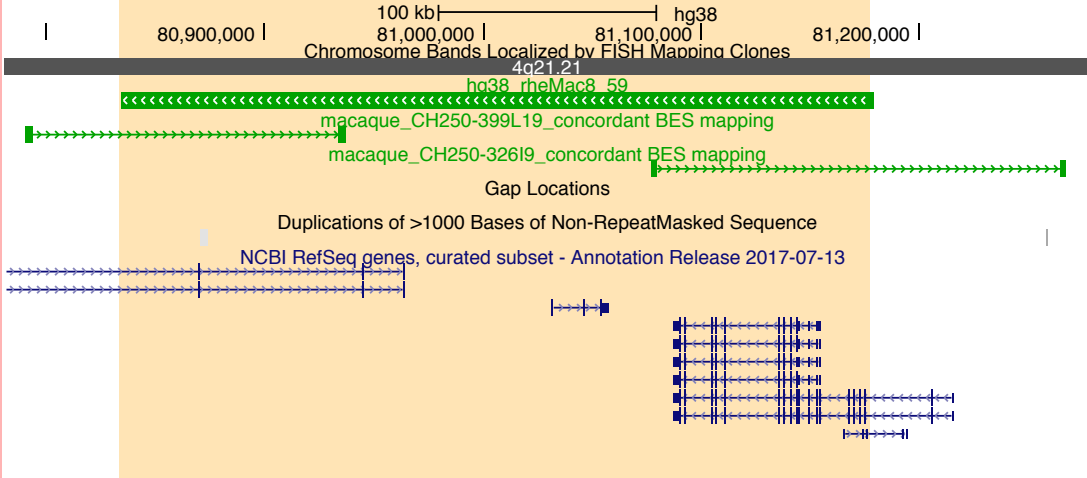

Scale  
chr4:

178,200,000 | 100 kb | 178,300,000 | 178,400,000 | hg38

Chromosome Bands Localized by FISH Mapping Clones

4q34.3

hg38\_rheMac8\_96

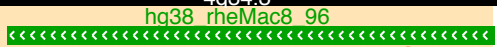

chimp

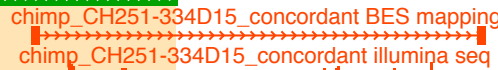

gorilla

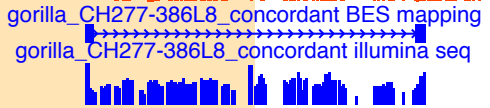

orang

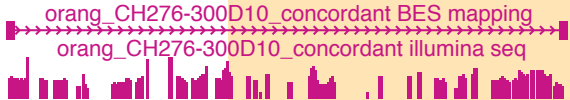

macaque

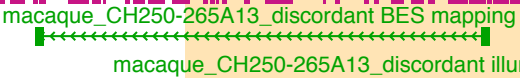

marmoset

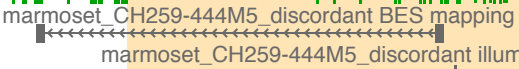

Gap

Gap Locations

Segmental Dups

Duplications of >1000 Bases of Non-RepeatMasked Sequence

NCBI RefSeq genes, curated subset - Annotation Release 2017-07-13

Scale  
chr5:

99,500,000 |

500 kb |

100,000,000 |

hg38

100,500,000 |

Chromosome Bands I localized by FISH Mapping Clones

5q21.1

hg38\_panTro5\_60  
hg38\_panTro5\_38  
hg38\_ponAbe2\_24  
hg38\_rheMac8\_32  
chimp  
chimp  
gorilla  
orang  
macaque  
macaque  
Gap  
Segmental Dups  
CTD-2151A2.1  
LOC100133050  
FAM174A

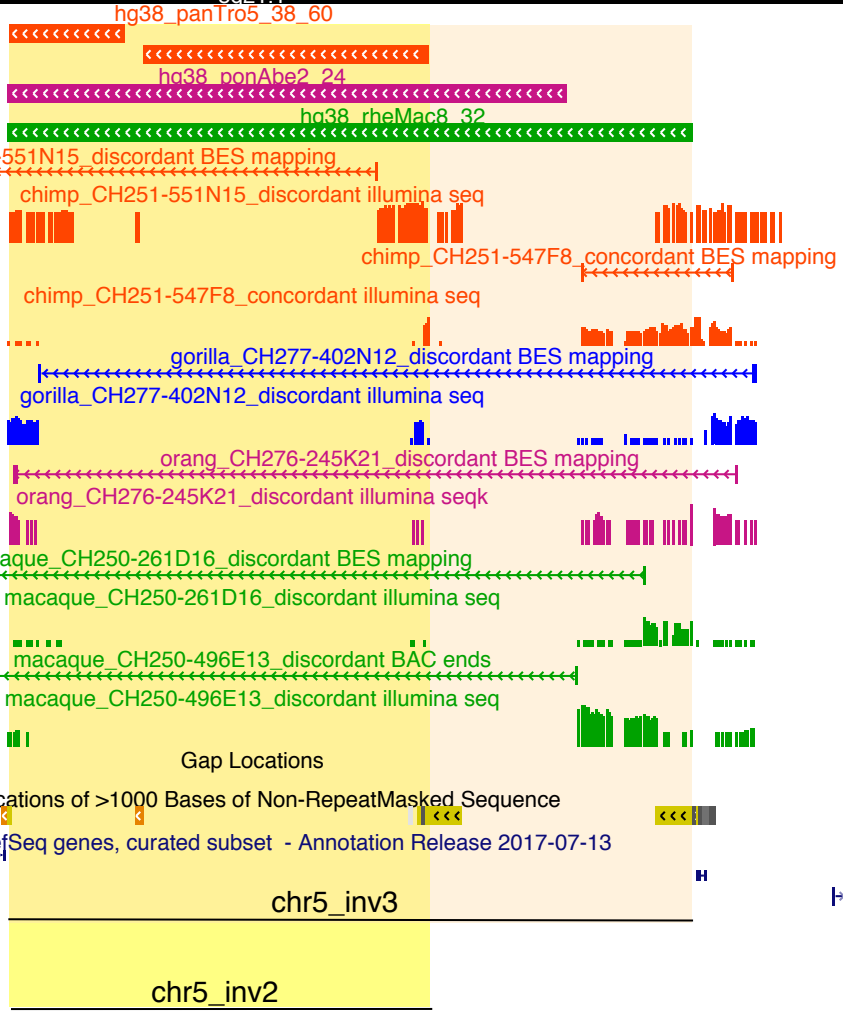

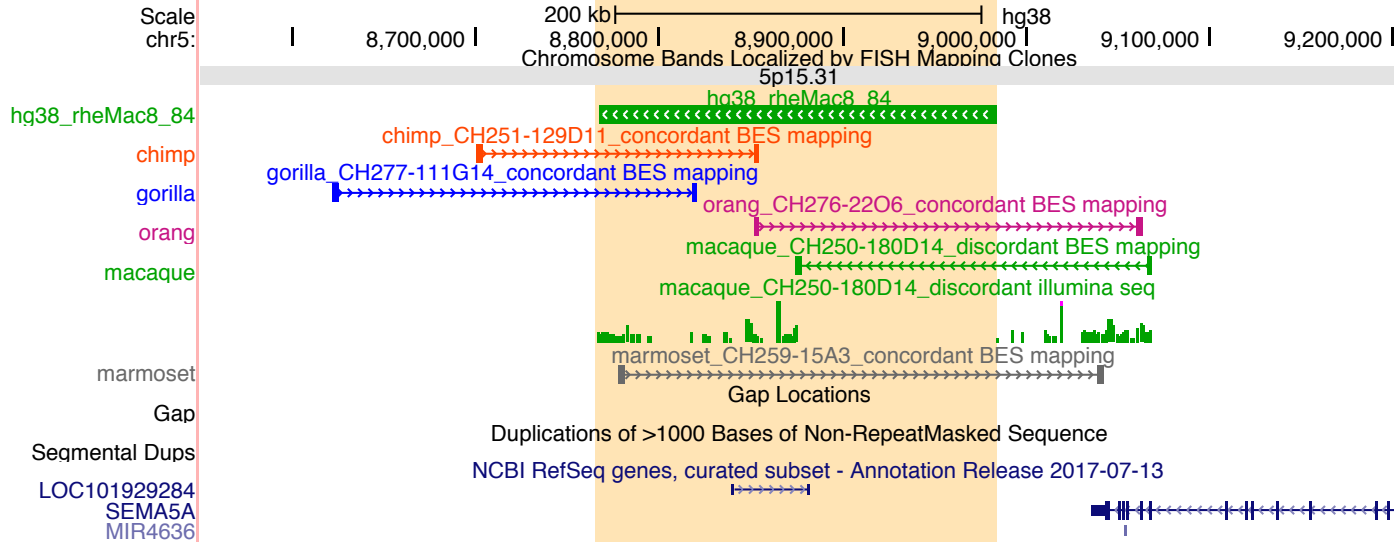

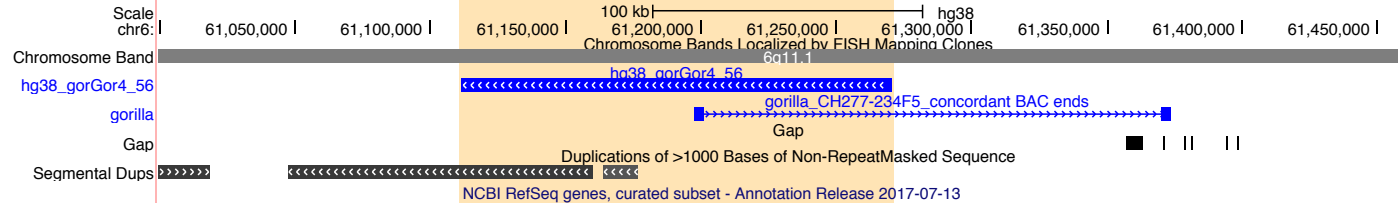

Scale chr7: 14,000,000 | 15,000,000 | 16,000,000 | 17,000,000 | 18,000,000 | 19,000,000 | hg38  
2 Mb | FISH Mapping Clones

Chromosome Band 7p21.3 | 7p21.2 | 7p21.1

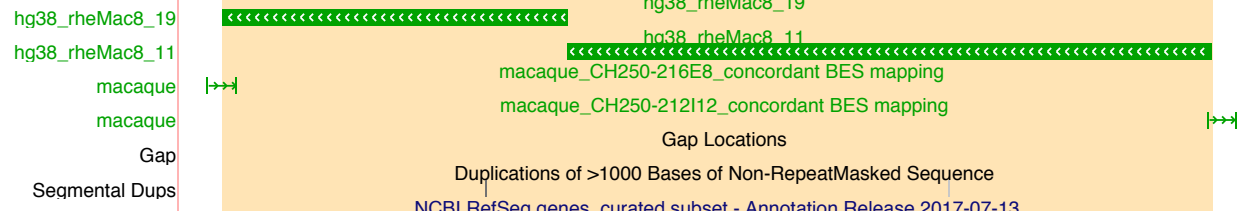

Duplications of >1000 Bases of Non-RepeatMasked Sequence  
NCBI RefSeq genes, curated subset - Annotation Release 2017-07-13

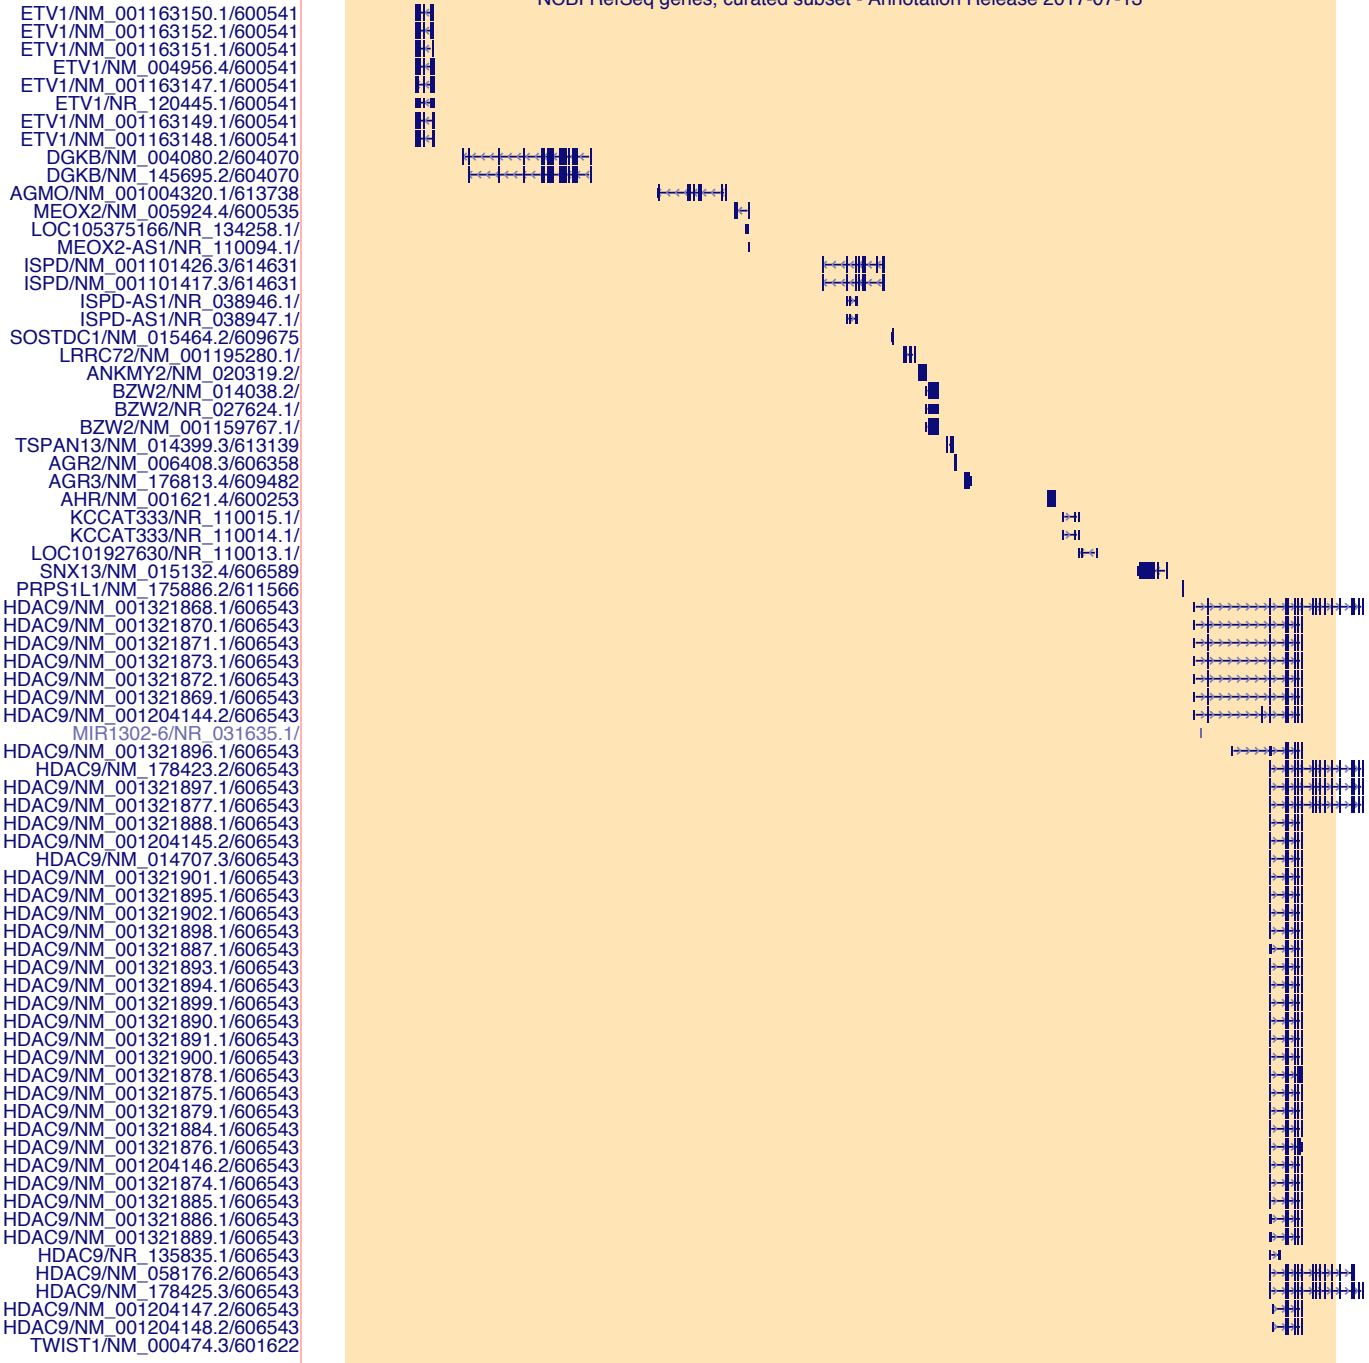

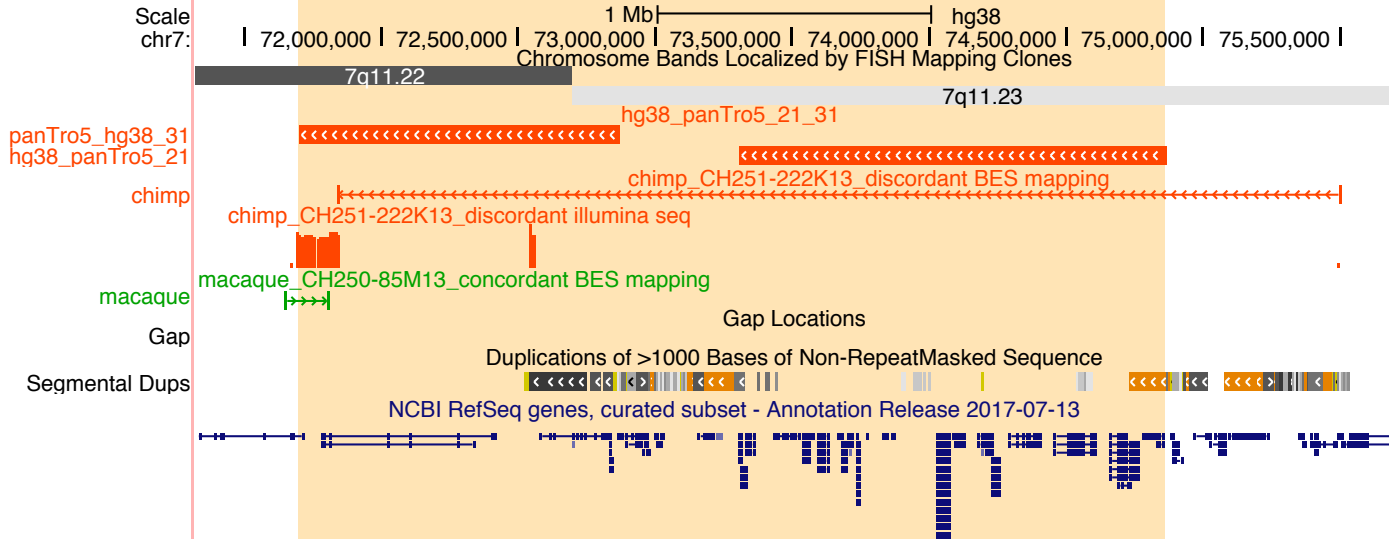



Scale chr22: 32,100,000 | 100 kb | 32,150,000 | 32,200,000 | hg38 32,250,000 |

Chromosome Band 22q12.3

hg38\_rheMac8\_118

macaque macaque CH250-530L10 concordant BES mapping

Gap Gap Locations

Segmental Dups Duplications of >1000 Bases of Non-RepeatMasked Sequence

NCBI RefSeq genes, curated subset - Annotation Release 2017-07-13

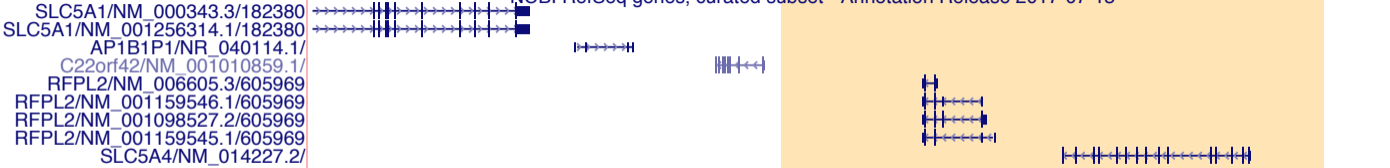

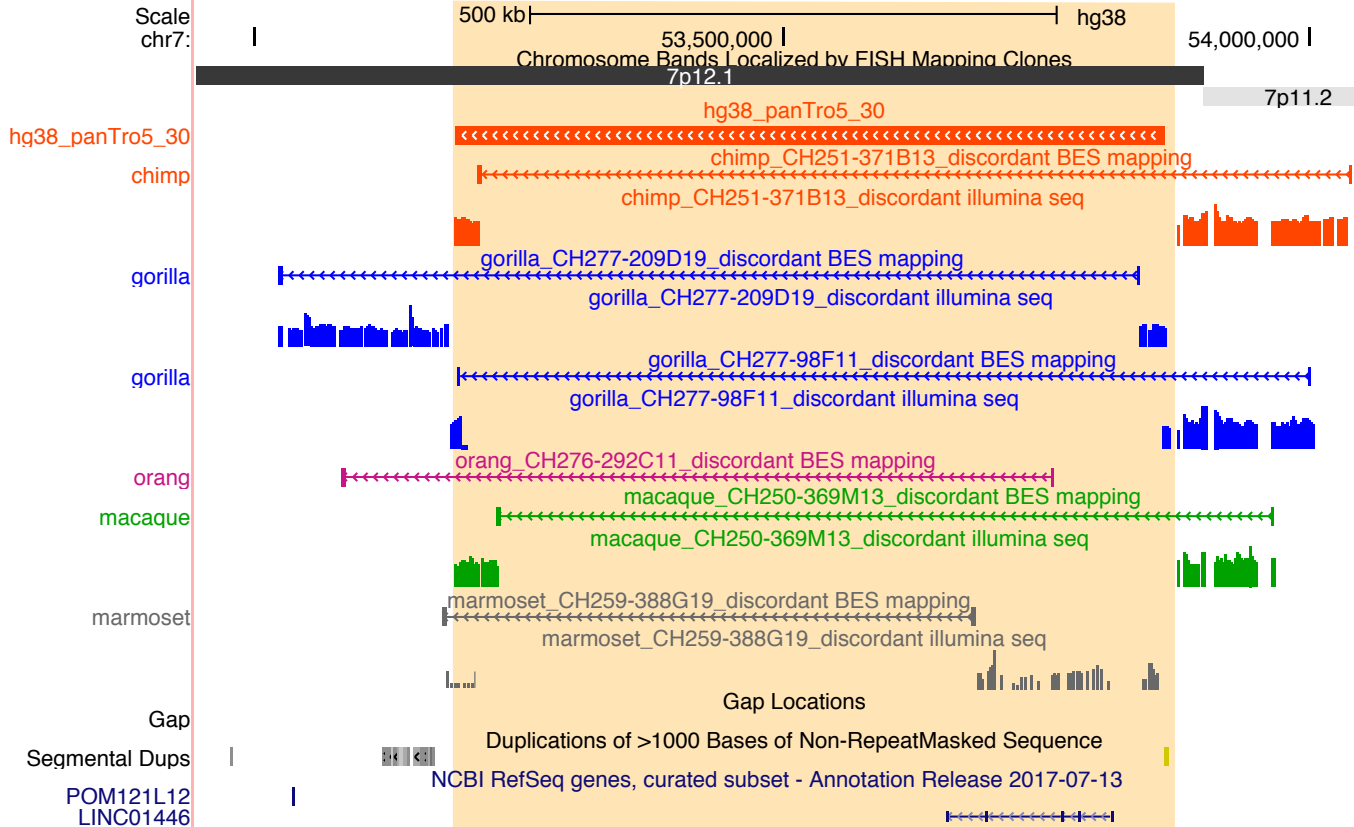

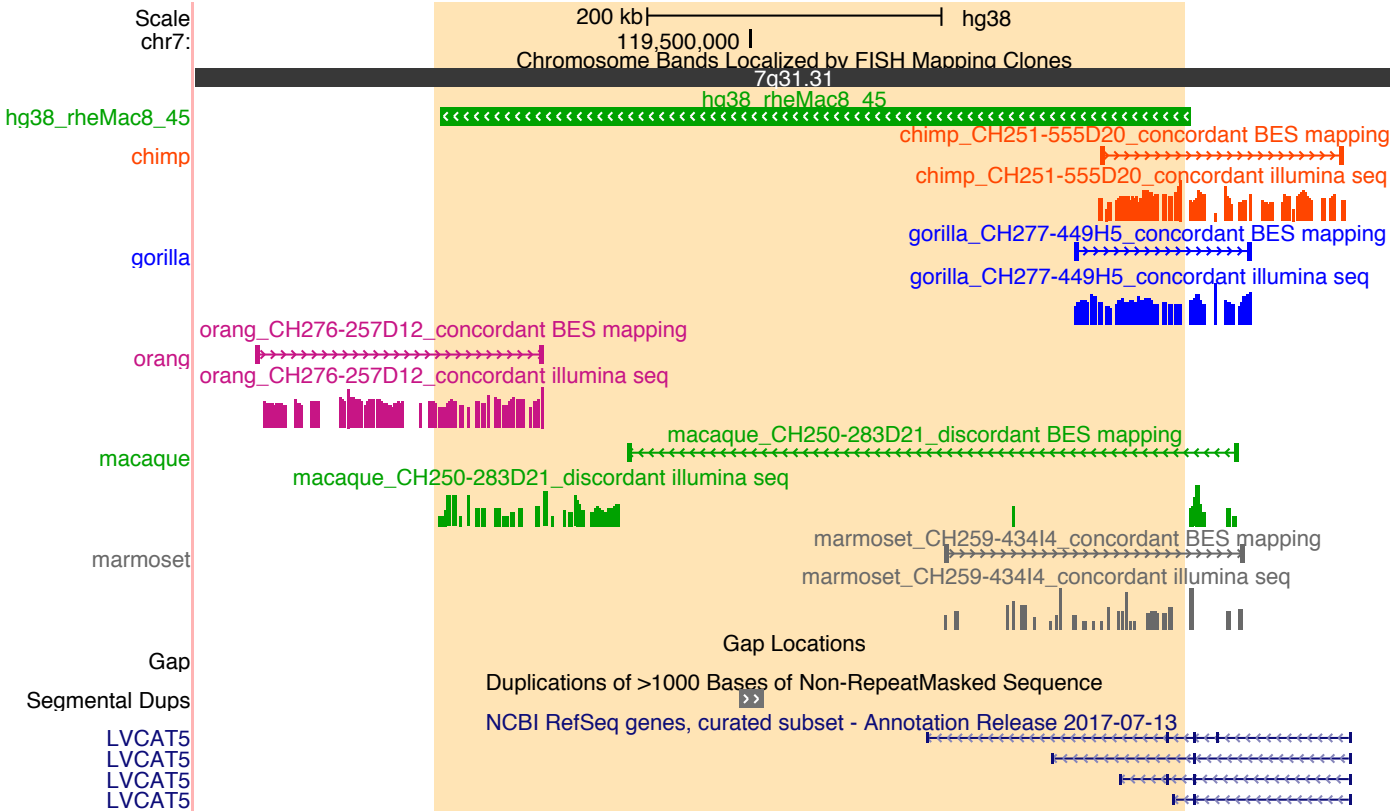

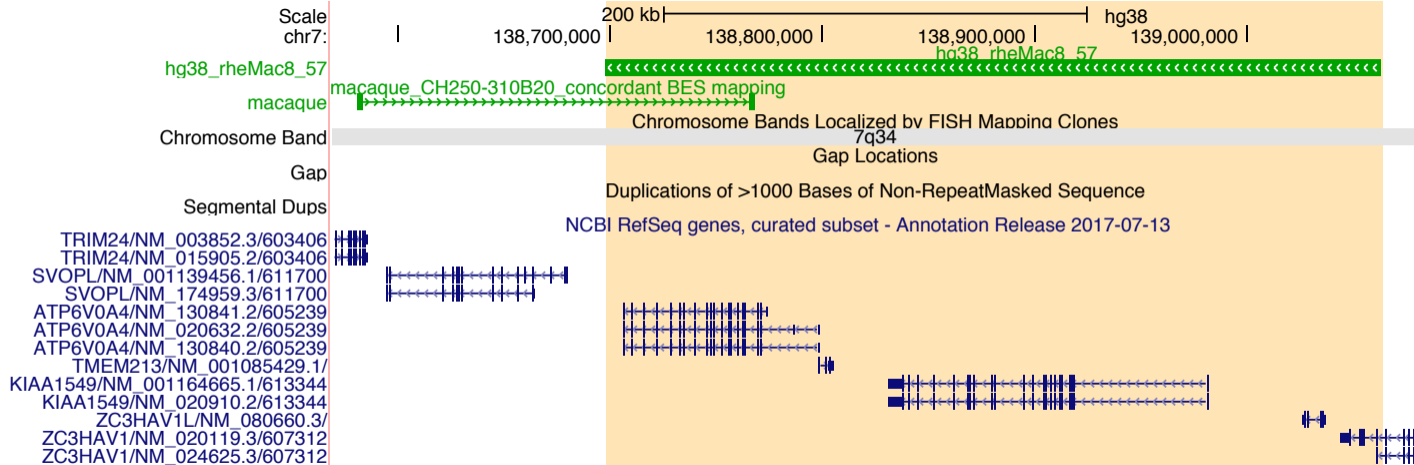

Scale  
chr7:

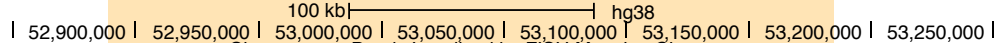

Chromosome Bands Localized by FISH Mapping Clones

Chromosome Band

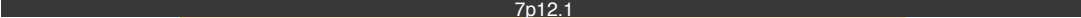

hg38\_rheMac8\_68

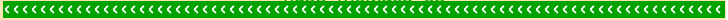

macaque

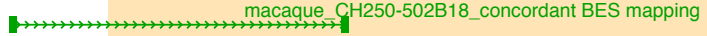

macaque

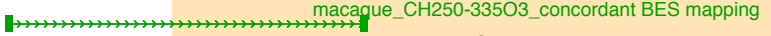

Gap

Gap Locations

Segmental Dups

Duplications of >1000 Bases of Non-RepeatMasked Sequence

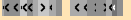

NCBI RefSeq genes, curated subset - Annotation Release 2017-07-13

POM121L12/NM\_182595.3/

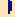

Scale chr7: | 850,000 | 100 kb | 900,000 | 950,000 | 1,000,000 | hg38 | 1,050,000 |

Chromosome Bands Localized by FISH Mapping Clones

Chromosome Band

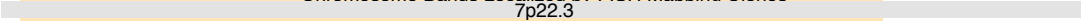

hg38 panTro5 TOP\_36

hg38\_panTro5\_TOP\_36

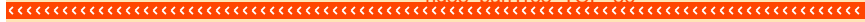

chimp\_CH251-297P2\_concordant BES mapping

chimp

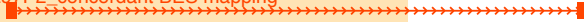

Gap Locations

Gap

Duplications of >1000 Bases of Non-RepeatMasked Sequence

Segmental Dups

NCBI RefSeq genes, curated subset - Annotation Release 2017-07-13

- SUN1/NM\_001171946.1/607723
- SUN1/NM\_001171945.1/607723
- SUN1/NM\_025154.5/607723
- SUN1/NM\_001171944.1/607723
- SUN1/NM\_001130965.2/607723
- GET4/NM\_015949.2/612056
- ADAP1/NM\_001284311.1/608114
- ADAP1/NM\_001284310.1/608114
- ADAP1/NM\_001284309.1/608114
- ADAP1/NM\_006869.3/608114
- ADAP1/NM\_001284308.1/608114
- COX19/NM\_001031617.2/610429
- CYP2W1/NM\_017781.2/615967
- C7orf50/NM\_001318252.1/
- C7orf50/NR\_134537.1/
- C7orf50/NM\_032350.5/
- C7orf50/NM\_001134395.1/
- C7orf50/NM\_001134396.1/
- MIR339/NR\_029898.1/615977
- C7orf50/NR\_134538.1/
- GPR146/NM\_001303473.1/
- GPR146/NM\_138445.3/
- GPR146/NM\_001303474.1/

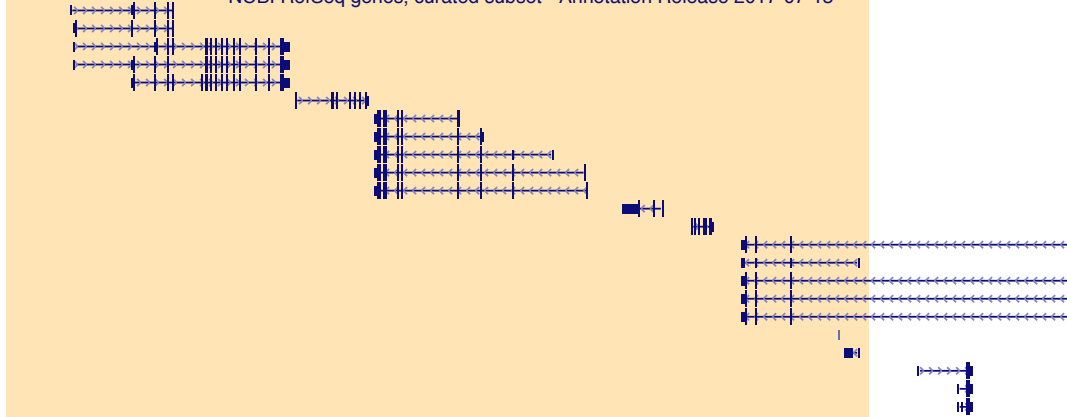

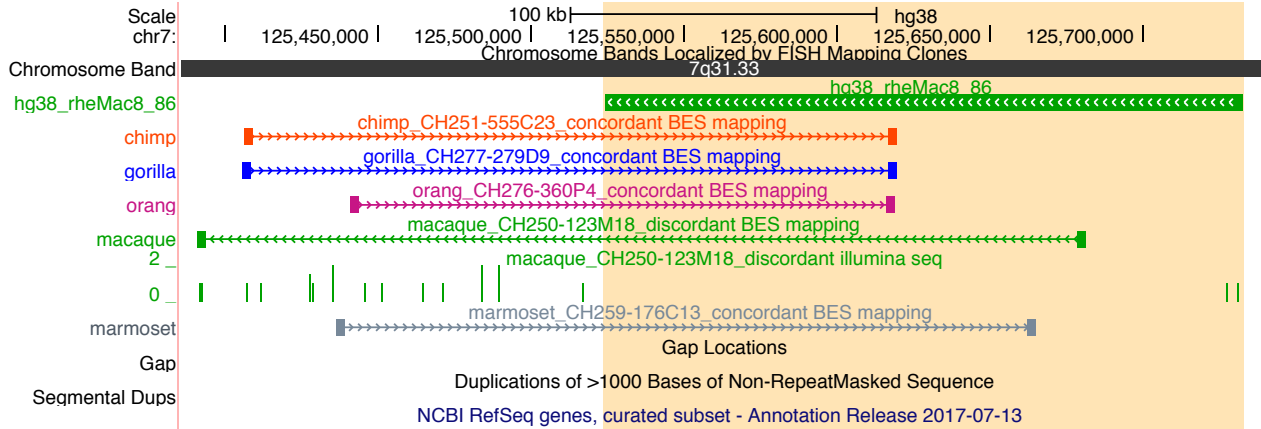

Scale chr7: | 2,450,000 | 2,500,000 | 2,550,000 | 2,600,000 | 2,650,000 | 2,700,000 | 2,750,000 | 2,800,000 | hg38

Chromosome Bands Localized by FISH Mapping Clones  
7p22.3

hg38\_rheMac8\_101

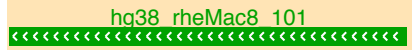

chimp\_CH251-294P16\_concordant BES mapping

chimp

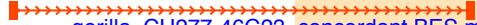

gorilla

gorilla\_CH277-46C23\_concordant BES mapping

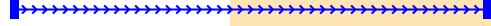

orang

orang\_CH276-266M8\_discordant BES mapping

orang\_CH276-266M8\_discordant illumina seq

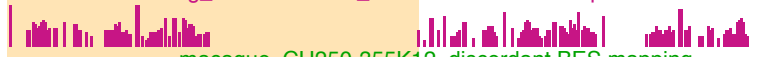

macaque

macaque\_CH250-355K12\_discordant BES mapping

macaque\_CH250-355K12\_discordant illumina seq

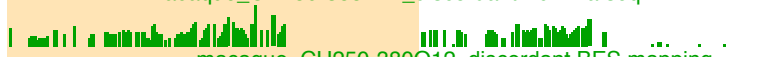

macaque

macaque\_CH250-380O12\_discordant BES mapping

macaque\_CH250-380O12\_discordant illumina seq

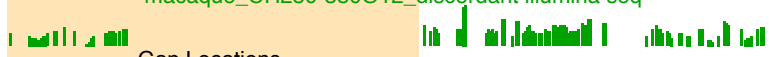

Gap Locations

Gap

Duplications of >1000 Bases of Non-RepeatMasked Sequence

Segmental Dups

NCBI RefSeq genes, curated subset - Annotation Release 2017-07-13

CHST12  
CHST12  
CHST12  
LOC101927181

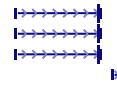

GRIFIN

LFNG

IQCE

AMZ1

AMZ1

LFNG

IQCE

AMZ1

LFNG

IQCE

AMZ1

MIR46481

IQCE

AMZ1

GNA12

GNA12

GNA12

GNA12

BRAT1

TTYH3

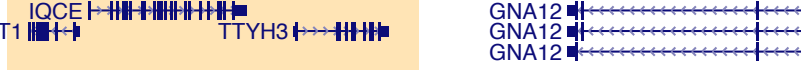



Scale chr8: | 51,000,000 | 51,500,000 | 52,000,000 | 52,500,000 | 53,000,000 | 53,500,000 | hg38

Chromosome Bands 8q11.21 8q11.22 8q11.23

hg38\_rheMac8\_12

macaque macaque\_CH250-400A18\_concordant BES mapping

macaque macaque\_CH250-426N6\_concordant BES mapping

Gap Gap Locations

Duplications of >1000 Bases of Non-RepeatMasked Sequence

Segmental Dups

NCBI RefSeq genes, curated subset (NM\_\*, NR\_\*, and YP\_\*) - Annotation Release 2017-07-13

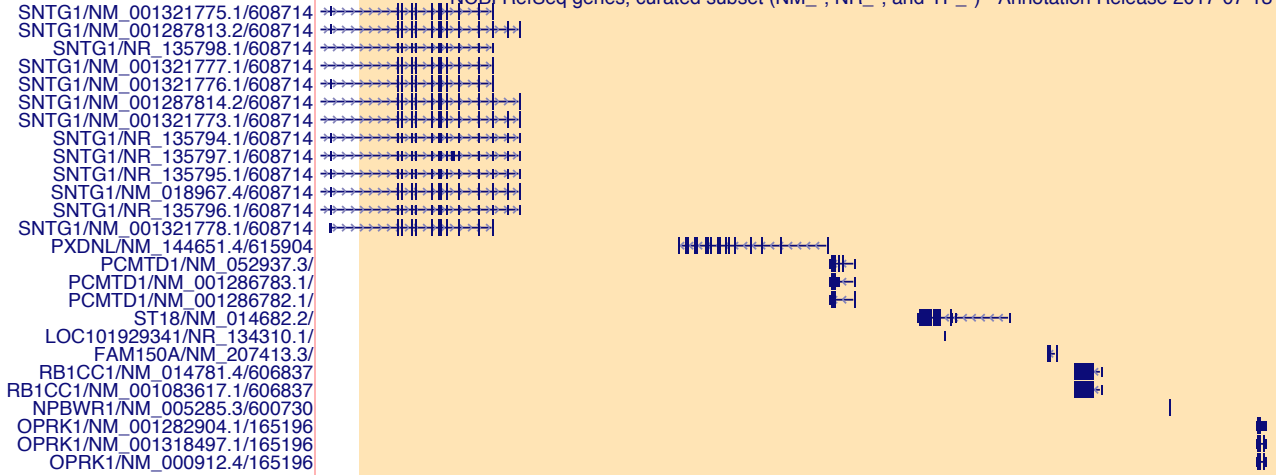

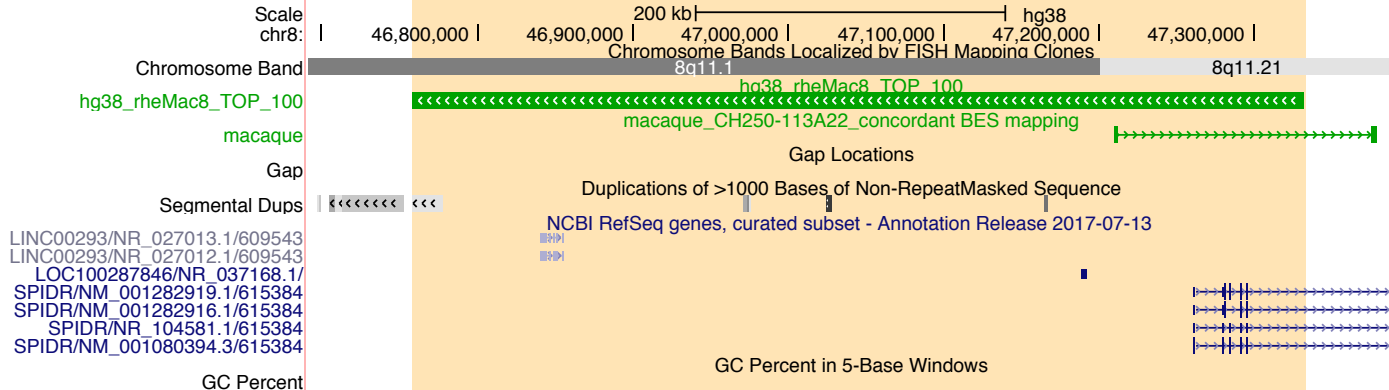

Scale chr9: | 24,350,000 | 24,400,000 | 24,450,000 | 24,500,000 | 24,550,000 | 24,600,000 | 24,650,000 | 24,700,000 | hg38

Chromosome Bands Localized by FISH Mapping Clones

9p21.3

hg38\_rheMac8\_107

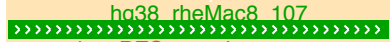

chimp

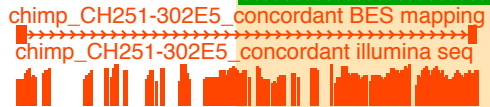

gorilla

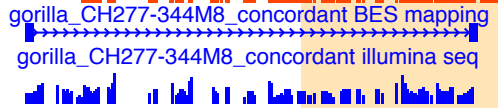

orang

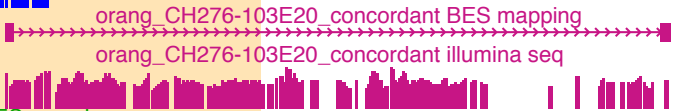

macaque

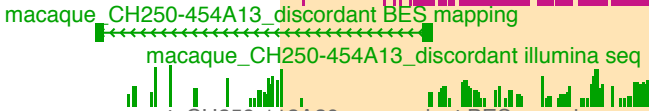

marmoset

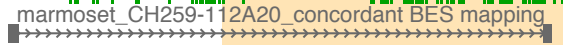

Gap

Gap Locations

Segmental Dups

Duplications of >1000 Bases of Non-RepeatMasked Sequence

IZUMO3

NCBI RefSeq genes, curated subset - Annotation Release 2017-07-13

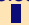

Scale chr10: | 106,000,000 | 106,500,000 | 107,000,000 | 107,500,000 | hg38

1 Mb

Chromosome Bands Localized by FISH Mapping Clones

Chromosome Band

10q25.1

hg38\_rheMac8\_16

hg38\_rheMac8\_16

macaque

macaque\_CH250-216G12\_concordant BES mapping

macaque

macaque\_CH250-437D12\_concordant BES mapping

Gap Locations

Gap

Duplications of >1000 Bases of Non-RepeatMasked Sequence

Segmental Dups

NCBI RefSeq genes, curated subset (NM\_\*, NR\_\*, and YP\_\*) - Annotation Release 2017-07-13

- LOC101927549/NR\_120625.1/
- LOC105378470/NR\_134330.1/
- LOC105378470/NR\_134331.1/
- LOC105378470/NR\_134329.1/
- SORCS1/NM\_001206572.1/606283
- SORCS1/NM\_001013031.2/606283
- SORCS1/NM\_052918.4/606283
- SORCS1/NM\_001206570.1/606283
- SORCS1/NM\_001206571.1/606283
- SORCS1/NM\_001206569.1/606283
- LINC01435/NR\_125760.1/

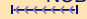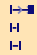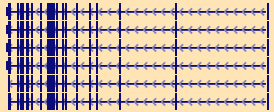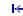



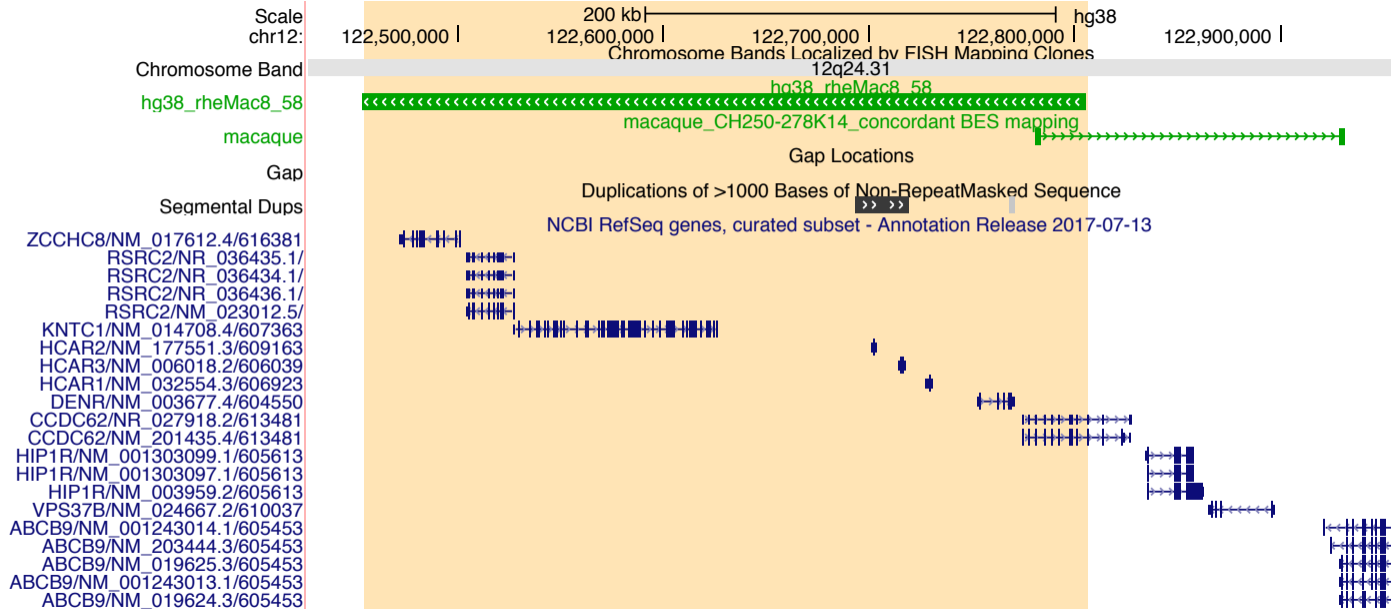

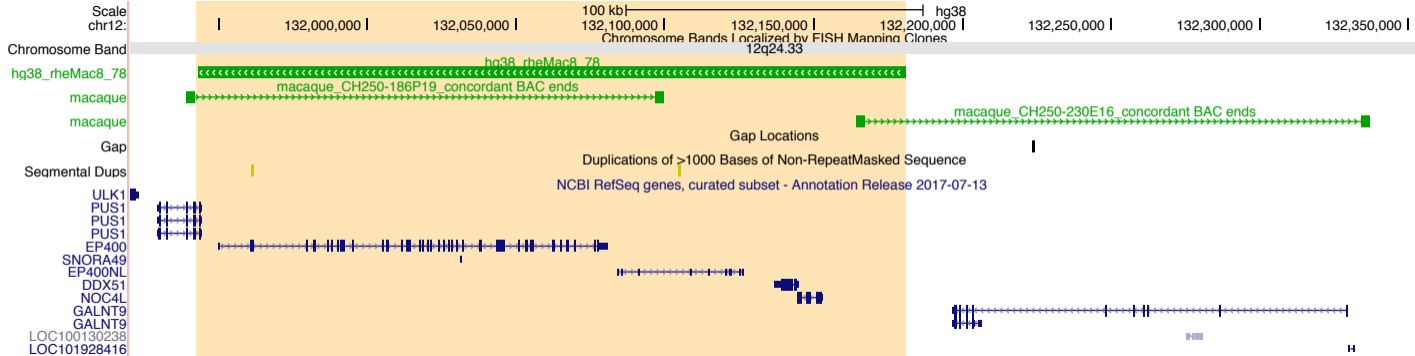

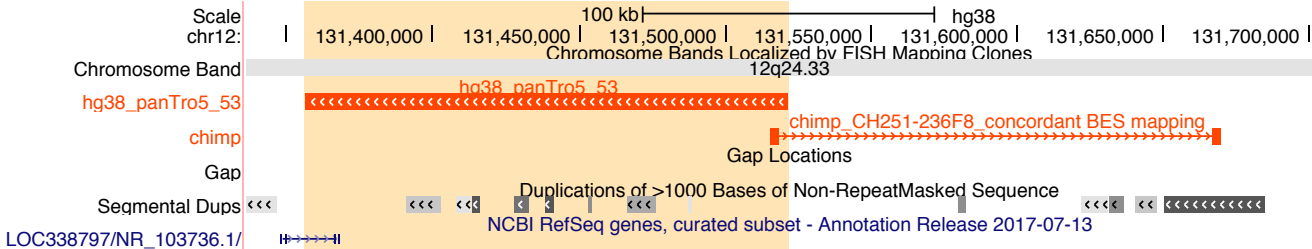



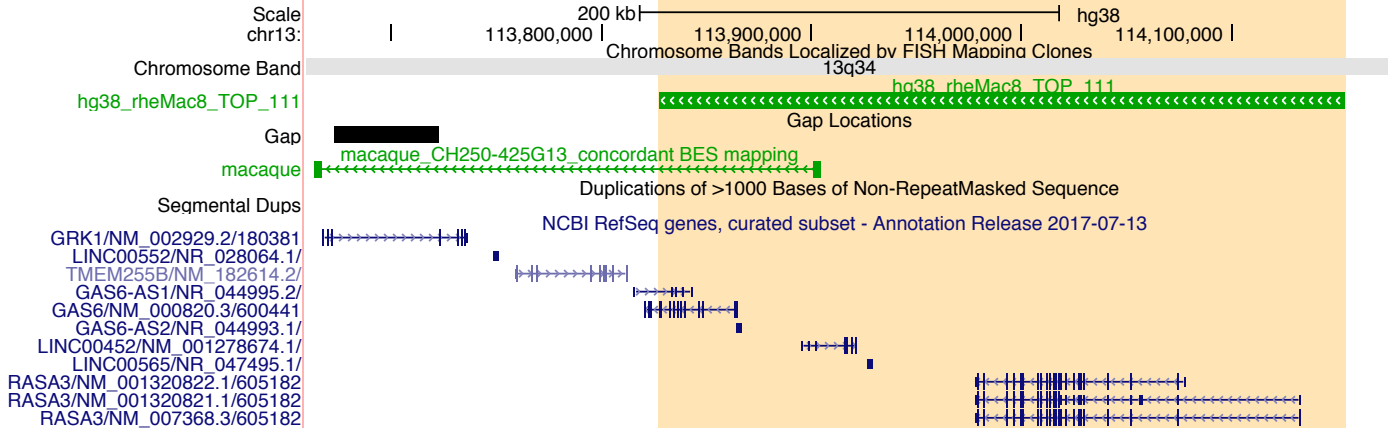

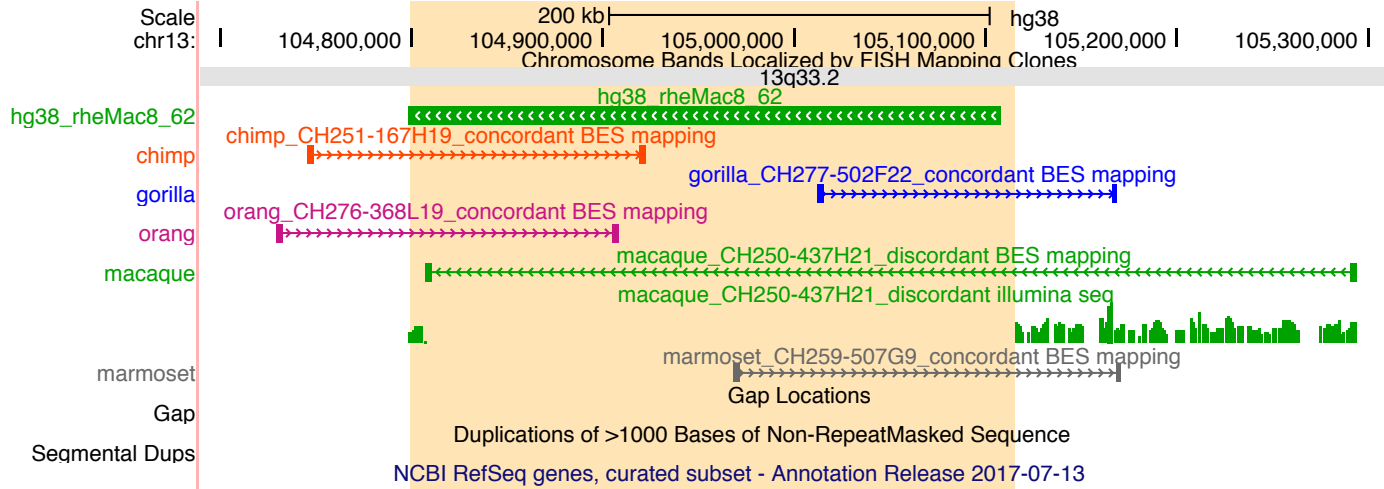

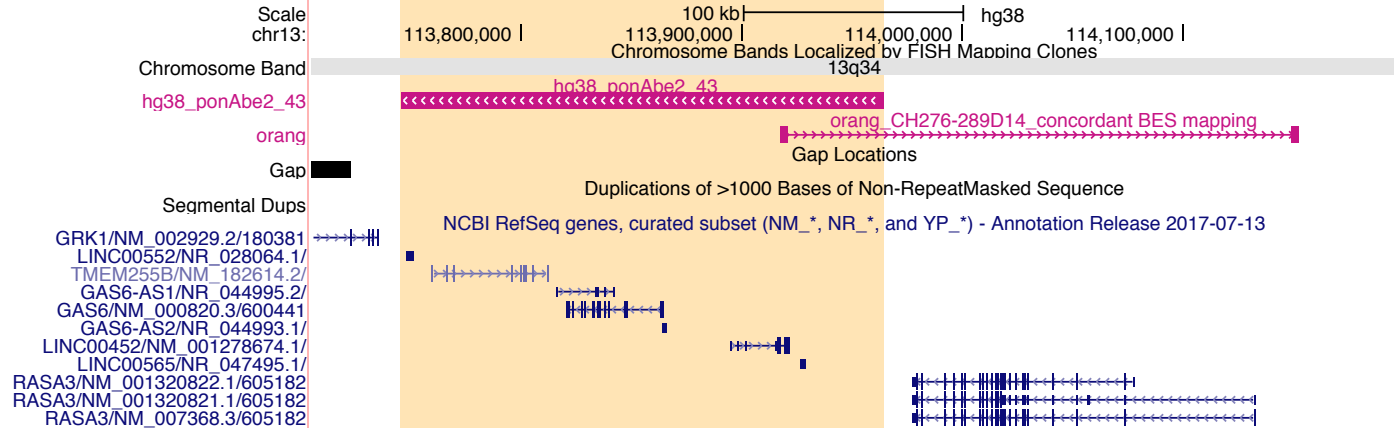

Scale chr14: | 19,800,000 | 19,900,000 | 20,000,000 | 20,100,000 | 20,200,000 | 20,300,000 | hg38

Chromosome Bands Localized by FISH Mapping Clones

14q11.2

hg38\_rheMac8\_TOP\_105

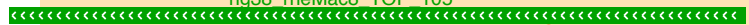

chimp

chimp\_CH251-328P13\_concordant\_BAC\_ends

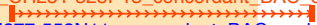

gorilla

gorilla\_CH277-552N11\_concordant\_BAC\_ends

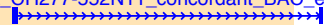

orang

orang\_CH276-409H20\_concordant\_BAC\_ends

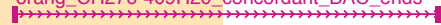

macaque

macaque\_CH250-392A15\_discordant\_BAC\_ends

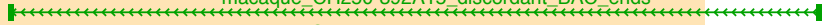

macaque\_CH250-392A15\_discordant illumina seq

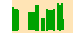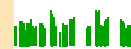

Segmental Dups

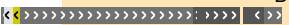

Duplications of >1000 Bases of Non-RepeatMasked Sequence

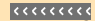

Gap

Gap Locations

NCBI RefSeq genes, curated subset - Annotation Release 2017-07-13

- OR11H2/NM\_001197287.1/
- OR4Q3/NM\_172194.1/
- OR4M1/NM\_001005500.1/
- OR4N2/NM\_001004723.2/
- OR4K2/NM\_001005501.1/
- OR4K5/NM\_001005483.1/
- OR4K1/NM\_001004063.2/
- OR4K15/NM\_001005486.1/
- OR4K14/NM\_001004712.1/
- OR4K13/NM\_001004714.1/
- OR4L1/NM\_001004717.1/
- OR4K17/NM\_001004715.1/
- OR4N5/NM\_001004724.1/
- OR11G2/NM\_001005503.1/
- OR11H6/NM\_001004480.1/
- OR11H4/NM\_001004479.1/
- TTC5/NM\_138376.2/
- CCNB1IP1/NM\_182852.3/608249
- CCNB1IP1/NM\_021178.4/608249
- CCNB1IP1/NM\_182849.2/608249
- SNORD126/NR\_003693.1/

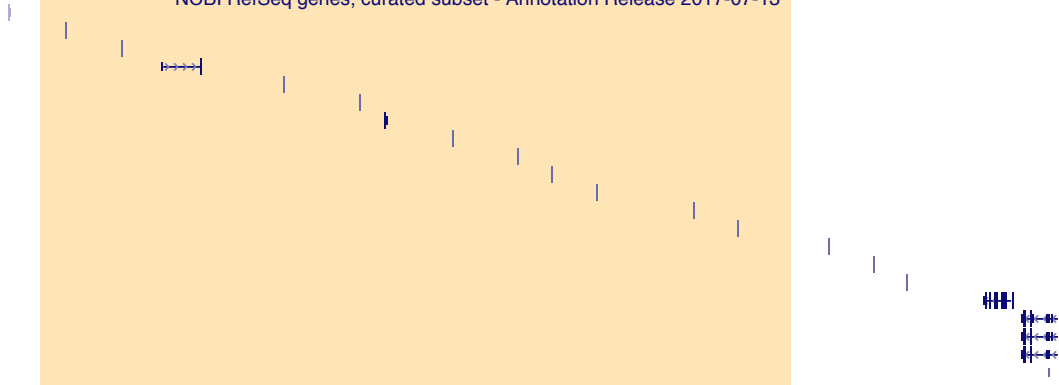

Scale chr15: 26,000,000 | 500 kb | 26,500,000 | hg38 27,000,000 |

Chromosome Band 15q12

hg38\_rheMac8\_35

hg38\_rheMac8\_52

macaque macaque\_CH250-336A11\_concordant BES mapping

Gap Locations

Duplications of >1000 Bases of Non-RepeatMasked Sequence

NCBI RefSeq genes, curated subset - Annotation Release 2017-07-13

ATP10A/NM\_024490.3/605855

MIR4715/NR\_039865.1/

LOC100128714/NR\_040082.1/

LINC00929/NR\_038851.1/

LINC00929/NR\_038852.1/

GABRB3/NM\_001191321.2/137192

GABRB3/NM\_001191320.1/137192

GABRB3/NM\_001278631.1/137192

GABRB3/NM\_000814.5/137192

GABRB3/NM\_021912.4/137192

GABRB3/NR\_103801.1/137192

GABRA5/NM\_000810.3/137142

GABRA5/NM\_001165037.1/137142

GABRG3/NM\_001270873.1/600233

GABRG3/NM\_033223.4/600233

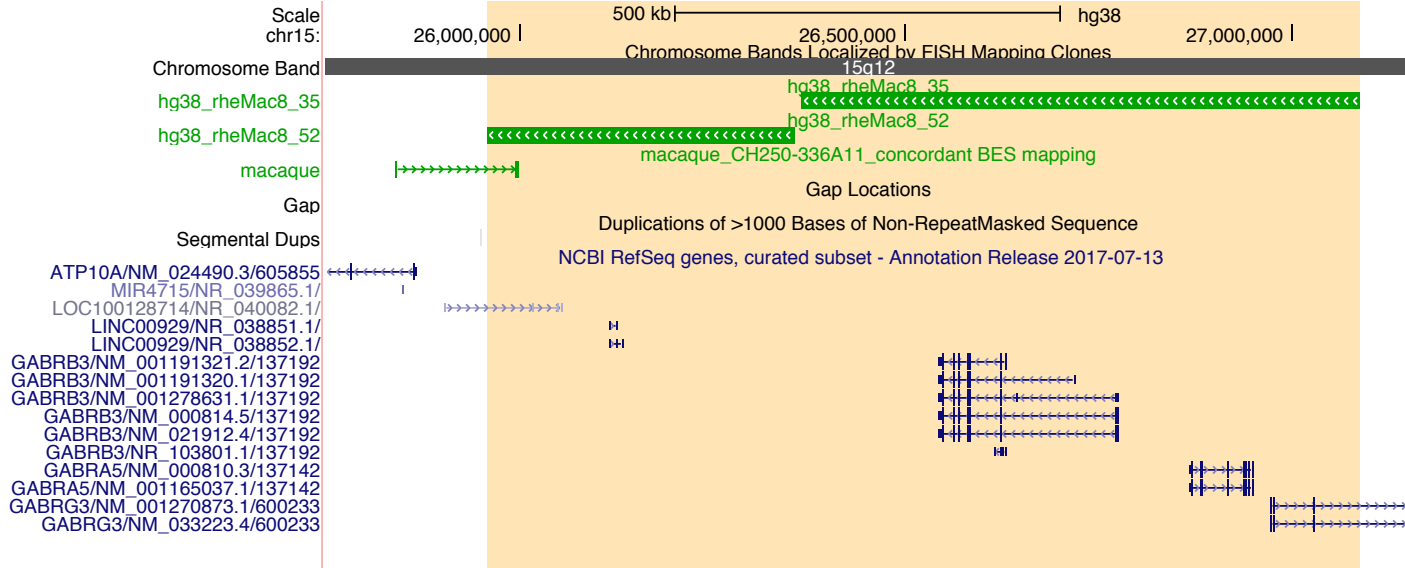

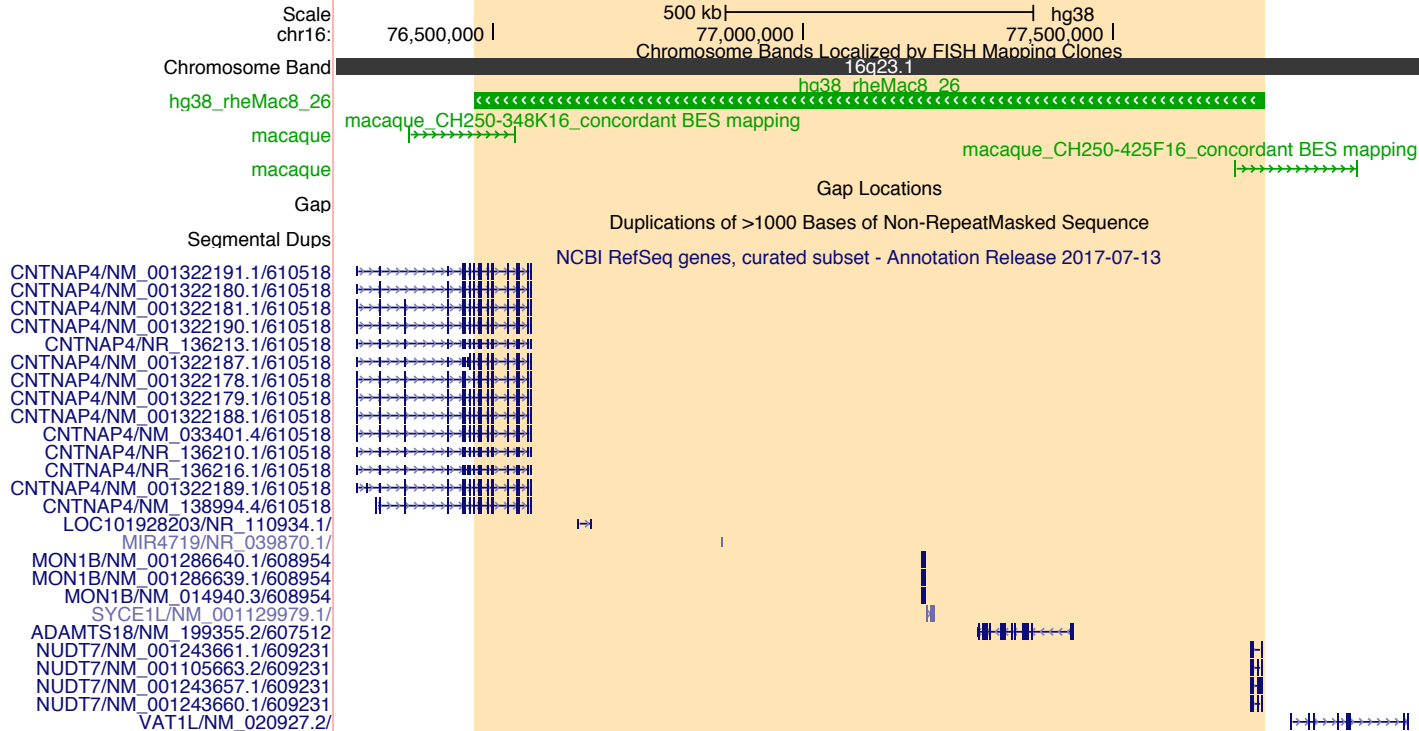

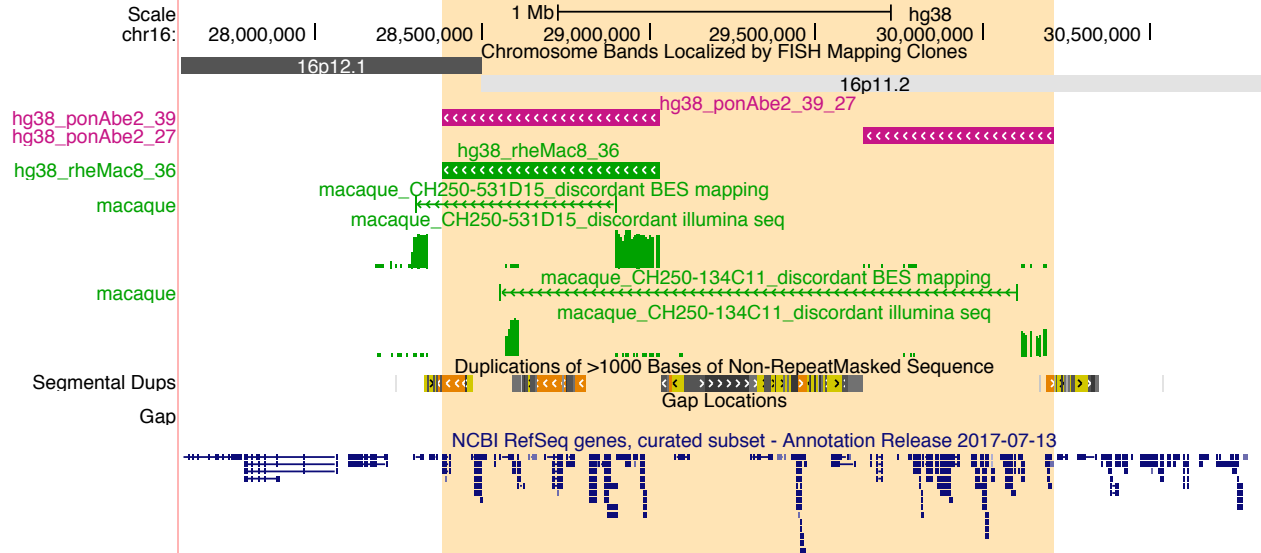

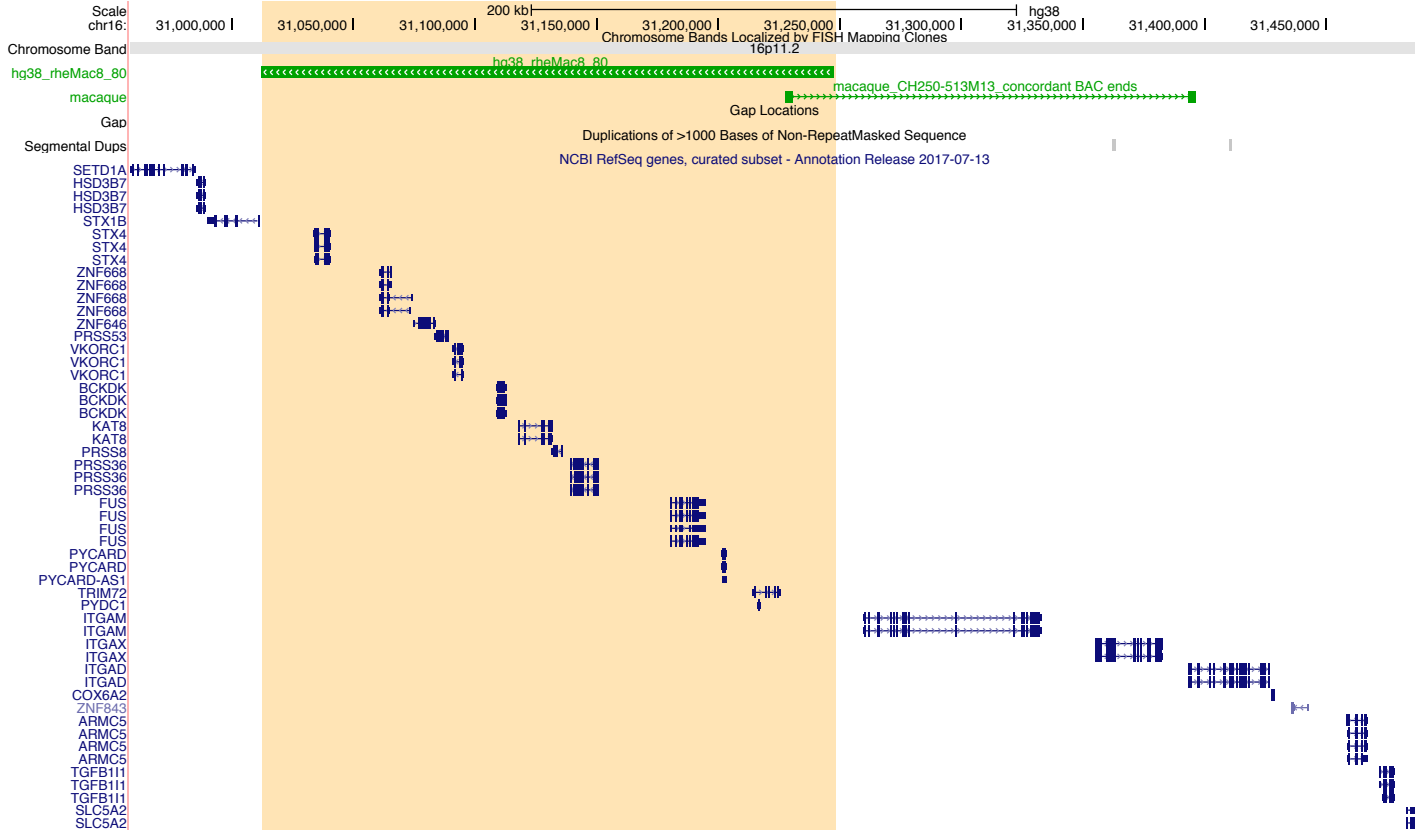



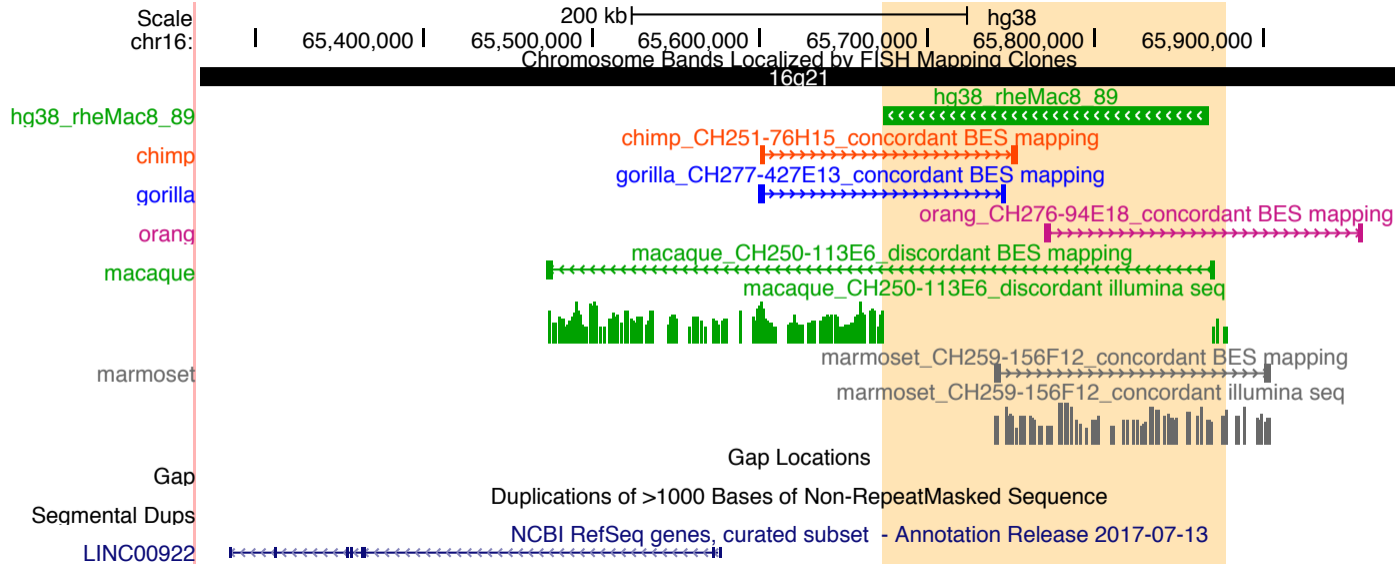

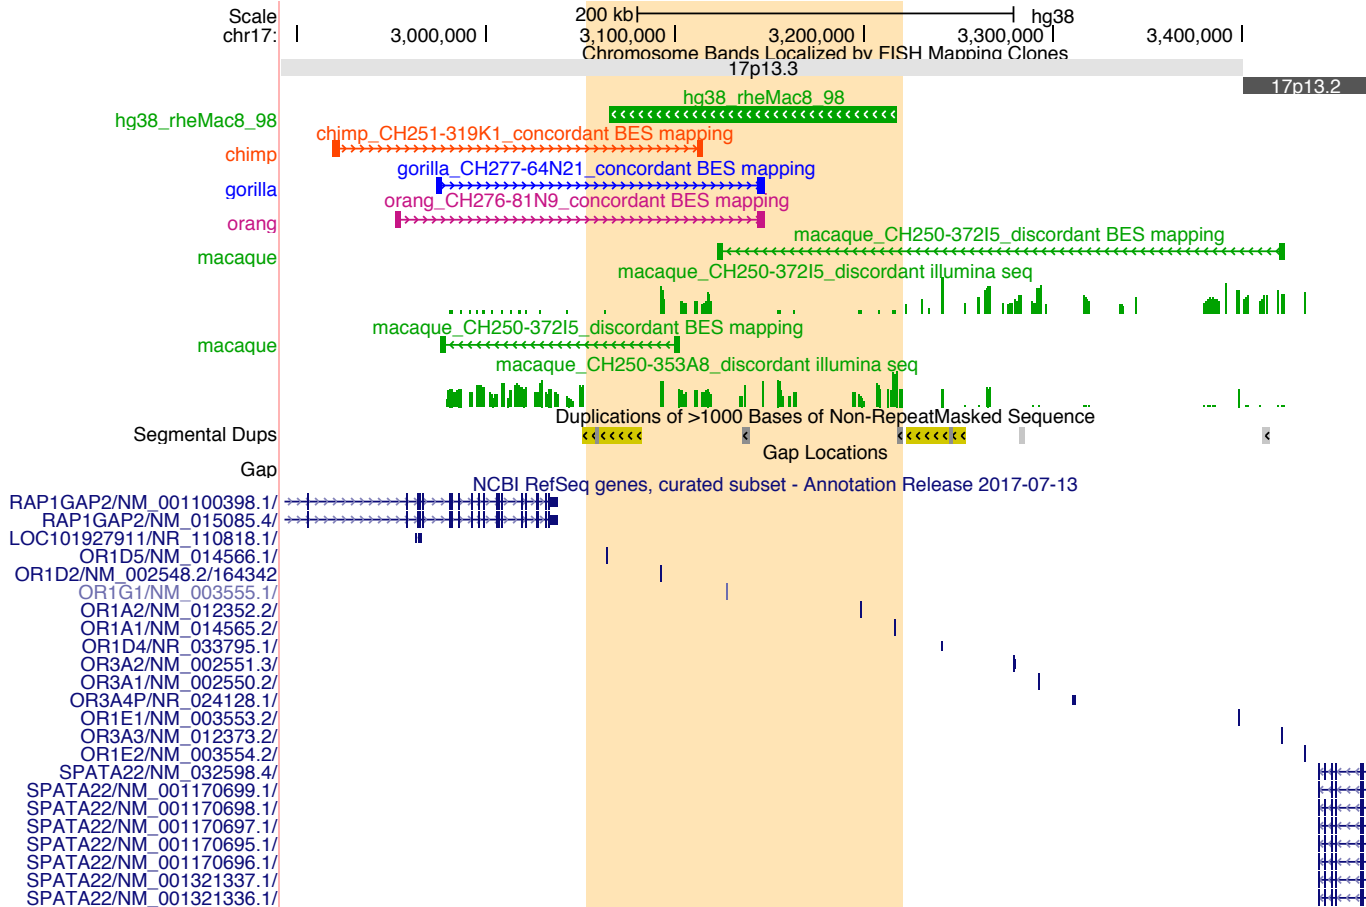

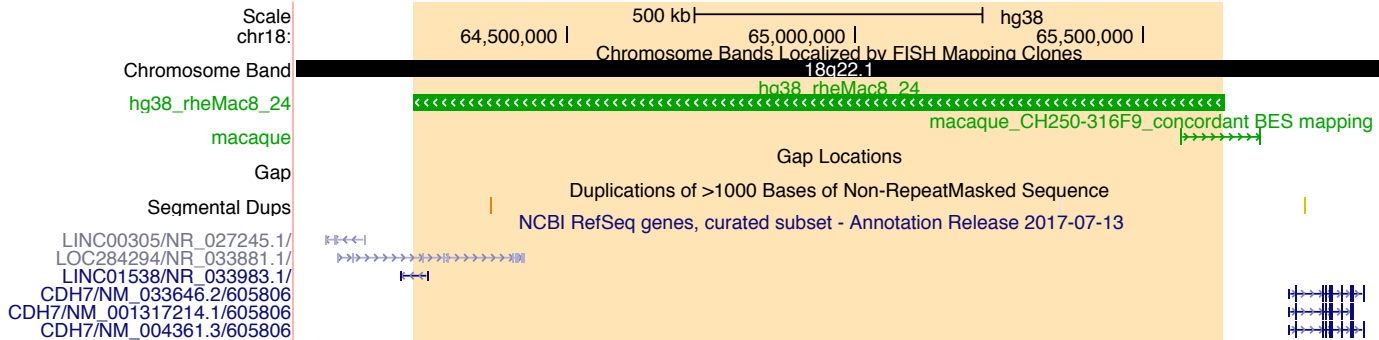

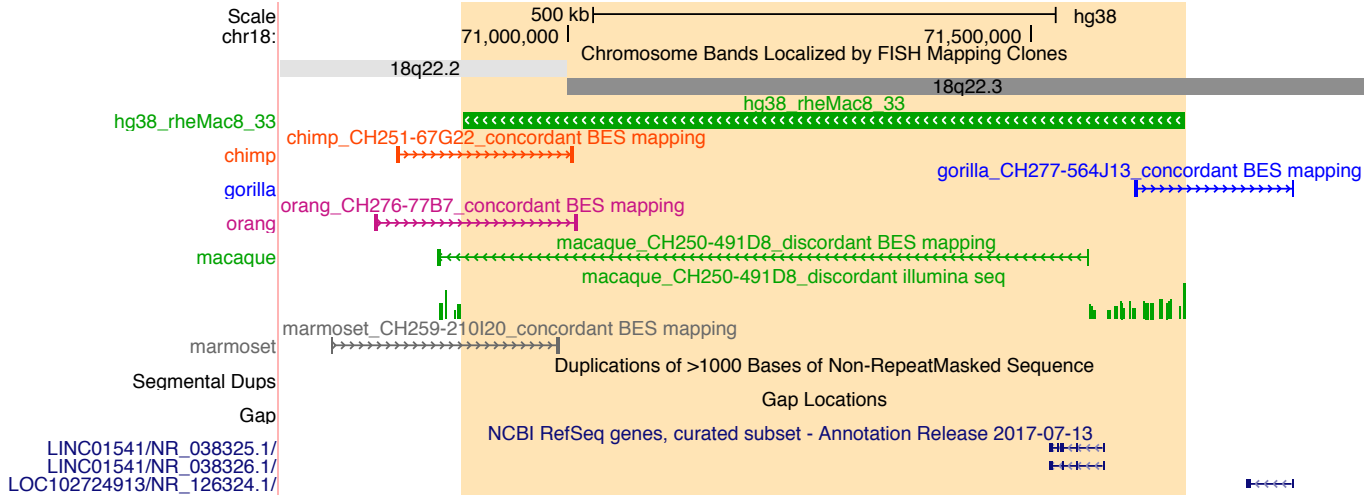

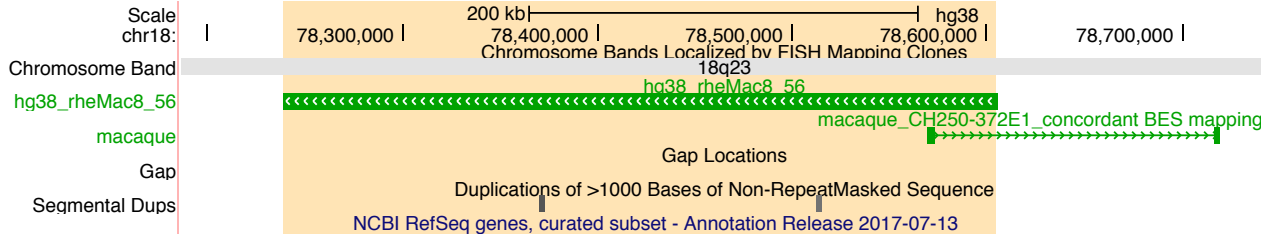

Scale chr18: | 68,200,000 | 200 kb | 68,300,000 | 68,400,000 | 68,500,000 | hg38 | 68,600,000 |

Chromosome Bands Localized by FISH Mapping Clones

18q22.1

hg38 rheMac8 69

hg38\_rheMac8\_69

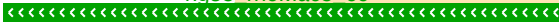

chimp CH251-168D14 concordant BES mapping

chimp

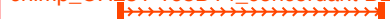

chimp CH251-168D14 concordant illumina seq

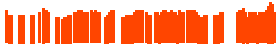

gorilla

gorilla CH277-477O5 concordant BES mapping

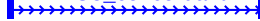

gorilla CH277-477O5 concordant illumina seq

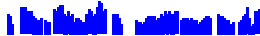

orang

orang CH276-35H16 concordant BES mapping

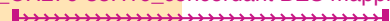

orang CH276-35H16 concordant illumina seq

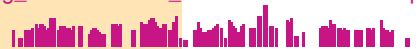

macaque

macaque CH250-208C9 discordant BES mapping

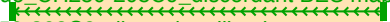

macaque CH250-208C9 discordant illumina seq

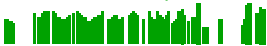

marmoset

marmoset CH259-409B17 concordant BES mapping

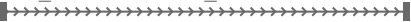

Gap Locations

Gap

Segmental Dups

Duplications of >1000 Bases of Non-RepeatMasked Sequence

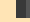

TMX3

NCBI RefSeq genes, curated subset - Annotation Release 2017-07-13

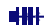

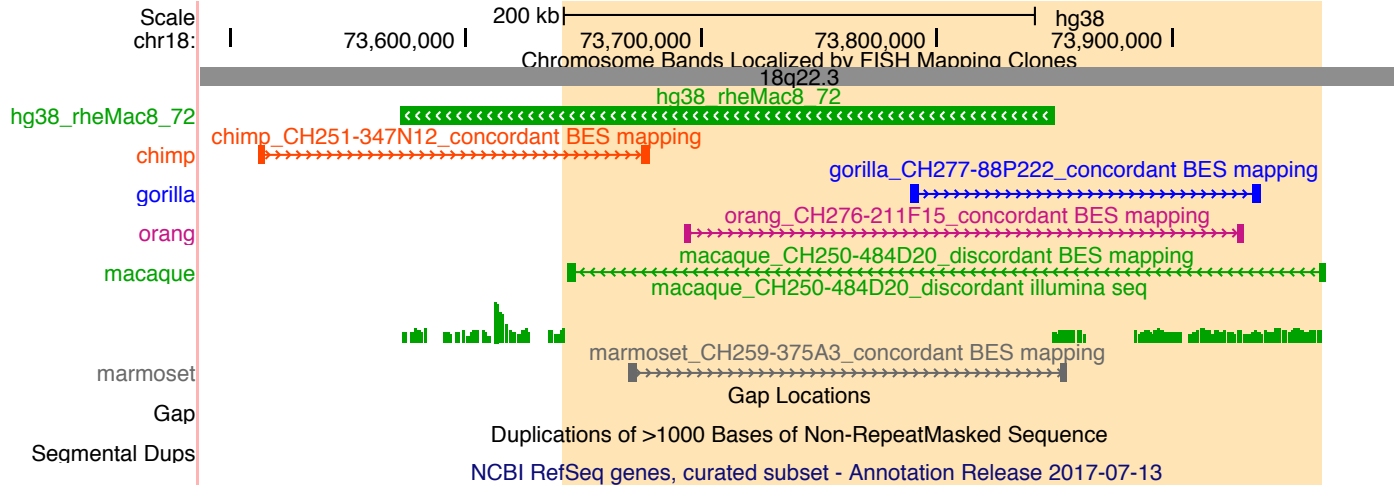

Scale chr18: | 5,650,000 | 5,700,000 | 5,750,000 | 5,800,000 | hg38 5,850,000 | 5,900,000 |

Chromosome Bands Localized by FISH Mapping Clones

18p11.31

hg38\_rheMac8\_103

hg38 rheMac8 103

chimp

chimp\_CH251-526L2\_concordant BES mapping  
chimp\_CH251-526L2\_concordant illumina seq

gorilla

gorilla\_CH277-383M2\_concordant BES mapping  
gorilla\_CH277-383M2\_concordant illumina seq

macaque

macaque\_CH250-401F1\_discordant BES mapping  
macaque\_CH250-401F1\_discordant illumina seq

marmoset

marmoset\_CH259-370O1\_concordant BES mapping  
marmoset\_CH259-370O1\_concordant illumina seq

Gap Locations

Gap

Duplications of >1000 Bases of Non-RepeatMasked Sequence

Segmental Dups

NCBI RefSeq genes, curated subset - Annotation Release 2017-07-13

EPB41L3  
MIR3976HG  
MIR3976  
TMEM200C

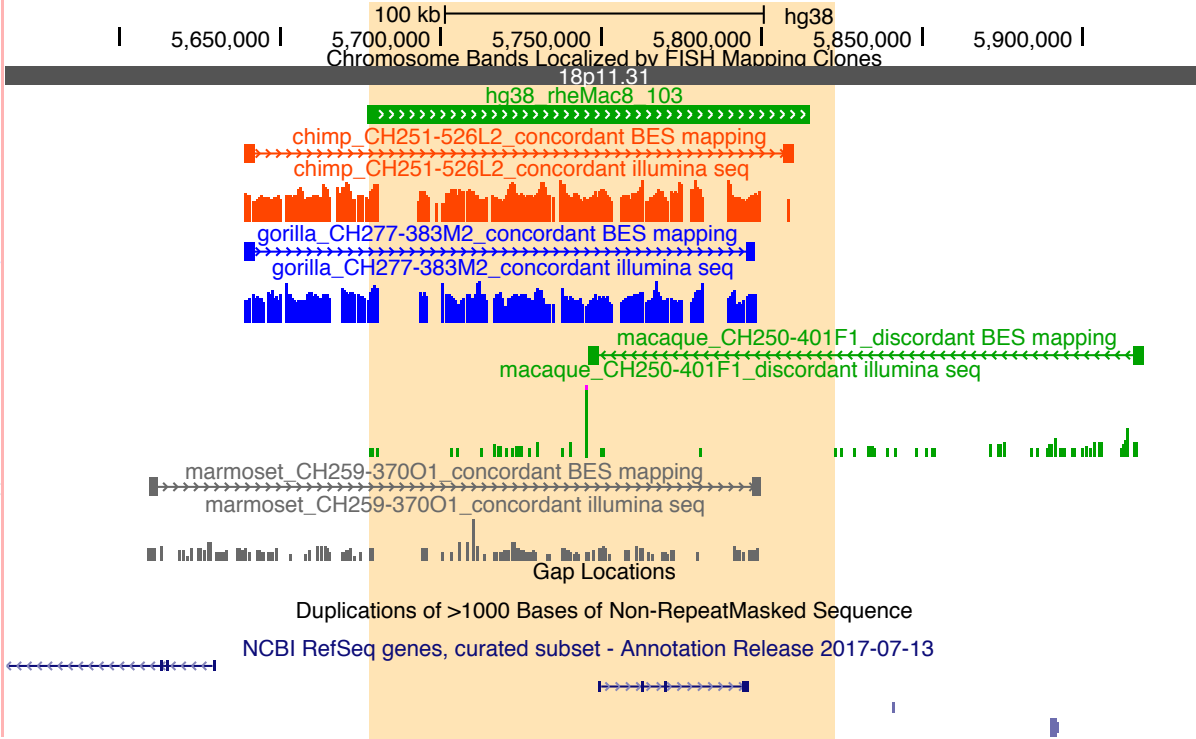



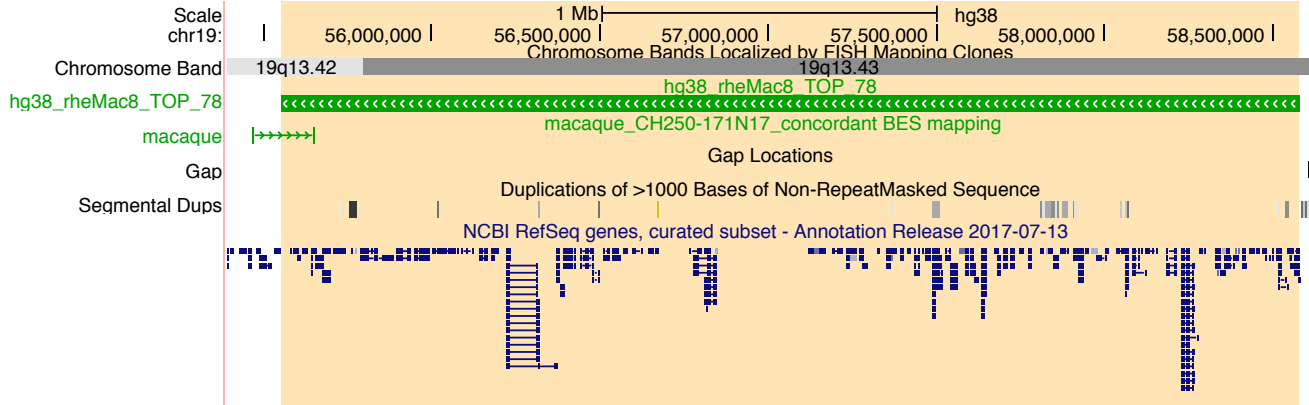

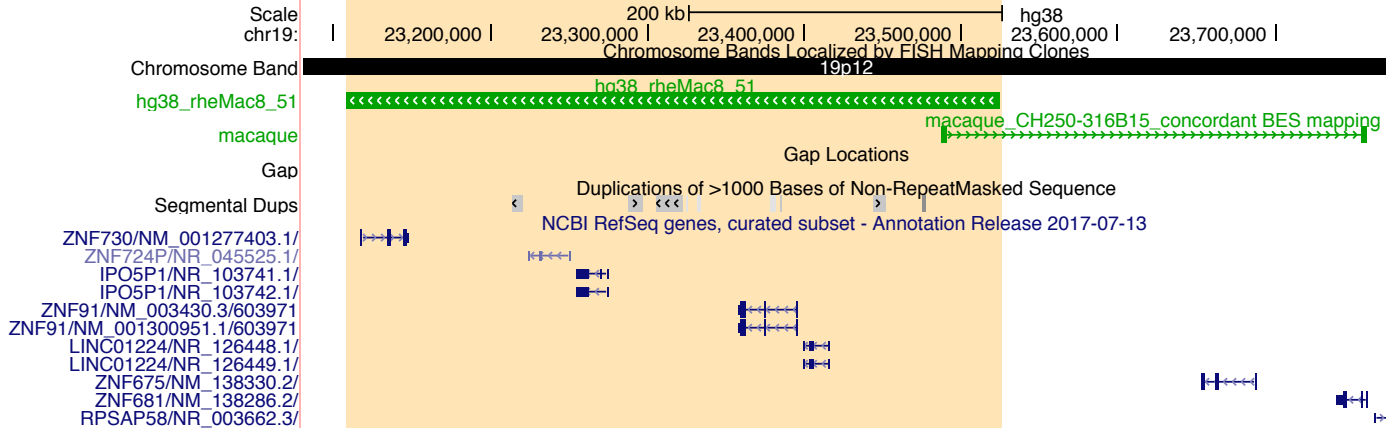



Scale chr22: 32,100,000 | 100 kb | 32,150,000 | 32,200,000 | hg38 32,250,000 |

Chromosome Band 22q12.3

hg38\_rheMac8\_118

macaque macaque\_CH250-530L10\_concordant BES mapping

Gap Locations

Gap Segmental Dups

Duplications of >1000 Bases of Non-RepeatMasked Sequence

NCBI RefSeq genes, curated subset - Annotation Release 2017-07-13

SLC5A1/NM\_000343.3/182380  
SLC5A1/NM\_001256314.1/182380  
AP1B1P1/NR\_040114.1/  
C22orf42/NM\_001010859.1/  
RFPL2/NM\_006605.3/605969  
RFPL2/NM\_001159546.1/605969  
RFPL2/NM\_001098527.2/605969  
RFPL2/NM\_001159545.1/605969  
SLC5A4/NM\_014227.2/

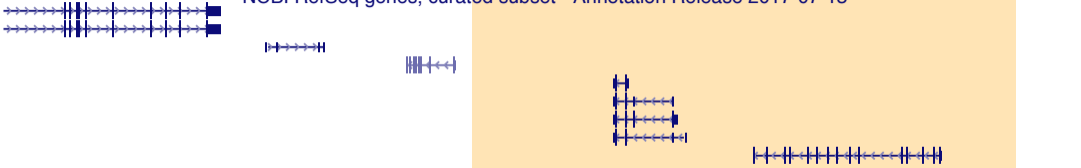

**Supplemental Fig. S4. Experimental validation by BES pair mapping and Illumina sequencing of BAC clones.**

UCSC Genome Browser views of all the inversion calls tested by Illumina sequencing and/or BES pair mapping. All BAC clones spanning the breakpoints of the predicted regions are shown as colored segments. Illumina sequenced discordant clones mapping at the breakpoints of the inversions appear as discontinuous. BES pair mapping of discordant clones supporting the inversion have end pairs that map abnormally far apart and have ends that are incorrectly oriented when mapped to the human reference genome sequence. Segmental duplications, sequence gaps and RefSeq curated genes are also shown for each event.

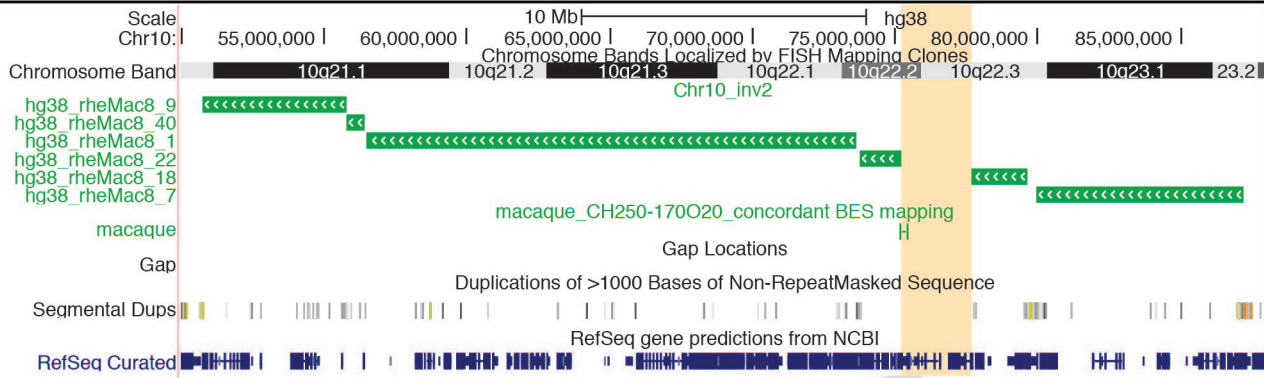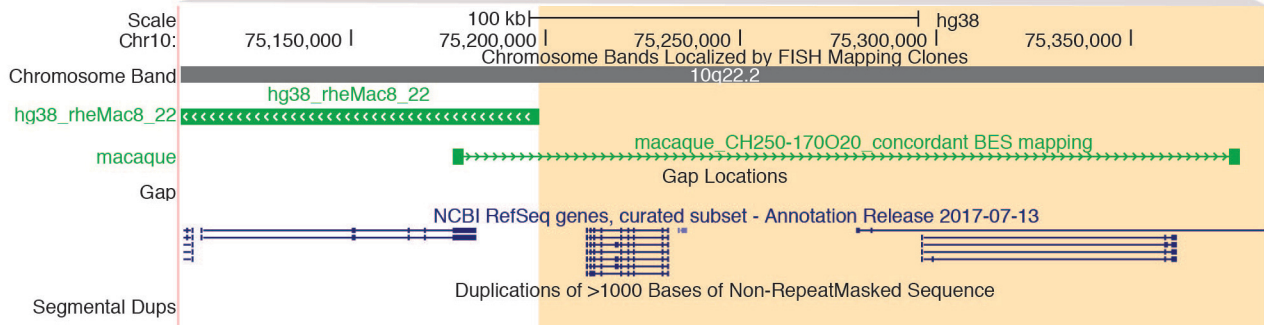

**Supplemental Fig. S5. Example of a misassembled region in the macaque genome.**

The cytogenetic inversion on human Chromosome 10 is 36.5 Mb in size and was detected as six separate smaller inversion calls. Nevertheless, the calls hg38\_rheMac8\_22 and hg38\_rheMac8\_18 are interrupted by an interval of 2.5 Mb of sequence in direct orientation. We investigated the orientation of this region by BES pair mapping. Clone CH250-170O20, spanning the proximal breakpoint of this region, demonstrates that it is in the same orientation of its flanking sequences and therefore represents an assembly error.
