# Supplementary material for: Inversion variants in human and primate genomes
Source: HighWire-hosted journal article supplement (doi:10.1101/gr.234831.118), 2018-05-18
Supplement: Supplemental_Tables_S1-S10.xlsx [file Supplemental_Tables_S1-S10.xlsx]

## Sheet: Table S1
Table S1. Sequence alignments between human and primate genome assemblies.
Inversion calls	Mapping (GRCh38/hg38)
hg38_rheMac8_125	Chr1:46948073-47050839
hg38_panTro5_2	Chr1:109669122-143585425
hg38_gorGor4_25	Chr1:145603984-146132863
hg38_panTro5_22	Chr1:147001966-148394677
hg38_ponAbe2_22	Chr1:147079442-147925603
hg38_rheMac8_TOP_51_46	Chr1:162833348-226673786
hg38_ponAbe2_55	Chr1:194242717-194399262
hg38_gorGor4_37	Chr1:205981864-206236906
hg38_rheMac8_94	Chr1:248121676-248295646
hg38_gorGor4_TOP_9_A_B	Chr10:27373003-79457365
hg38_ponAbe2_41	Chr10:45866801-46092941
hg38_rheMac8_23	Chr10:46108286-47557038
hg38_panTro5_27	Chr10:46370106-47476474
hg38_ponAbe2_26	Chr10:46870207-47457081
hg38_ponAbe2_3	Chr10:50259719-73659579
hg38_rheMac8_9	Chr10:50741163-55761676
hg38_rheMac8_40	Chr10:55814294-56430742
hg38_rheMac8_1	Chr10:56452681-73659440
hg38_rheMac8_22	Chr10:73741271-75198408
hg38_ponAbe2_11	Chr10:73741694-79500987
hg38_rheMac8_18	Chr10:77671255-79630553
hg38_rheMac8_7	Chr10:79919788-87216736
hg38_ponAbe2_37	Chr10:79923086-80209920
hg38_panTro5_40	Chr10:79923086-80209920
hg38_ponAbe2_10	Chr10:80258683-87222052
hg38_rheMac8_20	Chr10:80658598-82460816
hg38_ponAbe2_20	Chr10:87429953-88775900
hg38_rheMac8_16	Chr10:105534957-107833058
hg38_ponAbe2_2	Chr11:3602650-48489717
hg38_rheMac8_TOP_25	Chr11:3603695-48629640
hg38_rheMac8_TOP_49	Chr11:54648067-71566994
hg38_ponAbe2_7	Chr11:56749017-67702563
hg38_rheMac8_77	Chr11:61253334-61496892
hg38_ponAbe2_16	Chr11:68017243-71568887
hg38_panTro5_67	Chr12:9293186-9408602
hg38_panTro5_8	Chr12:20822597-33977318
hg38_gorGor4_18	Chr12:21190337-22093301
hg38_gorGor4_7	Chr12:22095546-34162542
hg38_panTro5_50	Chr12:33984909-34168436
hg38_gorGor4_65	Chr12:34277828-34408264
hg38_gorGor4_53	Chr12:37462963-37629314
hg38_gorGor4_1	Chr12:38206003-63930478
hg38_panTro5_4	Chr12:38229409-63930478
hg38_gorGor4_17	Chr12:63932519-64901919
hg38_panTro5_13	Chr12:63932581-67987723
hg38_rheMac8_58	Chr12:122453357-122805209
hg38_panTro5_53	Chr12:131356268-131521398
hg38_rheMac8_78	Chr12:131943088-132180809
hg38_rheMac8_TOP_102	Chr12:132743008-133241224
hg38_rheMac8_62	Chr13:104797611-105108126
hg38_ponAbe2_43	Chr13:113745900-113964579
hg38_gorGor4_45	Chr13:113751367-113945080
hg38_rheMac8_TOP_111	Chr13:113827516-114153778
hg38_gorGor4_TOP_27	Chr14:18891607-45300420
hg38_rheMac8_TOP_105	Chr14:19714886-20148024
hg38_rheMac8_53	Chr14:105574624-105956112
hg38_rheMac8_75	Chr14:106561425-106805521
hg38_gorGor4_19	Chr15:22420314-23123481
hg38_rheMac8_TOP_99	Chr15:22451211-23074397
hg38_ponAbe2_25	Chr15:22488116-23123138
hg38_rheMac8_52	Chr15:25957911-26356164
hg38_rheMac8_35	Chr15:26365476-27087847
panTro5_hg38_33	Chr15:28852754-29943347
hg38_panTro5_35	Chr15:29951467-30406229
hg38_rheMac8_27	Chr15:72795783-74063586
hg38_rheMac8_25	Chr16:2872845-4223242
hg38_rheMac8_TOP_85	Chr16:16571302-18436486
hg38_rheMac8_36	Chr16:28378167-29034255
hg38_ponAbe2_39	Chr16:28781227-29034270
hg38_rheMac8_119	Chr16:29640793-29748137
hg38_ponAbe2_27	Chr16:29640910-30210335
hg38_rheMac8_80	Chr16:31012037-31247558
hg38_panTro5_26	Chr16:34962662-36253738
hg38_rheMac8_TOP_116	Chr16:35090356-35367482
hg38_rheMac8_89	Chr16:65673523-65868382
hg38_ponAbe2_33	Chr16:70075634-70423758
hg38_ponAbe2_15	Chr16:70425596-74327699
hg38_rheMac8_97	Chr16:71626196-71795015
hg38_rheMac8_29	Chr16:71805540-72710600
hg38_rheMac8_21	Chr16:72710623-74321314
hg38_rheMac8_26	Chr16:76468474-77745478
hg38_rheMac8_98	Chr17:3064892-3217165
hg38_panTro5_10	Chr17:8027676-15524542
hg38_rheMac8_31	Chr17:15812020-16664213
hg38_panTro5_23	Chr17:17030337-18418935
hg38_panTro5_3	Chr17:18842525-49543141
hg38_ponAbe2_9	Chr17:37926957-45527618
hg38_rheMac8_50	Chr17:46565079-47013619
hg38_ponAbe2_32	Chr17:46573086-47015405
hg38_rheMac8_61	Chr17:47113100-47441195
hg38_rheMac8_3	Chr17:47478620-59429924
hg38_ponAbe2_6	Chr17:47985606-59586678
hg38_rheMac8_122	Chr17:60007755-60110885
hg38_gorGor4_TOP_30	Chr18:45438-14928065
hg38_panTro5_TOP_26	Chr18:112546-15275658
hg38_ponAbe2_TOP_29	Chr18:112546-14585009
hg38_rheMac8_TOP_67	Chr18:112546-9091468
hg38_rheMac8_103	Chr18:5677162-5815084
hg38_rheMac8_TOP_97	Chr18:13244741-13926507
hg38_rheMac8_24	Chr18:64235250-65639687
hg38_rheMac8_69	Chr18:68257880-68546524
hg38_rheMac8_33	Chr18:70885697-71666858
hg38_rheMac8_72	Chr18:73572681-73849640
hg38_rheMac8_56	Chr18:78238876-78606092
hg38_panTro5_52	Chr19:20286707-20455932
hg38_rheMac8_104	Chr19:20397347-20531341
hg38_gorGor4_63	Chr19:22386870-22521363
hg38_rheMac8_51	Chr19:23107814-23524774
hg38_panTro5_34	Chr19:36331795-36807829
hg38_panTro5_44	Chr19:36810564-37042414
hg38_panTro5_47	Chr19:37045085-37251831
hg38_rheMac8_TOP_78	Chr19:55552553-58578053
hg38_gorGor4_TOP_28	Chr2:94662837-111484366
hg38_ponAbe2_TOP_28	Chr2:94725912-113410325
hg38_ponAbe2_TOP_27	Chr2:113571714-132276181
hg38_rheMac8_TOP_50	Chr2:113672156-130394273
rheMac8_hg38_98	Chr2:137588644-137750208
hg38_rheMac8_60	Chr2:148935019-149268767
hg38_rheMac8_TOP_41	Chr20:67297-25738777
hg38_ponAbe2_TOP_31	Chr20:67297-5540425
hg38_panTro5_32	Chr20:29727359-30283254
hg38_rheMac8_64	Chr21:41831161-42139573
hg38_rheMac8_63	Chr22:20701254-21010362
hg38_rheMac8_118	Chr22:32162675-32270248
hg38_rheMac8_TOP_57	Chr3:11775-15122602
hg38_ponAbe2_TOP_30	Chr3:11778-12551308
hg38_ponAbe2_TOP_11_A	Chr3:15146425-75596563
hg38_rhemac8_70	Chr3:18884855-19168969
hg38_rhemac8_13	Chr3:19174699-22381724
hg38_rheMac8_TOP_30	Chr3:28684346-30222659
hg38_rheMac8_TOP_14	Chr3:30228770-34045405
hg38_rheMac8_TOP_21	Chr3:34049924-36611427
hg38_rheMac8_TOP_24	Chr3:36489743-75280684
hg38_ponAbe2_TOP_11_B	Chr3:90162433-129999065
hg38_rheMac8_5	Chr3:130212773-139493797
hg38_rheMac8_6	Chr3:139495680-148165519
hg38_rheMac8_41	Chr3:148167322-148755330
hg38_rheMac8_4	Chr3:159352874-170495363
hg38_rheMac8_2	Chr3:170497050-183173594
hg38_rheMac8_10	Chr3:183196786-186699833
hg38_rheMac8_17	Chr3:186699837-188752536
hg38_ponAbe2_13	Chr4:4182444-9339607
hg38_panTro5_6	Chr4:44809658-64439542
gorGor4_hg38_5	Chr4:51817234-68876438
hg38_ponAbe2_17	Chr4:51817234-54126955
hg38_rheMac8_TOP_72	Chr4:51819117-58873527
hg38_ponAbe2_5	Chr4:54143995-68708533
hg38_rheMac8_TOP_40	Chr4:58924614-85065524
hg38_panTro5_12	Chr4:64444532-68816007
hg38_panTro5_17	Chr4:69495873-72173616
hg38_panTro5_9	Chr4:72177073-85037105
hg38_rheMac8_59	Chr4:80834037-81178590
hg38_rheMac8_14	Chr4:104354664-107550508
hg38_rheMac8_43	Chr4:155179430-155723644
hg38_rheMac8_96	Chr4:178205683-178375658
hg38_rheMac8_84	Chr5:8767190-8984256
hg38_panTro5_16	Chr5:18553211-21275055
hg38_panTro5_1	Chr5:21292867-69629561
hg38_panTro5_5	Chr5:71363369-96585715
hg38_rheMac8_32	Chr5:99582578-100374690
hg38_ponAbe2_24	Chr5:99582578-100228462
hg38_panTro5_60	Chr5:99584037-99718090
hg38_panTro5_38	Chr5:99737827-100069297
hg38_gorGor4_56	Chr6:61111416-61270467
hg38_rheMac8_15	Chr6:103919901-106720071
hg38_rheMac8_37	Chr6:106723010-107373900
hg38_rheMac8_TOP_20_65	Chr6:107985526-158930335
hg38_panTro5_TOP_36	Chr7:798810-1030741
hg38_rheMac8_101	Chr7:2531298-2671789
hg38_rheMac8_39	Chr7:5166718-5797984
hg38_panTro5_29	Chr7:5997690-6705168
hg38_rheMac8_34	Chr7:5997690-6732324
hg38_ponAbe2_1	Chr7:7000214-76520747
hg38_rheMac8_TOP_22	Chr7:7015729-53862115
hg38_rheMac8_19	Chr7:13519980-15376281
hg38_rheMac8_11	Chr7:15380685-18852902
hg38_panTro5_25	Chr7:39545072-40839776
hg38_panTro5_15	Chr7:40840870-43961659
hg38_rheMac8_68	Chr7:52889416-53184622
hg38_panTro5_30	Chr7:53188941-53862225
hg38_rheMac8_TOP_63	Chr7:64281651-76551890
panTro5_hg38_31	Chr7:71693970-72868202
hg38_rheMac8_30	Chr7:72893718-73757732
hg38_panTro5_21	Chr7:73303000-74869950
hg38_rheMac8_49	Chr7:74420947-74869947
hg38_ponAbe2_4	Chr7:77066758-97873929
hg38_gorGor4_12	Chr7:77068178-80177198
hg38_rheMac8_TOP_58	Chr7:77122596-92102828
hg38_gorGor4_3	Chr7:80200340-102476575
hg38_rheMac8_45	Chr7:119289791-119798781
hg38_rheMac8_86	Chr7:125524041-125732150
hg38_rheMac8_57	Chr7:138697687-139063153
hg38_rheMac8_99	Chr7:143429334-143576499
hg38_rheMac8_8	Chr7:143818519-149042315
hg38_rheMac8_TOP_81	Chr7:53872256-56412238
hg38_rheMac8_100	Chr8:2343373-2486874
hg38_ponAbe2_14	Chr8:8242347-12685280
hg38_rheMac8_TOP_74	Chr8:8242362-12174746
hg38_gorGor4_8	Chr8:30041741-38207511
hg38_gorGor4_11	Chr8:38213296-42724996
hg38_rheMac8_TOP_82	Chr8:40821116-43284035
hg38_gorGor4_24	Chr8:42726243-43291717
hg38_gorGor4_70	Chr8:46590880-46696888
hg38_gorGor4_38	Chr8:46752126-47005339
hg38_rheMac8_TOP_100	Chr8:46758255-47331971
hg38_gorGor4_9	Chr8:47133472-54696382
hg38_rheMac8_12	Chr8:50265124-53564460
hg38_gorGor4_6	Chr8:54697645-69855519
hg38_gorGor4_4	Chr8:69860270-85827206
hg38_gorGor4_TOP_21	Chr9:49963-61718021
hg38_ponAbe2_TOP_21	Chr9:71293-67830571
hg38_rheMac8_107	Chr9:24424656-24553856
hg38_rheMac8_38	Chr9:38542001-39183739
hg38_rheMac8_TOP_27_28	Chr9:42952578-96949325
Net alignments identified between human (Build38, hg38), chimpanzee (panTro5), gorilla (gorGor4), orangutan (ponAbe2) and macaque (rheMac8) genomes, longer then 100 kb and containing less then 90% of repeats or segmental duplications.

## Sheet: Table S2
Table S2. List of the inversions between human and nonhuman primates.
Inversion	Mapping (GRCh38/hg38)	Size	panTro5 calls	Mapping (Pan_tro 3.0/panTro5)	gorGor4 calls	Mapping (gorGor4.1/gorGor4)	ponAbe2 calls	Mapping (WUGSC 2.0.2/ponAbe2)	rheMac8 calls	Mapping (BCM Mmul_8.0.1/rheMac8)
Chr1_inv1	Chr1:162833348-226673786	63840438							hg38_rheMac8_TOP_51_46	Chr1:142706793-204819210
Chr1_inv2	Chr1:109669122-143585425	33916303	hg38_panTro5_2	Chr1:112102713-126481863
Chr1_inv3	Chr1:147079442-147925603	846161	hg38_panTro5_22	Chr1:110597625-111480265			hg38_ponAbe2_22	Chr1:106323685-107228575
Chr1_inv4	Chr1:145603984-146132863	528879			hg38_gorGor4_25	Chr1:125324944-125882443
Chr1_inv5	Chr1:205981864-206236906	255042			hg38_gorGor4_37	Chr1:185872266-186128296
Chr1_inv6	Chr1:248121676-248295646	173970							hg38_rheMac8_94	Chr1:224865108-224984082
Chr1_inv7	Chr1:194242717-194399262	156545					hg38_ponAbe2_55	Chr1:55921763-56083404
Chr1_inv8	Chr1:46948073-47050839	102766							hg38_rheMac8_125	Chr1:46486805-46583663
Chr2_inv1	Chr2:94725912-111484366	16758454			hg38_gorGor4_TOP_28	Chr2A:69476-19510618	hg38_ponAbe2_TOP_28	Chr2a:3029456-19468266
Chr2_inv2	Chr2:113672156-130394273	16722117					hg38_ponAbe2_TOP_27	Chr2b:3929631-21119873	hg38_rheMac8_TOP_50	Chr12:1-17815528
Chr2_inv3	Chr2:148935019-149268767	333748							hg38_rheMac8_60	Chr12:35457391-35807091
Chr2_inv4	Chr2:137588644-137750208	161564							rheMac8_hg38_98	Chr12:23218063-23377745
Chr3_inv1	Chr3:15146425-75596563	60450138					hg38_ponAbe2_TOP_11_A	Chr3:70240937-132504765
Chr3_inv2	Chr3:130212773-186699833	56487060							hg38_rheMac8_2 hg38_rheMac8_4 hg38_rheMac8_5 hg38_rheMac8_6 hg38_rheMac8_10 hg38_rheMac8_41	Duplicated: Chr2:106187119-171754696; Chr2:94283421-192808614
Chr3_inv3	Chr3:90162433-129999065	39836632					hg38_ponAbe2_TOP_11_B	Chr3:2636313-39352326
Chr3_inv4	Chr3:36489743-75280684	38790941							hg38_rheMac8_TOP_24	Chr2:66644956-106186807
Chr3_inv5	Chr3:11775-15122602	15110827							hg38_rheMac8_TOP_57	Chr2:51275208-66697237
Chr3_inv6	Chr3:11778-12551308	12539530					hg38_ponAbe2_TOP_30	Chr3:57377451-70303248
Chr3_inv7	Chr3:30228770-34045405	3816635							hg38_rheMac8_TOP_14	Chr2:187013678-190894850
Chr3_inv8	Chr3:18884855-22381724	3496869							hg38_rhemac8_70 hg38_rhemac8_13	Chr2:175533285-179064865
Chr3_inv9	Chr3:34049924-36611427	2561503							hg38_rheMac8_TOP_21	Chr2:192950426-195474649
Chr3_inv10	Chr3:186699837-188752536	2052699							hg38_rheMac8_17	Chr2:190895735-192928880
Chr3_inv11	Chr3:28684346-30222659	1538313							hg38_rheMac8_TOP_30	Chr2:185450207-187013678
Chr4_inv1	Chr4:44809658-85037105	40227447	hg38_panTro5_6 hg38_panTro5_12 hg38_panTro5_17 hg38_panTro5_9	Chr4:45335762-87303438
Chr4_inv2	Chr4:51819117-85065524	33246407							hg38_rheMac8_TOP_72 hg38_rheMac8_TOP_40	Duplicated: Chr2:106187119-171754696; Chr2:94283421-192808614
Chr4_inv3	Chr4:51817234-68876438	17059204			gorGor4_hg38_5	Chr4:59548326-76999285
Chr4_inv4	Chr4:51817234-68708533	16891299					hg38_ponAbe2_17 hg38_ponAbe2_5	Chr4:50778281-68424566
Chr4_inv5	Chr4:4182444-9339607	5157163					hg38_ponAbe2_13	Chr4:4272121-9207714
Chr4_inv6	Chr4:104354664-107550508	3195844							hg38_rheMac8_14	Chr5:102841885-106019113
Chr4_inv7	Chr4:155179430-155723644	544214							hg38_rheMac8_43	Chr5:155056499-155659264
Chr4_inv8	Chr4:80834037-81178590	344553							hg38_rheMac8_59	Chr5:53197819-53530516
Chr4_inv9	Chr4:178205683-178375658	169975							hg38_rheMac8_96	Chr5:178655763-178808120
Chr5_inv1	Chr5:18553211-96585715	78032504	hg38_panTro5_16 hg38_panTro5_1 hg38_panTro5_5	Chr5:18861072-95915572
Chr5_inv2	Chr5:99582578-100374690	792112					hg38_ponAbe2_24	Duplicated: Chr5:99850886-100539303; Chr5_random:10370515-10560834; Chr5:38387779-38431058; Chr5:99839150-99850157; Chr5:100534451-100540220	hg38_rheMac8_32	Chr6:96420880-97363292
Chr5_inv3	Chr5:99584037-100069297	485260	hg38_panTro5_60 hg38_panTro5_38	Chr5:98848524-99343194
Chr5_inv4	Chr5:8767190-8984256	217066							hg38_rheMac8_84	Chr6:8802778-9009430
Chr6_inv1	Chr6:107985526-158930335	50944809							hg38_rheMac8_TOP_20_65	Chr4:107015330-159947970
Chr6_inv2	Chr6:103919901-107373900	3453999							hg38_rheMac8_15 hg38_rheMac8_37	Chr4:102804692-106425513
Chr6_inv3	Chr6:61111416-61270467	159051			hg38_gorGor4_56	Chr6:62999727-63180473
Chr7_inv1	Chr7:7000214-97873929	90873715					hg38_ponAbe2_1 hg38_ponAbe2_4	Duplicated: Chr7:11662142-78154292; Chr7:78154307-99534567; Chr1:145551116-145842228	hg38_rheMac8_TOP_22 hg38_rheMac8_TOP_63 hg38_rheMac8_TOP_58	Duplicated: Chr3:52396662-101790980; Chr3:101796951-117377698; Chr3:39937470-52087493; Chr3:117384983-123285530; Chr3:89338903-94865653
Chr7_inv2	Chr7:77068178-102476575	25408397			hg38_gorGor4_12 hg38_gorGor4_3	Chr7:75575859-101616310
Chr7_inv3	Chr7:13519980-18852902	5332922							hg38_rheMac8_19 hg38_rheMac8_11	Chr3:89338903-94865653
Chr7_inv4	Chr7:143818519-149042315	5223796							hg38_rheMac8_8	Chr3:170031517-175359020
Chr7_inv5	Chr7:39545072-43961659	4416587	hg38_panTro5_25 hg38_panTro5_15	Chr7:38969636-43380399
Chr7_inv6	Chr7:71693970-74869950	3175980	panTro5_hg38_31 hg38_panTro5_21	Chr7:74398163-77237644
Chr7_inv7	Chr7:53872256-56412238	2539982							hg38_rheMac8_TOP_81	Chr3:53194639-55796830
Chr7_inv8	Chr7:72893718-74869947	1976229							hg38_rheMac8_30 hg38_rheMac8_49	Duplicated: Chr3:42979459-43694198; Chr3:41808505-42803565; Chr3:41853454-42763983; Chr3:42899365-42962814
Chr7_inv9	Chr7:5997690-6732324	734634	hg38_panTro5_29	Split: Chr7:5133783-5167136; Chr7:5140797-5799717					hg38_rheMac8_34	Chr3:39937470-40753207
Chr7_inv10	Chr7:53188941-53862225	673284	hg38_panTro5_30	Chr7:52644532-53322318
Chr7_inv11	Chr7:5166718-5797984	631266							hg38_rheMac8_39	Chr3:39221609-39900137
Chr7_inv12	Chr7:119289791-119798781	508990							hg38_rheMac8_45	Chr3:145083122-145673264
Chr7_inv13	Chr7:138697687-139063153	365466							hg38_rheMac8_57	Chr3:165036708-165402460
Chr7_inv14	Chr7:52889416-53184622	295206							hg38_rheMac8_68	Chr3:52091183-52396553
Chr7_inv15	Chr7:798810-1030741	231931	hg38_panTro5_TOP_36	Chr7:34847-272981
Chr7_inv16	Chr7:125524041-125732150	208109							hg38_rheMac8_86	Chr3:151671577-151904001
Chr7_inv17	Chr7:143429334-143576499	147165							hg38_rheMac8_99	Chr3:175418052-175593881
Chr7_inv18	Chr7:2531298-2671789	140491							hg38_rheMac8_101	Chr3:36541684-36688564
Chr8_inv1	Chr8:30041741-85827206	55785465			hg38_gorGor4_8 hg38_gorGor4_11 hg38_gorGor4_24 hg38_gorGor4_70 hg38_gorGor4_38 hg38_gorGor4_9 hg38_gorGor4_6 hg38_gorGor4_4	Chr8:29312084-86342323
Chr8_inv2	Chr8:8242347-12174746	3932399					hg38_ponAbe2_14	Chr8:7805778-11807215	hg38_rheMac8_TOP_74	Chr8:7617340-11583723
Chr8_inv3	Chr8:50265124-53564460	3299336							hg38_rheMac8_12	Chr8:47886909-51496001
Chr8_inv4	Chr8:40821116-43284035	2462919							hg38_rheMac8_TOP_82	Chr8:41426532-43971500
Chr8_inv5	Chr8:46758255-47331971	573716							hg38_rheMac8_TOP_100	Chr8:43971603-44501809
Chr8_inv6	Chr8:2343373-2486874	143501							hg38_rheMac8_100	Chr8:2020067-2197097
Chr9_inv1	Chr9:49963-67830571	67780608			hg38_gorGor4_TOP_21	Chr9:198865-49989820	hg38_ponAbe2_TOP_21	Chr9:19077742-63041847
Chr9_inv2	Chr9:42952578-96949325	53996747							hg38_rheMac8_TOP_27_28	Chr15:84396932-110689979
Chr9_inv3	Chr9:38542001-39183739	641738							hg38_rheMac8_38	Duplicated: Chr15:110772077-111340160; Chr15:44620905-44865902; Chr15:111064141-111071154
Chr9_inv4	Chr9:24424656-24553856	129200							hg38_rheMac8_107	Chr15:59351920-59479710
Chr10_inv1	Chr10:27373003-79457365	52084362			hg38_gorGor4_TOP_9_A_B	Chr10:30237228-93468291
Chr10_inv2	Chr10:50741163-87216736	36475573					hg38_ponAbe2_3 hg38_ponAbe2_11 hg38_ponAbe2_37 hg38_ponAbe2_10	Chr10:47759716-85464080	hg38_rheMac8_9 hg38_rheMac8_40 hg38_rheMac8_1 hg38_rheMac8_22 hg38_rheMac8_18 hg38_rheMac8_7	Chr9:44430222-82155288
Chr10_inv3	Chr10:105534957-107833058	2298101							hg38_rheMac8_16	Chr9:101342170-103683347
Chr10_inv4	Chr10:80658598-82460816	1802218							hg38_rheMac8_20	Chr9:50108281-51965231
Chr10_inv5	Chr10:87429953-88775900	1345947					hg38_ponAbe2_20	Chr10:85605511-87045866
Chr10_inv6	Chr10:46870207-47457081	586874	hg38_panTro5_27	Chr10:47902790-48493855			hg38_ponAbe2_26	Chr10:45084001-45693111	hg38_rheMac8_23	Chr9:41682991-42275830
Chr10_inv7	Chr10:79923086-80209920	286834	hg38_panTro5_40	Chr10:80824424-81062630
Chr10_inv8	Chr10:45866801-46092941	226140					hg38_ponAbe2_41	Duplicated: Chr10:47362469-47484371; ChrUn:13848027-13879418; Chr10:47514827-47656503
Chr11_inv1	Chr11:3603695-71568887	67965192					hg38_ponAbe2_2 hg38_ponAbe2_7 hg38_ponAbe2_16	Chr11:4611265-67139335	hg38_rheMac8_TOP_25 hg38_rheMac8_TOP_49	Duplicated: Chr14:17512768-63825673; Chr14:3153209-17580325; Chr14:81335156-82546512; Chr14:12797602-13062547
Chr11_inv2	Chr11:61253334-61496892	243558							hg38_rheMac8_77	Chr14:12820748-13062547
Chr12_inv1	Chr12:20822597-67987723	47165126	hg38_panTro5_8 hg38_panTro5_50 hg38_panTro5_4 hg38_panTro5_13	Chr12:21564440-70083052
Chr12_inv2	Chr12:21190337-64901919	43711582			hg38_gorGor4_18 hg38_gorGor4_7 hg38_gorGor4_65 hg38_gorGor4_53 hg38_gorGor4_1 hg38_gorGor4_17	Chr12:21083220-63910906
Chr12_inv3	Chr12:132743008-133241224	498216							hg38_rheMac8_TOP_102	Chr11:133190265-133663169
Chr12_inv4	Chr12:122453357-122805209	351852							hg38_rheMac8_58	Chr11:50354128-50727796
Chr12_inv5	Chr12:131943088-132180809	237721							hg38_rheMac8_78	Chr11:132387112-132638337
Chr12_inv6	Chr12:131356268-131521398	165130	hg38_panTro5_53	Chr12:135142402-135310190
Chr12_inv7	Chr12:9293186-9408602	115416	hg38_panTro5_67	Chr12:9836187-9959767
Chr13_inv1	Chr13:113827516-114153778	326262							hg38_rheMac8_TOP_111	Chr17:95243380-95534194
Chr13_inv2	Chr13:104797611-105108126	310515							hg38_rheMac8_62	Chr17:86530532-86845034
Chr13_inv3	Chr13:113745900-113964579	218679					hg38_ponAbe2_43	Chr13:116363316-116590354
Chr13_inv4	Chr13:113751367-113945080	193713			hg38_gorGor4_45	Chr13:96577928-96773504
Chr14_inv1	Chr14:18891607-45300420	26408813			hg38_gorGor4_TOP_27	Chr14:4-26089325
Chr14_inv2	Chr14:19714886-20148024	433138							hg38_rheMac8_TOP_105	Chr7:80923942-81341891
Chr14_inv3	Chr14:105574624-105956112	381488							hg38_rheMac8_53	Chr7:168508338-168908210
Chr14_inv4	Chr14:106561425-106805521	244096							hg38_rheMac8_75	Duplicated: Chr7:168152807-168325491; Chr7:167947066-167970860; Chr7:169311457-169316242; Chr7:168923352-169194252; Chr7:169291900-169299419; Chr7:169295856-169314623
Chr15_inv1	Chr15:28852754-30406229	1553475	panTro5_hg38_33 hg38_panTro5_35	Split: Chr15:9297660-10934318; Chr15:10963749-12639136
Chr15_inv2	Chr15:72795783-74063586	1267803							hg38_rheMac8_27	Chr7:49805197-51076570
Chr15_inv3	Chr15:25957911-27087847	1129936							hg38_rheMac8_52 hg38_rheMac8_35	Chr7:2825381-3964953
Chr15_inv4	Chr15:22420314-23123481	703167			hg38_gorGor4_19	Chr15:1622849-2131162	hg38_ponAbe2_25	Chr15:18790327-19520001	hg38_rheMac8_TOP_99	Duplicated: Chr7:29866-512647; Chr7:5236650-5454362; Chr17:73829452-73904171; Chr10:18093585-18116787; Chr2:187211260-187237157
Chr16_inv1	Chr16:70075634-74327699	4252065					hg38_ponAbe2_33 hg38_ponAbe2_15	Chr16:57422470-61904292	hg38_rheMac8_21 hg38_rheMac8_29 hg38_rheMac8_97	Duplicated: Chr20:54390685-55899747; Chr20:56083936-56973995; Chr20:56978743-58806943; Chr20:55900423-56080001
Chr16_inv2	Chr16:16571302-18436486	1865184							hg38_rheMac8_TOP_85	Chr20:16077754-17939646
Chr16_inv3	Chr16:28781227-30210335	1429107					hg38_ponAbe2_39 hg38_ponAbe2_27	Duplicated: Chr16:28059963-28793604; Chr16:27596578-27850343; Chr16_random:4187801-4301232; Chr16:28771918-28793604; Chr16:75660194-75850831
Chr16_inv4	Chr16:2872845-4223242	1350397							hg38_rheMac8_25	Chr20:2717284-4068037
Chr16_inv5	Chr16:34962662-36253738	1291076	hg38_panTro5_26	Chr16:35097226-36880494
Chr16_inv6	Chr16:76468474-77745478	1277004							hg38_rheMac8_26	Chr20:60829945-62247019
Chr16_inv7	Chr16:28378167-29034255	656088							hg38_rheMac8_36	Chr20:27148136-27771082
Chr16_inv8	Chr16:29640910-30210335	569425					hg38_ponAbe2_27	Duplicated: Chr16:28059963-28585038; Chr16_random:4187801-4301232
Chr16_inv9	Chr16:35090356-35367482	277126							hg38_rheMac8_TOP_116	Chr20:30059498-30412956
Chr16_inv10	Chr16:31012037-31247558	235521							hg38_rheMac8_80	Chr20:28834867-29082104
Chr16_inv11	Chr16:65673523-65868382	194859							hg38_rheMac8_89	Chr20:49913342-50109011
Chr16_inv12	Chr16:29640793-29748137	107344							hg38_rheMac8_119	Chr20:27805682-27925755
Chr17_inv1	Chr17:8027676-49543141	41515465	hg38_panTro5_10 hg38_panTro5_23 hg38_panTro5_3	Chr17:8313795-48658323
Chr17_inv2	Chr17:47478620-59586678	12108058					hg38_ponAbe2_6	Duplicated: Chr17:32958040-42662237; Chr17_random:2094561-4677917; Chr17_random:11329498-14295548	hg38_rheMac8_3	Chr16:30221884-43981963
Chr17_inv3	Chr17:37926957-45527618	7600661					hg38_ponAbe2_9	Chr17:43897486-51006983
Chr17_inv4	Chr17:15812020-16664213	852193							hg38_rheMac8_31	Chr16:15983662-16910214
Chr17_inv5	Chr17:46573086-47013619	440533					hg38_ponAbe2_32	Chr17:42739117-43187178	hg38_rheMac8_50	Chr16:51649571-52068908
Chr17_inv6	Chr17:47113100-47441195	328095							hg38_rheMac8_61	Chr16:40799498-41127882
Chr17_inv7	Chr17:3064892-3217165	152273							hg38_rheMac8_98	Chr16:3038089-3149535
Chr17_inv8	Chr17:60007755-60110885	103130							hg38_rheMac8_122	Duplicated: Chr16:30118487-30175859; Chr16:53542200-53623549
Chr18_inv1	Chr18:112546-15275658	15163112	hg38_panTro5_TOP_26	Chr18:3083429-17964094	hg38_gorGor4_TOP_30	Chr18:1-14966178	hg38_ponAbe2_TOP_29	Chr18:17364364-32635341	hg38_rheMac8_TOP_67	Chr18:1802-9407666
Chr18_inv2	Chr18:64235250-65639687	1404437							hg38_rheMac8_24	Chr18:53884117-55307882
Chr18_inv3	Chr18:70885697-71666858	781161							hg38_rheMac8_33	Chr18:60935537-61725089
Chr18_inv4	Chr18:13244741-13926507	681766							hg38_rheMac8_TOP_97	Chr18:518946-1111132
Chr18_inv5	Chr18:78238876-78606092	367216							hg38_rheMac8_56	Chr18:68331855-68675824
Chr18_inv6	Chr18:68257880-68546524	288644							hg38_rheMac8_69	Chr18:58197488-58502484
Chr18_inv7	Chr18:73572681-73849640	276959							hg38_rheMac8_72	Chr18:63728874-64007644
Chr18_inv8	Chr18:5677162-5815084	137922							hg38_rheMac8_103	Chr18:3762578-3885063
Chr19_inv1	Chr19:55552553-58578053	3025500							hg38_rheMac8_TOP_78	Chr19:50762505-53633884
Chr19_inv2	Chr19:36331795-37251831	920036	hg38_panTro5_34 hg38_panTro5_44 hg38_panTro5_47	Chr19:38245665-39178852
Chr19_inv3	Chr19:23107814-23524774	416960							hg38_rheMac8_51	Chr19:22338196-22887890
Chr19_inv4	Chr19:20286707-20455932	169225	hg38_panTro5_52	Chr19:21191773-21515075
Chr19_inv5	Chr19:22386870-22521363	134493			hg38_gorGor4_63	Duplicated: Chr19:22324897-22402511; Chr19:22467832-22594111; Chr3:52693975-52702558; Chr7:63888516-63933016
Chr19_inv6	Chr19:20397347-20531341	133994							hg38_rheMac8_104	Duplicated: Chr19:20583682-20653880; Chr19:20185772-20325481; Chr19:20438512-20490085; Chr19:19949342-20169458; Chr19:20485567-20579881
Chr20_inv1	Chr20:67297-25738777	25671480							hg38_rheMac8_TOP_41	Chr10:32816627-58823216
Chr20_inv2	Chr20:67297-5540425	5473128					hg38_ponAbe2_TOP_31	Chr20:22692340-28380005
Chr20_inv3	Chr20:29727359-30283254	555895	hg38_panTro5_32	Chr20:26115880-26705521
Chr21_inv1	Chr21:41831161-42139573	308412							hg38_rheMac8_64	Chr3:4519178-4833256
Chr22_inv1	Chr22:20701254-21010362	309108							hg38_rheMac8_63	Chr10:62614149-62948498
Chr22_inv2	Chr22:32162675-32270248	107573							hg38_rheMac8_118	Chr10:74068727-74159572
Regions found to be inverted in one or multiple primate species obtained after merging separate flanking alignments are shown.

## Sheet: Table S3
Table S3. Inversions validations.
Inversion	Mapping (GRCh38/hg38)	Size	panTro5 calls	Chimpanzee Validation	gorGor4 calls	Gorilla Validation	ponAbe2 calls	Orangutan Validation	rheMac8 calls	Macaque Validation	Marmoset Validation (Outgroup)	In the ancestor of	Segmental Duplications at BPs	Notes
Chr1_inv1	Chr1:162833348-226673786	63840438		dir Ventura et al., 2011		dir Ventura et al., 2011		dir Ventura et al., 2011	hg38_rheMac8_TOP_51_46	inv Ventura et al., 2007	dir Ventura et al., 2007	OWM	yes
Chr1_inv2	Chr1:109669122-143585425	33916303	hg38_panTro5_2	false: dir by FISH									yes
Chr1_inv3	Chr1:147079442-147925603	846161	hg38_panTro5_22	inv by FISH		dir by FISH	hg38_ponAbe2_22	inv by FISH		inv by FISH		HSA-PTR-GGO; ILS or recurrent inv in PTR	yes	human build38 ref wrong orientation or minor allele
Chr1_inv4	Chr1:145603984-146132863	528879			hg38_gorGor4_25	ND							yes
Chr1_inv5	Chr1:205981864-206236906	255042			hg38_gorGor4_37	ND							yes
Chr1_inv6	Chr1:248121676-248295646	173970		dir by BES pair mapping		dir by BES pair mapping		dir by BES pair mapping	hg38_rheMac8_94	inv by BES pair mapping inv by BAC illumina sequencing	ND	ND	yes
Chr1_inv7	Chr1:194242717-194399262	156545		dir by BES pair mapping dir by BAC illumina sequencing		dir by BES pair mapping dir by BAC illumina sequencing	hg38_ponAbe2_55	inv by BES pair mapping inv by BAC illumina sequencing		inv by BES pair mapping inv by BAC illumina sequencing		HSA-PTR-GGO	no
Chr1_inv8	Chr1:46948073-47050839	102766		dir by BES pair mapping		dir by BES pair mapping		ND	hg38_rheMac8_125	inv by BES pair mapping	dir by BES pair mapping	ND	yes
Chr2_inv1	Chr2:94725912-111484366	16758454		dir Ventura et al., 2011	hg38_gorGor4_TOP_28	inv Ventura et al., 2011	hg38_ponAbe2_TOP_28	inv Ventura et al., 2011		inv Ventura et al., 2007		HSA-PTR	yes
Chr2_inv2	Chr2:113672156-130394273	16722117		dir Ventura et al., 2011		dir Ventura et al., 2011	hg38_ponAbe2_TOP_27	inv Ventura et al., 2011	hg38_rheMac8_TOP_50	inv Ventura et al., 2007		HSA-PTR-GGO	yes
Chr2_inv3	Chr2:148935019-149268767	333748							hg38_rheMac8_60	false: dir by BES pair mapping			no
Chr2_inv4	Chr2:137588644-137750208	161564		dir by BES pair mapping dir by BAC illumina sequencing		dir by BES pair mapping		dir by BES pair mapping	rheMac8_hg38_98	inv by BES pair mapping inv by BAC illumina sequencing	dir by BES pair mapping	MMU	no
Chr3_inv1	Chr3:15146425-75596563	60450138		dir Ventura et al., 2011		dir Ventura et al., 2011	hg38_ponAbe2_TOP_11_A	inv Ventura et al., 2011		dir Ventura et al., 2007		HSA-PTR-GGO	yes
Chr3_inv2	Chr3:130212773-186699833	56487060		dir Ventura et al., 2011		dir Ventura et al., 2011		dir Ventura et al., 2011	hg38_rheMac8_2 hg38_rheMac8_4 hg38_rheMac8_5 hg38_rheMac8_6 hg38_rheMac8_10 hg38_rheMac8_41	inv Ventura et al., 2007	dir Ventura et al., 2011	MMU	yes
Chr3_inv3	Chr3:90162433-129999065	39836632		dir Ventura et al., 2011		dir Ventura et al., 2011	hg38_ponAbe2_TOP_11_B	inv Ventura et al., 2011		dir Ventura et al., 2007		PAB	yes
Chr3_inv4	Chr3:36489743-75280684	38790941		dir Ventura et al., 2011		dir Ventura et al., 2011		dir Ventura et al., 2011	hg38_rheMac8_TOP_24	inv Ventura et al., 2007		MMU	yes
Chr3_inv5	Chr3:11775-15122602	15110827		dir Ventura et al., 2011		dir Ventura et al., 2011		dir Ventura et al., 2011	hg38_rheMac8_TOP_57	inv Ventura et al., 2007		MMU	yes
Chr3_inv6	Chr3:11778-12551308	12539530		dir Ventura et al., 2011		dir Ventura et al., 2011	hg38_ponAbe2_TOP_30	inv Ventura et al., 2011		dir Ventura et al., 2007		HSA-PTR-GGO	yes
Chr3_inv7	Chr3:30228770-34045405	3816635							hg38_rheMac8_TOP_14	false: dir by BES pair mapping			no
Chr3_inv8	Chr3:18884855-22381724	3496869							hg38_rhemac8_70 hg38_rhemac8_13	false: dir by BES pair mapping			no
Chr3_inv9	Chr3:34049924-36611427	2561503							hg38_rheMac8_TOP_21	false: dir by BES pair mapping			no
Chr3_inv10	Chr3:186699837-188752536	2052699							hg38_rheMac8_17	false: dir by FISH			no
Chr3_inv11	Chr3:28684346-30222659	1538313							hg38_rheMac8_TOP_30	false: dir by BES pair mapping			no
Chr4_inv1	Chr4:44809658-85037105	40227447	hg38_panTro5_6 hg38_panTro5_12 hg38_panTro5_17 hg38_panTro5_9	inv Ventura et al., 2011		dir Ventura et al., 2011		dir Ventura et al., 2011		dir Ventura et al., 2007	dir Ventura et al., 2007	PTR	no
Chr4_inv2	Chr4:51819117-85065524	33246407		dir Ventura et al., 2011		dir Ventura et al., 2011		dir Ventura et al., 2011	hg38_rheMac8_TOP_72 hg38_rheMac8_TOP_40	inv Ventura et al., 2007	dir Ventura et al., 2007	MMU	yes
Chr4_inv3	Chr4:51817234-68876438	17059204		dir Ventura et al., 2011	gorGor4_hg38_5	inv Ventura et al., 2011		dir Ventura et al., 2011		dir Ventura et al., 2007	dir Ventura et al., 2007	GGO	yes
Chr4_inv4	Chr4:51817234-68708533	16891299		dir Ventura et al., 2011		dir Ventura et al., 2011	hg38_ponAbe2_17 hg38_ponAbe2_5	inv Ventura et al., 2011		dir Ventura et al., 2007	dir Ventura et al., 2007	PPY	yes
Chr4_inv5	Chr4:4182444-9339607	5157163		dir by FISH		inv by FISH	hg38_ponAbe2_13	inv by FISH		inv by FISH		HSA-PTR	yes	Polymorphic in human (Giglio et al., 2002)
Chr4_inv6	Chr4:104354664-107550508	3195844							hg38_rheMac8_14	false: dir by BES pair mapping			no
Chr4_inv7	Chr4:155179430-155723644	544214							hg38_rheMac8_43	false: dir by BES pair mapping false: dir by BAC illumina sequencing			no
Chr4_inv8	Chr4:80834037-81178590	344553							hg38_rheMac8_59	false: dir by BES pair mapping			no
Chr4_inv9	Chr4:178205683-178375658	169975		dir by BES pair mapping dir by BAC illumina sequencing		dir by BES pair mapping dir by BAC illumina sequencing		dir by BES pair mapping dir by BAC illumina sequencing	hg38_rheMac8_96	inv by BES pair mapping inv by BAC illumina sequencing	inv by BES pair mapping inv by BAC illumina sequencing	Great apes	no
Chr5_inv1	Chr5:18553211-96585715	78032504	hg38_panTro5_16 hg38_panTro5_1 hg38_panTro5_5	inv Ventura et al., 2011		dir Ventura et al., 2011		dir Ventura et al., 2011		dir Ventura et al., 2007		PTR	no
Chr5_inv2	Chr5:99582578-100374690	792112		dir by BES pair mapping dir by BAC illumina sequencing dir/inv by FISH		inv by BES pair mapping inv by BAC illumina sequencing dir/inv by FISH	hg38_ponAbe2_24	inv by BES pair mapping inv by BAC illumina sequencing inv by FISH	hg38_rheMac8_32	inv by BES pair mapping inv by BAC illumina sequencing dir/inv by FISH		ND	yes	smaller region (overlapping with Chr5_inv3) in GGO because of a deletion
Chr5_inv3	Chr5:99584037-100069297	485260	hg38_panTro5_60 hg38_panTro5_38	inv by BES pair mapping inv by BAC illumina sequencing		ND		ND		ND		ND	yes
Chr5_inv4	Chr5:8767190-8984256	217066		dir by BES pair mapping		dir by BES pair mapping		dir by BES pair mapping	hg38_rheMac8_84	inv by BES pair mapping inv by BAC illumina sequencing	dir by BES pair mapping	MMU	no
Chr6_inv1	Chr6:107985526-158930335	50944809		dir Ventura et al., 2007		dir Ventura et al., 2007		dir Ventura et al., 2007	hg38_rheMac8_TOP_20_65	inv Ventura et al., 2007	dir Ventura et al., 2007	OWM	no
Chr6_inv2	Chr6:103919901-107373900	3453999							hg38_rheMac8_15 hg38_rheMac8_37	false: dir by FISH			no
Chr6_inv3	Chr6:61111416-61270467	159051			hg38_gorGor4_56	false: dir by BES pair mapping							yes
Chr7_inv1	Chr7:7000214-97873929	90873715		dir Ventura et al., 2011		dir Ventura et al., 2011	hg38_ponAbe2_1 hg38_ponAbe2_4	inv Ventura et al., 2011	hg38_rheMac8_TOP_22 hg38_rheMac8_TOP_63 hg38_rheMac8_TOP_58	inv Ventura et al., 2007		HSA-PTR-GGO	yes
Chr7_inv2	Chr7:77068178-102476575	25408397		dir Ventura et al., 2011	hg38_gorGor4_12 hg38_gorGor4_3	inv Ventura et al., 2011		dir Ventura et al., 2011		dir Ventura et al., 2007		GGO	yes
Chr7_inv3	Chr7:13519980-18852902	5332922							hg38_rheMac8_19 hg38_rheMac8_11	false: dir by BES pair mapping false: dir by FISH			no
Chr7_inv4	Chr7:143818519-149042315	5223796							hg38_rheMac8_8	false: dir by FISH			yes
Chr7_inv5	Chr7:39545072-43961659	4416587	hg38_panTro5_25 hg38_panTro5_15	inv Feuk et al., 2005		inv Feuk et al., 2005		ND		ND		HSA	yes
Chr7_inv6	Chr7:71693970-74869950	3175980	panTro5_hg38_31 hg38_panTro5_21	inv by BES pair mapping inv by BAC illumina sequencing inv by FISH		dir by FISH		dir by FISH		dir by BES pair mapping dir by FISH		PTR	yes
Chr7_inv7	Chr7:53872256-56412238	2539982							hg38_rheMac8_TOP_81	false: dir by FISH			yes
Chr7_inv8	Chr7:72893718-74869947	1976229		dir by FISH		dir by FISH		dir by FISH	hg38_rheMac8_30 hg38_rheMac8_49	inv by FISH		Great apes	yes	Polymorphic in human (Sanders et al., 2016)
Chr7_inv9	Chr7:5997690-6732324	734634	hg38_panTro5_29	inv Feuk et al., 2005		inv Feuk et al., 2005		ND	hg38_rheMac8_34	ND		HSA	yes	Polymorphic in human (Feuk et al., 2005; Sanders et al., 2016)
Chr7_inv10	Chr7:53188941-53862225	673284	hg38_panTro5_30	inv by BES pair mapping inv by BAC illumina sequencing inv by FISH inv Feuk et al., 2005		inv by BES pair mapping inv by BAC illumina sequencing inv by FISH inv Feuk et al., 2005		inv by BES pair mapping inv by FISH		inv by BES pair mapping inv by BAC illumina sequencing inv by FISH		HSA	yes
Chr7_inv11	Chr7:5166718-5797984	631266							hg38_rheMac8_39	false: dir by FISH			yes
Chr7_inv12	Chr7:119289791-119798781	508990		dir by BES pair mapping dir by BAC illumina sequencing		dir by BES pair mapping dir by BAC illumina sequencing		dir by BES pair mapping dir by BAC illumina sequencing	hg38_rheMac8_45	inv by BES pair mapping inv by BAC illumina sequencing	dir by BES pair mapping dir by BAC illumina sequencing	MMU	no
Chr7_inv13	Chr7:138697687-139063153	365466							hg38_rheMac8_57	false: dir by BES pair mapping			no
Chr7_inv14	Chr7:52889416-53184622	295206							hg38_rheMac8_68	false: dir by BES pair mapping			yes
Chr7_inv15	Chr7:798810-1030741	231931	hg38_panTro5_TOP_36	false: dir by BES pair mapping									no
Chr7_inv16	Chr7:125524041-125732150	208109		dir by BES pair mapping		dir by BES pair mapping		dir by BES pair mapping	hg38_rheMac8_86	inv by BES pair mapping	dir by BES pair mapping	MMU	yes
Chr7_inv17	Chr7:143429334-143576499	147165							hg38_rheMac8_99	ND			yes
Chr7_inv18	Chr7:2531298-2671789	140491		dir by BES pair mapping		dir by BES pair mapping		inv by BES pair mapping inv by BAC illumina sequencing	hg38_rheMac8_101	inv by BES pair mapping inv by BAC illumina sequencing		HSA-PTR-GGO	yes
Chr8_inv1	Chr8:30041741-85827206	55785465		dir Ventura et al., 2011	hg38_gorGor4_8 hg38_gorGor4_11 hg38_gorGor4_24 hg38_gorGor4_70 hg38_gorGor4_38 hg38_gorGor4_9 hg38_gorGor4_6 hg38_gorGor4_4	inv Ventura et al., 2011		dir Ventura et al., 2011		dir Ventura et al., 2007		GGO	yes
Chr8_inv2	Chr8:8242347-12174746	3932399		dir Antonacci et al., 2009		inv Antonacci et al., 2009	hg38_ponAbe2_14	inv Antonacci et al., 2009	hg38_rheMac8_TOP_74	inv Antonacci et al., 2009		HSA-PTR	yes	Polymorphic in human (Giglio et al., 2001; Antonacci et al., 2009; Sanders et al., 2016)
Chr8_inv3	Chr8:50265124-53564460	3299336							hg38_rheMac8_12	false: dir by BES pair mapping false: dir by FISH			no
Chr8_inv4	Chr8:40821116-43284035	2462919							hg38_rheMac8_TOP_82	false: dir by FISH			yes
Chr8_inv5	Chr8:46758255-47331971	573716							hg38_rheMac8_TOP_100	false: dir by BES pair mapping			yes
Chr8_inv6	Chr8:2343373-2486874	143501							hg38_rheMac8_100	ND			yes
Chr9_inv1	Chr9:49963-67830571	67780608		dir Ventura et al., 2011	hg38_gorGor4_TOP_21	inv Ventura et al., 2011	hg38_ponAbe2_TOP_21	inv Ventura et al., 2011		inv Ventura et al., 2007		HSA-PTR	yes
Chr9_inv2	Chr9:42952578-96949325	53996747		dir Ventura et al., 2011		dir Ventura et al., 2011		dir Ventura et al., 2011	hg38_rheMac8_TOP_27_28	inv Ventura et al., 2007		ND	yes
Chr9_inv3	Chr9:38542001-39183739	641738							hg38_rheMac8_38	ND			yes
Chr9_inv4	Chr9:24424656-24553856	129200		dir by BES pair mapping dir by BAC illumina sequencing		dir by BES pair mapping dir by BAC illumina sequencing		dir by BES pair mapping dir by BAC illumina sequencing	hg38_rheMac8_107	inv by BES pair mapping inv by BAC illumina sequencing	dir by BES pair mapping	MMU	no
Chr10_inv1	Chr10:27373003-79457365	52084362		dir Ventura et al., 2011	hg38_gorGor4_TOP_9_A_B	inv Ventura et al., 2011		dir Ventura et al., 2011		dir Ventura et al., 2007		GGO	yes
Chr10_inv2	Chr10:50741163-87216736	36475573		dir Ventura et al., 2011		dir Ventura et al., 2011	hg38_ponAbe2_3 hg38_ponAbe2_11 hg38_ponAbe2_37 hg38_ponAbe2_10	inv Ventura et al., 2011	hg38_rheMac8_9 hg38_rheMac8_40 hg38_rheMac8_1 hg38_rheMac8_22 hg38_rheMac8_18 hg38_rheMac8_7	inv Ventura et al., 2007		HSA-PTR-GGO	yes
Chr10_inv3	Chr10:105534957-107833058	2298101							hg38_rheMac8_16	false: dir by BES pair mapping false: dir by FISH			no
Chr10_inv4	Chr10:80658598-82460816	1802218							hg38_rheMac8_20	false: dir by FISH			no
Chr10_inv5	Chr10:87429953-88775900	1345947					hg38_ponAbe2_20	false: dir by BES pair mapping					yes
Chr10_inv6	Chr10:46870207-47457081	586874	hg38_panTro5_27	inv by FISH		inv by FISH	hg38_ponAbe2_26	inv by FISH	hg38_rheMac8_23	inv by FISH		HSA	yes	Polymorphic in human (present study)
Chr10_inv7	Chr10:79923086-80209920	286834	hg38_panTro5_40	ND									yes	Polymorphic in human (Sanders et al., 2016)
Chr10_inv8	Chr10:45866801-46092941	226140					hg38_ponAbe2_41	ND					yes
Chr11_inv1	Chr11:3603695-71568887	67965192		dir Ventura et al., 2011		dir Ventura et al., 2011	hg38_ponAbe2_2 hg38_ponAbe2_7 hg38_ponAbe2_16	inv Ventura et al., 2011	hg38_rheMac8_TOP_25 hg38_rheMac8_TOP_49	inv Ventura et al., 2007		HSA-PTR-GGO	yes
Chr11_inv2	Chr11:61253334-61496892	243558							hg38_rheMac8_77	ND			no
Chr12_inv1	Chr12:20822597-67987723	47165126	hg38_panTro5_8 hg38_panTro5_50 hg38_panTro5_4 hg38_panTro5_13	inv Ventura et al., 2011		dir Ventura et al., 2011		dir Ventura et al., 2011		dir Ventura et al., 2007		PTR	no
Chr12_inv2	Chr12:21190337-64901919	43711582		dir Ventura et al., 2011	hg38_gorGor4_18 hg38_gorGor4_7 hg38_gorGor4_65 hg38_gorGor4_53 hg38_gorGor4_1 hg38_gorGor4_17	inv Ventura et al., 2011		dir Ventura et al., 2011		dir Ventura et al., 2007		GGO	no
Chr12_inv3	Chr12:132743008-133241224	498216							hg38_rheMac8_TOP_102	ND			yes
Chr12_inv4	Chr12:122453357-122805209	351852							hg38_rheMac8_58	false: dir by BES pair mapping			no
Chr12_inv5	Chr12:131943088-132180809	237721							hg38_rheMac8_78	false: dir by BES pair mapping			no
Chr12_inv6	Chr12:131356268-131521398	165130	hg38_panTro5_53	false: dir by BES pair mapping									yes
Chr12_inv7	Chr12:9293186-9408602	115416	hg38_panTro5_67	ND									yes
Chr13_inv1	Chr13:113827516-114153778	326262							hg38_rheMac8_TOP_111	false: dir by BES pair mapping			no
Chr13_inv2	Chr13:104797611-105108126	310515		dir by BES pair mapping		dir by BES pair mapping		dir by BES pair mapping	hg38_rheMac8_62	inv by BES pair mapping inv by BAC illumina sequencing	dir by BES pair mapping	MMU	no
Chr13_inv3	Chr13:113745900-113964579	218679					hg38_ponAbe2_43	false: dir by BES pair mapping					no
Chr13_inv4	Chr13:113751367-113945080	193713			hg38_gorGor4_45	ND							no
Chr14_inv1	Chr14:18891607-45300420	26408813		dir Ventura et al., 2011	hg38_gorGor4_TOP_27	inv Ventura et al., 2011		dir Ventura et al., 2011		dir Ventura et al., 2007		GGO	yes
Chr14_inv2	Chr14:19714886-20148024	433138		dir by BES pair mapping		dir by BES pair mapping		dir by BES pair mapping	hg38_rheMac8_TOP_105	inv by BES pair mapping inv by BAC illumina sequencing	ND	ND	yes
Chr14_inv3	Chr14:105574624-105956112	381488							hg38_rheMac8_53	ND			yes
Chr14_inv4	Chr14:106561425-106805521	244096							hg38_rheMac8_75	ND			yes
Chr15_inv1	Chr15:28852754-30406229	1553475	panTro5_hg38_33 hg38_panTro5_35	inv by FISH		dir by FISH		inv by FISH		inv by FISH		HSA-PTR-GGO; ILS or recurrent inv in PTR	yes
Chr15_inv2	Chr15:72795783-74063586	1267803							hg38_rheMac8_27	false: dir by FISH			yes
Chr15_inv3	Chr15:25957911-27087847	1129936							hg38_rheMac8_52 hg38_rheMac8_35	false: dir by BES pair mapping			no
Chr15_inv4	Chr15:22420314-23123481	703167			hg38_gorGor4_19	ND	hg38_ponAbe2_25	ND	hg38_rheMac8_TOP_99	ND			yes
Chr16_inv1	Chr16:70075634-74327699	4252065		inv by FISH		dir by FISH	hg38_ponAbe2_33 hg38_ponAbe2_15	inv by FISH	hg38_rheMac8_21 hg38_rheMac8_29 hg38_rheMac8_97	inv by FISH		HSA	yes
Chr16_inv2	Chr16:16571302-18436486	1865184							hg38_rheMac8_TOP_85	ND			yes
Chr16_inv3	Chr16:28781227-30210335	1429107		inv Nuttle et al., 2016		ND	hg38_ponAbe2_39 hg38_ponAbe2_27	dir Nuttle et al., 2016		dir by BES pair mapping dir by BAC illumina sequencing		PTR	yes
Chr16_inv4	Chr16:2872845-4223242	1350397							hg38_rheMac8_25	false: dir by FISH			no
Chr16_inv5	Chr16:34962662-36253738	1291076	hg38_panTro5_26	ND									yes	Polymorphic in human (Sanders et al., 2016)
Chr16_inv6	Chr16:76468474-77745478	1277004							hg38_rheMac8_26	false: dir by BES pair mapping false: dir by FISH			no
Chr16_inv7	Chr16:28378167-29034255	656088		dir Nuttle et al., 2016		ND	hg38_ponAbe2_39	inv Nuttle et al., 2016	hg38_rheMac8_36	inv by BES pair mapping inv by BAC illumina sequencing		HSA-PTR	yes
Chr16_inv8	Chr16:29640910-30210335	569425		inv Nuttle et al., 2016		ND	hg38_ponAbe2_27	inv Nuttle et al., 2016 inv by FISH		inv by FISH		HSA-PTR	yes	Two independent inversions involving this region occurred during primates evolution, therefore this region in chimpanzee appears to be in the opposite orientation respect to humans
Chr16_inv9	Chr16:35090356-35367482	277126							hg38_rheMac8_TOP_116	ND			yes
Chr16_inv10	Chr16:31012037-31247558	235521							hg38_rheMac8_80	false: dir by BES pair mapping			no
Chr16_inv11	Chr16:65673523-65868382	194859		dir by BES pair mapping		dir by BES pair mapping		dir by BES pair mapping	hg38_rheMac8_89	inv by BES pair mapping inv by BAC illumina sequencing	dir by BES pair mapping dir by BAC illumina sequencing	MMU	no
Chr16_inv12	Chr16:29640793-29748137	107344							hg38_rheMac8_119	ND			no
Chr17_inv1	Chr17:8027676-49543141	41515465	hg38_panTro5_10 hg38_panTro5_23 hg38_panTro5_3	inv by FISH inv Cardone et al. 2008		dir Cardone et al., 2008		dir Cardone et al., 2008		dir Ventura et al., 2007		PTR	no
Chr17_inv2	Chr17:47478620-59586678	12108058		dir Ventura et al., 2011		dir Ventura et al., 2011	hg38_ponAbe2_6	inv Ventura et al., 2011	hg38_rheMac8_3	inv Ventura et al., 2007		HSA-PTR-GGO	yes
Chr17_inv3	Chr17:37926957-45527618	7600661					hg38_ponAbe2_9	false: dir by FISH					yes
Chr17_inv4	Chr17:15812020-16664213	852193		dir by FISH		dir by FISH		dir/inv by FISH	hg38_rheMac8_31	inv by FISH		Great apes	yes
Chr17_inv5	Chr17:46573086-47013619	440533					hg38_ponAbe2_32	ND	hg38_rheMac8_50	ND			yes
Chr17_inv6	Chr17:47113100-47441195	328095							hg38_rheMac8_61	ND			yes
Chr17_inv7	Chr17:3064892-3217165	152273		dir by BES pair mapping		dir by BES pair mapping		dir by BES pair mapping	hg38_rheMac8_98	inv by BES pair mapping inv by BAC illumina sequencing	ND	ND	yes
Chr17_inv8	Chr17:60007755-60110885	103130							hg38_rheMac8_122	ND			yes
Chr18_inv1	Chr18:112546-15275658	15163112	hg38_panTro5_TOP_26	inv Ventura et al., 2011	hg38_gorGor4_TOP_30	inv Ventura et al., 2011	hg38_ponAbe2_TOP_29	inv Ventura et al., 2011	hg38_rheMac8_TOP_67	inv Ventura et al., 2007		HSA	yes
Chr18_inv2	Chr18:64235250-65639687	1404437							hg38_rheMac8_24	false: dir by BES pair mapping false: dir by FISH			no
Chr18_inv3	Chr18:70885697-71666858	781161		dir by BES pair mapping dir by FISH		dir by BES pair mapping dir by FISH		dir by BES pair mapping dir by FISH	hg38_rheMac8_33	inv by BES pair mapping inv by BAC illumina sequencing inv by FISH	dir by BES pair mapping dir by FISH	MMU	no
Chr18_inv4	Chr18:13244741-13926507	681766							hg38_rheMac8_TOP_97	ND			no
Chr18_inv5	Chr18:78238876-78606092	367216							hg38_rheMac8_56	false: dir by BES pair mapping			no
Chr18_inv6	Chr18:68257880-68546524	288644		dir by BES pair mapping dir by BAC illumina sequencing		dir by BES pair mapping dir by BAC illumina sequencing		dir by BES pair mapping dir by BAC illumina sequencing	hg38_rheMac8_69	inv by BES pair mapping inv by BAC illumina sequencing	dir by BES pair mapping	MMU	yes
Chr18_inv7	Chr18:73572681-73849640	276959		dir by BES pair mapping		dir by BES pair mapping		dir by BES pair mapping	hg38_rheMac8_72	inv by BES pair mapping inv by BAC illumina sequencing	dir by BES pair mapping	MMU	no
Chr18_inv8	Chr18:5677162-5815084	137922		dir by BES pair mapping dir by BAC illumina sequencing		dir by BES pair mapping dir by BAC illumina sequencing		ND	hg38_rheMac8_103	inv by BES pair mapping inv by BAC illumina sequencing	dir by BES pair mapping dir by BAC illumina sequencing	MMU	no
Chr19_inv1	Chr19:55552553-58578053	3025500							hg38_rheMac8_TOP_78	false: dir by BES pair mapping			yes
Chr19_inv2	Chr19:36331795-37251831	920036	hg38_panTro5_34 hg38_panTro5_44 hg38_panTro5_47	inv by FISH inv Feuk et al., 2005		dir by FISH dir Feuk et al., 2005		dir by FISH		dir by FISH		PTR	yes
Chr19_inv3	Chr19:23107814-23524774	416960							hg38_rheMac8_51	false: dir by BES pair mapping			yes
Chr19_inv4	Chr19:20286707-20455932	169225	hg38_panTro5_52	ND									yes
Chr19_inv5	Chr19:22386870-22521363	134493			hg38_gorGor4_63	ND							yes
Chr19_inv6	Chr19:20397347-20531341	133994							hg38_rheMac8_104	ND			yes
Chr20_inv1	Chr20:67297-25738777	25671480		dir Ventura et al., 2011		dir Ventura et al., 2011		dir Ventura et al., 2011	hg38_rheMac8_TOP_41	inv Ventura et al., 2007		HSA-PTR-GGO	yes
Chr20_inv2	Chr20:67297-5540425	5473128		dir Ventura et al., 2011		dir Ventura et al., 2011	hg38_ponAbe2_TOP_31	inv Ventura et al., 2011		dir Ventura et al., 2007		PPY	yes
Chr20_inv3	Chr20:29727359-30283254	555895	hg38_panTro5_32	ND									no
Chr21_inv1	Chr21:41831161-42139573	308412							hg38_rheMac8_64	false: dir by BES pair mapping			no
Chr22_inv1	Chr22:20701254-21010362	309108							hg38_rheMac8_63	ND			yes
Chr22_inv2	Chr22:32162675-32270248	107573							hg38_rheMac8_118	false: dir by BES pair mapping			yes
Summary of all the experimental validations performed in the present and previous studies. In red are shown false inversions, in green regions found to be in inverted orientation and in blue regions in direct orientation. Dir= direct orientation; inv= inverted orientation; ND= not determined; HSA=Homo sapiens; PTR=Pan troglodytes; GGO=Gorilla gorilla; PAB=Pongo abelii; PPY=Pongo pygmaeus; MMU=Mac…

## Sheet: Table S4
Table S4. Inversions validations by FISH.
Inversion	Mapping (GRCh38/hg38)	Size	calls	Human		Chimpanzee		Gorilla		Orangutan		Macaque		Marmoset (Outgroup)	Notes
				GM12878	GM19129	PTR8	PTR12	GGO2	GGO5	PPY9	PPY10	MMU1	MMU2	CJA98
Chr1_inv2	Chr1:109669122-143585425	33916303	hg38_panTro5_2	dir/dir by FISH	dir/dir by FISH	dir/dir by FISH	dir/dir by FISH
Chr1_inv3a	Chr1:147079442-147925603	846161	hg38_panTro5_22; hg38_ponAbe2_22	inv/inv by FISH	inv/inv by FISH	dir/dir by FISH	dir/dir by FISH	inv/inv by FISH	inv/inv by FISH	dir/dir by FISH	dir/dir by FISH	dir/dir by FISH	dir/dir by FISH		human build38 ref wrong orientation or minor allele
Chr3_inv10	Chr3:186699837-188752536	2052699	hg38_rheMac8_17	dir/dir by FISH	dir/dir by FISH							dir/dir by FISH	dir/dir by FISH
Chr4_inv5b	Chr4:4182444-9339607	5157163	hg38_ponAbe2_13	dir/dir by FISH	dir/dir by FISH	ND	dir/dir by FISH	inv/inv by FISH	inv/inv by FISH	inv/inv by FISH	inv/inv by FISH	inv/inv by FISH	inv/inv by FISH
Chr5_inv2c	Chr5:99582578-100374690	792112	hg38_ponAbe2_24; hg38_rheMac8_32	dir/dir by FISH	dir/dir by FISH	dir/inv by FISH	dir/dir by FISH	dir/inv by FISH	inv/inv by FISH	inv/inv by FISH	inv/inv by FISH	inv/inv by FISH	dir/inv by FISH
Chr6_inv2	Chr6:103919901-107373900	3453999	hg38_rheMac8_15; hg38_rheMac8_37	dir/dir by FISH	dir/dir by FISH							dir/dir by FISH	dir/dir by FISH
Chr7_inv3	Chr7:13519980-18852902	5332922	hg38_rheMac8_19; hg38_rheMac8_11	dir/dir by FISH	dir/dir by FISH							dir/dir by FISH	dir/dir by FISH
Chr7_inv4	Chr7:143818519-149042315	5223796	hg38_rheMac8_8	dir/dir by FISH	dir/dir by FISH							dir/dir by FISH	dir/dir by FISH
Chr7_inv6	Chr7:71693970-74869950	3175980	panTro5_hg38_31; hg38_panTro5_21	dir/dir by FISH	dir/dir by FISH	inv/inv by FISH	dir/inv by FISH	dir/dir by FISH	dir/dir by FISH	dir/dir by FISH	dir/dir by FISH	dir/dir by FISH	dir/dir by FISH
Chr7_inv7	Chr7:53872256-56412238	2539982	hg38_rheMac8_TOP_81	dir/dir by FISH	dir/dir by FISH							dir/dir by FISH	dir/dir by FISH
Chr7_inv8	Chr7:72893718-74869947	1976229	hg38_rheMac8_30; hg38_rheMac8_49	dir/dir by FISH	dir/dir by FISH	dir/dir by FISH	dir/dir by FISH	dir/dir by FISH	dir/dir by FISH	dir/dir by FISH	dir/dir by FISH	inv/inv by FISH	inv/inv by FISH
Chr7_inv10	Chr7:53188941-53862225	673284	hg38_panTro5_30	dir/dir by FISH	dir/dir by FISH	inv/inv by FISH	inv/inv by FISH	inv/inv by FISH	inv/inv by FISH	inv/inv by FISH	inv/inv by FISH	inv/inv by FISH	inv/inv by FISH
Chr7_inv11	Chr7:5166718-5797984	631266	hg38_rheMac8_39	dir/dir by FISH	dir/dir by FISH							dir/dir by FISH	dir/dir by FISH
Chr8_inv3	Chr8:50265124-53564460	3299336	hg38_rheMac8_12	dir/dir by FISH	dir/dir by FISH							dir/dir by FISH	dir/dir by FISH
Chr8_inv4	Chr8:40821116-43284035	2462919	hg38_rheMac8_TOP_82	dir/dir by FISH	dir/dir by FISH							dir/dir by FISH	dir/dir by FISH
Chr10_inv3	Chr10:105534957-107833058	2298101	hg38_rheMac8_16	dir/dir by FISH	dir/dir by FISH							dir/dir by FISH	dir/dir by FISH
Chr10_inv4	Chr10:80658598-82460816	1802218	hg38_rheMac8_20	dir/dir by FISH	dir/dir by FISH							dir/dir by FISH	dir/dir by FISH
Chr10_inv6d	Chr10:46870207-47457081	586874	hg38_panTro5_27; hg38_ponAbe2_26; hg38_rheMac8_23	dir/inv by FISH	dir/inv by FISH	inv/inv by FISH	ND	ND	inv/inv by FISH	inv/inv by FISH	inv/inv by FISH	inv/inv by FISH	inv/inv by FISH
Chr15_inv1	Chr15:28852754-30406229	1553475	panTro5_hg38_33; hg38_panTro5_35	dir/dir by FISH	dir/dir by FISH	inv/inv by FISH	inv/inv by FISH	dir/dir by FISH	dir/dir by FISH	inv/inv by FISH	inv/inv by FISH	inv/inv by FISH	dir/inv by FISH	dir/inv by FISH
Chr15_inv2	Chr15:72795783-74063586	1267803	hg38_rheMac8_27	dir/dir by FISH	dir/dir by FISH							dir/dir by FISH	dir/dir by FISH
Chr16_inv1	Chr16:70075634-74327699	4252065	hg38_ponAbe2_33; hg38_ponAbe2_15; hg38_rheMac8_21; hg38_rheMac8_29; hg38_rheMac8_97	dir/dir by FISH	dir/dir by FISH	inv/inv by FISH	inv/inv by FISH	dir/dir by FISH	dir/dir by FISH	inv/inv by FISH	inv/inv by FISH	inv/inv by FISH	inv/inv by FISH
Chr16_inv4	Chr16:2872845-4223242	1350397	hg38_rheMac8_25	dir/dir by FISH	dir/dir by FISH							dir/dir by FISH	dir/dir by FISH
Chr16_inv6	Chr16:76468474-77745478	1277004	hg38_rheMac8_26	dir/dir by FISH	dir/dir by FISH							dir/dir by FISH	dir/dir by FISH
Chr16_inv8	Chr16:29640910-30210335	569425	hg38_ponAbe2_27	dir/dir by FISH	dir/dir by FISH	inv/inv by FISH	inv/inv by FISH	ND	ND	inv/inv by FISH	inv/inv by FISH	inv/inv by FISH	inv/inv by FISH		Unclear FISH results in GGO
Chr17_inv1	Chr17:8027676-49543141	41515465	hg38_panTro5_10; hg38_panTro5_23; hg38_panTro5_3	dir/dir by FISH	ND	inv/inv by FISH	ND	ND	ND	ND	ND	ND	ND		Inversion validated in Cardone et al., 2008. FISH in PTR performed to validate breakpoints
Chr17_inv3	Chr17:37926957-45527618	7600661	hg38_ponAbe2_9	dir/dir by FISH	dir/dir by FISH					dir/dir by FISH	dir/dir by FISH
Chr17_inv4	Chr17:15812020-16664213	852193	hg38_rheMac8_31	dir/dir by FISH	dir/dir by FISH	dir/dir by FISH	dir/dir by FISH	dir/dir by FISH	dir/dir by FISH	dir/inv by FISH	dir/inv by FISH	inv/inv by FISH	inv/inv by FISH
Chr18_inv2	Chr18:64235250-65639687	1404437	hg38_rheMac8_24	dir/dir by FISH	dir/dir by FISH							dir/dir by FISH	dir/dir by FISH
Chr18_inv3	Chr18:70885697-71666858	781161	hg38_rheMac8_33	dir/dir by FISH	dir/dir by FISH	dir/dir by FISH	dir/dir by FISH	dir/dir by FISH	dir/dir by FISH	dir/dir by FISH	dir/dir by FISH	inv/inv by FISH	inv/inv by FISH	dir/dir by FISH
Chr19_inv2	Chr19:36331795-37251831	920036	hg38_panTro5_34; hg38_panTro5_44; hg38_panTro5_47	dir/dir by FISH	dir/dir by FISH	inv/inv by FISH	inv/inv by FISH	dir/dir by FISH	dir/dir by FISH	dir/dir by FISH	dir/dir by FISH	dir/dir by FISH	dir/dir by FISH
FISH results for all the inversion calls cytogenetically investigated. At least two individuals per call have been tested for each species.
a Eight additional human individuals have been tested for this inversion (GM12156, GM18157, GM18502, GM18507, GM18555, GM18956, GM19240, GM20127) and resulted being homozygous for the inverted orientation.
b This inversion has been tested also on PTR1 and resulted being homozygous for the direct orientation.
c WI2-2874O16 has been used as internal probe2 for hybridizations on gorilla nuclei because of a deletion of the region containing RP11-467C9.
d More individuals have been tested for this inversion. Results are as follows: GM12156 dir/dir; GM18956 dir/inv, PTR5 inv/inv, GGO8 inv/inv.

## Sheet: Table S5
Table S5. Clones used for FISH assays.
Inversion	Mapping (GRCh38/hg38)	Size	calls	metaphase/interphase FISH	internal probe 1	Mapping (GRCh38/hg38)	internal probe 2	Mapping (GRCh38/hg38)	external probe	Mapping (GRCh38/hg38)
Chr1_inv2	Chr1:109669122-143585425	33916303	hg38_panTro5_2	metaphase	WI2-3251D14	Chr1:109985938-110028882	WI2-1118O17	Chr1:117918955-117959421
Chr1_inv3	Chr1:147079442-147925603	846161	hg38_panTro5_22; hg38_ponAbe2_22	interphase	WI2-1991P06	Chr1:147119447-147157022	WI2-1864C10	Chr1:147877335-147920034	WI2-3559A01	Chr1:145694865-145735595
Chr3_inv10	Chr3:186699837-188752536	2052699	hg38_rheMac8_17	interphase	RP11-689C17	Chr3:186858528-187018019	RP11-1152O7	Chr3:188460512-188605228	RP11-481E22	Chr3:189359574-189518605
Chr4_inv5	Chr4:4182444-9339607	5157163	hg38_ponAbe2_13	metaphase	WI2-0485P10	Chr4:4748998-4791735	WI2-2655L19	Chr4:8226254-8265237
Chr5_inv2a	Chr5:99582578-100374690	792112	hg38_ponAbe2_24; hg38_rheMac8_32	interphase	RP11-467C9	Chr5:100165949-100300209	RP11-350L5	Chr5:99590473-99730988	RP11-368A20	Chr5:100723546-100904478
Chr6_inv2	Chr6:103919901-107373900	3453999	hg38_rheMac8_15; hg38_rheMac8_37	interphase	WI2-2840C22	Chr6:103949401-103988094	WI2-1971C10	Chr6:107297076-107333750	WI2-2534L10	Chr6:107397038-107439025
Chr7_inv3	Chr7:13519980-18852902	5332922	hg38_rheMac8_19; hg38_rheMac8_11	interphase	WI2-455G21	Chr7:13550858-13593597	WI2-3496M23	Chr7:18785911-18822937	WI2-2240K12	Chr7:18885686-18926573
Chr7_inv4	Chr7:143818519-149042315	5223796	hg38_rheMac8_8	interphase	WI2-491B21	Chr7:143438551-143474997	WI2-1692N22	Chr7:148991283-149032207	WI2-827H23	Chr7:149060779-149100894
Chr7_inv6	Chr7:71693970-74869950	3175980	panTro5_hg38_31; hg38_panTro5_21	interphase	RP11-460F3	Chr7:71906422-72099037	RP11-351B3	Chr7:74291333-74485290	WI2-3210F8	Chr7:71630295-71670184
Chr7_inv7	Chr7:53872256-56412238	2539982	hg38_rheMac8_TOP_81	interphase	RP11-1104O10	Chr7:54414220-54603431	RP11-621M8	Chr7:55312759-55482944	RP11-876P22	Chr7:53493035-53682086
Chr7_inv8	Chr7:72893718-74869947	1976229	hg38_rheMac8_30; hg38_rheMac8_49	interphase	RP11-601B17	Chr7:73621193-73791292	RP11-351B3	Chr7:74291333-74485290	RP11-963I7	Chr7:72274612-72446444
Chr7_inv10	Chr7:53188941-53862225	673284	hg38_panTro5_30	interphase	RP11-1056A8	Chr7:53219276-53393831	RP11-775N3	Chr7:53698860-53847188	RP11-478G18	Chr7:54169444-54328931
Chr7_inv11	Chr7:5166718-5797984	631266	hg38_rheMac8_39	interphase	WI2-0732E21	Chr7 5172494 5212056	WI2-0443O20	Chr7:5662060-5696909	WI2-1826A11	Chr7:4888775-4929343
Chr8_inv3	Chr8:50265124-53564460	3299336	hg38_rheMac8_12	interphase	WI2-2075A5	Chr8:50296740-50339419	WI2-2945D23	Chr8:53460029-53497830	WI2-782F1	Chr8:50210708-50248682
Chr8_inv4	Chr8:40821116-43284035	2462919	hg38_rheMac8_TOP_82	interphase	RP11-939C8	Chr8:40866458-41040867	RP11-875E16	Chr8:42715015-42889182	RP11-1066P10	Chr8:40513146-40695681
Chr10_inv3	Chr10:105534957-107833058	2298101	hg38_rheMac8_16	interphase	WI2-2629B2	Chr10:105611260-105652887	WI2-1673D12	Chr10:107742312-107783361	WI2-1699F23	Chr10:105467988-105509479
Chr10_inv4	Chr10:80658598-82460816	1802218	hg38_rheMac8_20	interphase	RP11-1030I16	Chr10:80731662-80895351	RP11-319L5	Chr10:82171421-82353450	RP11-690O22	Chr10:82676700-82841922
Chr10_inv6	Chr10:46870207-47457081	586874	hg38_panTro5_27; hg38_ponAbe2_26; hg38_rheMac8_23	interphase	WI2-1893P04	Chr10:47015953-47060596	WI2-3172G20	Chr10:47386006-47427580	WI2-2905C01	Chr10:48215634-48255065
Chr15_inv1	Chr15:28852754-30406229	1553475	panTro5_hg38_33; hg38_panTro5_35	interphase	WI2-1722N20	Chr15:28921466-28964295	RP11-300A12	Chr15:29494056-29668994	RP11-640H21	Chr15:27894428-28091240
Chr15_inv2	Chr15:72795783-74063586	1267803	hg38_rheMac8_27	interphase	WI2-1551G5	Chr15:72808358-72845824	WI2-3701P1	Chr15:73993686-74032879	WI2-1763I5	Chr15:74126186-74167942
Chr16_inv1	Chr16:70075634-74327699	4252065	hg38_ponAbe2_33; hg38_ponAbe2_15; hg38_rheMac8_21; hg38_rheMac8_29; hg38_rheMac8_97	interphase	WI2-2368K2	Chr16:70302736-70337924	WI2-1279O11	Chr16:73674254-73714730	RP11-779G13	Chr16:69651397-69803431
Chr16_inv4	Chr16:2872845-4223242	1350397	hg38_rheMac8_25	interphase	RP11-619M1	Chr16:3108729-3292062	RP11-876F24	Chr16:3991175-4169898	RP11-707M17	Chr16:4506492-4707218
Chr16_inv6	Chr16:76468474-77745478	1277004	hg38_rheMac8_26	interphase	WI2-1773I19	Chr16:76483921-76520797	WI2-3622O10	Chr16:77694226-77731083	WI2-1991O15	Chr16:76420717-76458358
Chr16_inv8	Chr16:29640910-30210335	569425	hg38_ponAbe2_27	interphase	WI2-2372K22	Chr16:29640341-29683607	WI2-0475F01	Chr16:30118974-30154488	WI2-0669B08	Chr16:30580940-30619130
Chr17_inv1	Chr17:8027676-49543141	41515465	hg38_panTro5_10; hg38_panTro5_23; hg38_panTro5_3	metaphase	RP11-716B22	Chr17:9365271-9540719			RP11-1061G5	Chr17:5523893-5747137
Chr17_inv3	Chr17:37926957-45527618	7600661	hg38_ponAbe2_9	interphase	WI2-0742F08	Chr17:39323359-39360602	WI2-1396P17	Chr17:45336602-45377168	WI2-1245L21	Chr17:38551955-38595945
Chr17_inv4	Chr17:15812020-16664213	852193	hg38_rheMac8_31	interphase	WI2-2003N04	Chr17:15897662-15935137	RP11-468C12	Chr17:16474507-16639090	RP11-168B19	Chr17:15132464-15313891
Chr18_inv2	Chr18:64235250-65639687	1404437	hg38_rheMac8_24	interphase	RP11-790D3	Chr18:64393384-64570966	RP11-910H24	Chr18:65302814-65492246	RP11-784O21	Chr18:63982106-64156366
Chr18_inv3	Chr18:70885697-71666858	781161	hg38_rheMac8_33	interphase	RP11-777O8	Chr18:70984765-71153033	RP11-766F3	Chr18:71497515-71669271	RP11-1083E23	Chr18:72012785-72183871
Chr19_inv2	Chr19:36331795-37251831	920036	hg38_panTro5_34; hg38_panTro5_44; hg38_panTro5_47	interphase	RP11-1148D20	Chr19:36359500-36519499	RP11-1088H16	Chr19:37017955-37186306	RP11-587I9	Chr19:37699822-37923408
BAC and fosmid clones used for cytogenetic validations of the inversions and their localization on human reference genome build38.
a Fosmid WI2-2874O16 has been used as internal probe2 for the hybridizations on gorilla because of a deletion of the region containing the BAC clone RP11-467C9.

## Sheet: Table S6
Table S6. Clones used to validate the calls by sequencing or BES pair mapping.
Inversion	Mapping (GRCh38/hg38)	Size	Inversion real/false	Inversion calls	Illumina sequenced clones	BES pair mapping
Chr1_inv6	Chr1:248121676-248295646	173970	real	hg38_rheMac8_94	CH250-498E22;CH250-359L17	CH251-541E21;CH277-442D21;CH276-345E10;CH250-498E22; CH250-359L17
Chr1_inv7	Chr1:194242717-194399262	156545	real	hg38_ponAbe2_55	CH251-208F22;CH277-33N7;CH276-252K6;CH276-176F16;CH250-343I17	CH251-208F22;CH277-33N7;CH276-252K6; CH276-176F16;CH250-343I17;CH259-53C6
Chr1_inv8	Chr1:46948073-47050839	102766	real	hg38_rheMac8_125		CH251-224E17;CH277-50L1;CH250-160H3;CH259-274E5
Chr2_inv3	Chr2:148935019-149268767	333748	false	hg38_rheMac8_60		CH250-312L23
Chr2_inv4	Chr2:137588644-137750208	161564	real	rheMac8_hg38_98	CH251-24J13;CH250-105B21	CH251-24J13;CH277-433M12;CH276-399M16;CH250-105B21;CH259-92D14
Chr3_inv7	Chr3:30228770-34045405	3816635	false	hg38_rheMac8_TOP_14		CH250-308D10;CH250-115J8
Chr3_inv8	Chr3:18884855-22381724	3496869	false	hg38_rhemac8_70; hg38_rhemac8_13		CH250-355A8;CH250-367M7
Chr3_inv9	Chr3:34049924-36611427	2561503	false	hg38_rheMac8_TOP_21		CH250-115J8
Chr3_inv11	Chr3:28684346-30222659	1538313	false	hg38_rheMac8_TOP_30		CH250-442P16;CH250-308D10
Chr4_inv6	Chr4:104354664-107550508	3195844	false	hg38_rheMac8_14		CH250-450K19
Chr4_inv7	Chr4:155179430-155723644	544214	false	hg38_rheMac8_43	CH250-383M15;CH250-436N5	CH250-383M15; CH250-436N5
Chr4_inv8	Chr4:80834037-81178590	344553	false	hg38_rheMac8_59		CH250-399L19; CH250-326I9
Chr4_inv9	Chr4:178205683-178375658	169975	real	hg38_rheMac8_96	CH251-334D15;CH277-386L8;CH276-300D10;CH250-265A13;CH259-444M5	CH251-334D15;CH277-386L8;CH276-300D10;CH250-265A13;CH259-444M5
Chr5_inv2	Chr5:99582578-100374690	792112	real	hg38_ponAbe2_24; hg38_rheMac8_32	CH251-547F8; CH277-402N12;CH276-245K21;CH250-261D16;CH250-496E13	CH251-547F8; CH277-402N12;CH276-245K21;CH250-261D16; CH250-496E13
Chr5_inv3	Chr5:99584037-100069297	485260	real	hg38_panTro5_60; hg38_panTro5_38	CH251-551N15	CH251-551N15
Chr5_inv4	Chr5:8767190-8984256	217066	real	hg38_rheMac8_84	CH250-180D14	CH251-129D11;CH277-111G14;CH276-22O6;CH250-180D14;CH259-15A3
Chr6_inv3	Chr6:61111416-61270467	159051	false	hg38_gorGor4_56		CH277-234F5
Chr7_inv3	Chr7:13519980-18852902	5332922	false	hg38_rheMac8_19; hg38_rheMac8_11		CH250-216E8; CH250-212I12
Chr7_inv6	Chr7:71693970-74869950	3175980	real	panTro5_hg38_31; hg38_panTro5_21	CH251-222K13	CH251-222K13;CH250-85M13
Chr7_inv10	Chr7:53188941-53862225	673284	real	hg38_panTro5_30	CH251-371B13;CH277-209D19;CH277-98F11;CH250-369M13;CH259-388G19	CH251-371B13;CH277-209D19; CH277-98F11;CH276-292C11;CH250-369M13;CH259-388G19
Chr7_inv12	Chr7:119289791-119798781	508990	real	hg38_rheMac8_45	CH251-555D20;CH277-449H5;CH276-257D12;CH250-283D21;CH259-434I4	CH251-555D20;CH277-449H5;CH276-257D12;CH250-283D21;CH259-434I4
Chr7_inv13	Chr7:138697687-139063153	365466	false	hg38_rheMac8_57		CH250-310B20
Chr7_inv14	Chr7:52889416-53184622	295206	false	hg38_rheMac8_68		CH250-502B18; CH250-335O3
Chr7_inv15	Chr7:798810-1030741	231931	false	hg38_panTro5_TOP_36		CH251-297P2
Chr7_inv16	Chr7:125524041-125732150	208109	real	hg38_rheMac8_86		CH251-555C23;CH277-279D9;CH276-360P4;CH250-123M18;CH259-176C13
Chr7_inv18	Chr7:2531298-2671789	140491	real	hg38_rheMac8_101	CH276-266M8;CH250-355K12;CH250-380O12	CH251-294P16;CH277-46C23;CH276-266M8;CH250-355K12; CH250-380O12
Chr8_inv3	Chr8:50265124-53564460	3299336	false	hg38_rheMac8_12		CH250-400A18; CH250-426N6
Chr8_inv5	Chr8:46758255-47331971	573716	false	hg38_rheMac8_TOP_100		CH250-113A22
Chr9_inv4	Chr9:24424656-24553856	129200	real	hg38_rheMac8_107	CH251-302E5;CH277-344M8;CH276-103E20;CH250-454A13	CH251-302E5;CH277-344M8;CH276-103E20;CH250-454A13;CH259-112A20
NA	Chr10:75198408-77671255	2472847	NA	between hg38_rheMac8_22 and hg38_rheMac8_18 (Chr10_inv2)		CH250-170O20
Chr10_inv3	Chr10:105534957-107833058	2298101	false	hg38_rheMac8_16		CH250-216G12; CH250-437D12
Chr10_inv5	Chr10:87429953-88775900	1345947	false	hg38_ponAbe2_20		CH276-1O16							yes
Chr12_inv4	Chr12:122453357-122805209	351852	false	hg38_rheMac8_58		CH250-278K14
Chr12_inv5	Chr12:131943088-132180809	237721	false	hg38_rheMac8_78		CH250-186P19;CH250-230E16
Chr12_inv6	Chr12:131356268-131521398	165130	false	hg38_panTro5_53		CH251-236F8
Chr13_inv1	Chr13:113827516-114153778	326262	false	hg38_rheMac8_TOP_111		CH250-425G13
Chr13_inv2	Chr13:104797611-105108126	310515	real	hg38_rheMac8_62	CH250-437H21	CH251-167H19;CH277-502F22;CH276-368L19;CH250-437H21;CH259-507G9
Chr13_inv3	Chr13:113745900-113964579	218679	false	hg38_ponAbe2_43		CH276-289D14
Chr14_inv2	Chr14:19714886-20148024	433138	real	hg38_rheMac8_TOP_105	CH250-392A15	CH251-328P13;CH277-552N11;CH276-409H20;CH250-392A15
Chr15_inv3	Chr15:25957911-27087847	1129936	false	hg38_rheMac8_52; hg38_rheMac8_35		CH250-336A11
Chr16_inv3	Chr16:28781227-30210335	1429107	real	hg38_ponAbe2_39; hg38_ponAbe2_27	CH250-134C11	CH250-134C11
Chr16_inv6	Chr16:76468474-77745478	1277004	false	hg38_rheMac8_26		CH250-348K16; CH250-425F16
Chr16_inv7	Chr16:28378167-29034255	656088	real	hg38_rheMac8_36	CH250-531D15	CH250-531D15
Chr16_inv10	Chr16:31012037-31247558	235521	false	hg38_rheMac8_80		CH250-513M13
Chr16_inv11	Chr16:65673523-65868382	194859	real	hg38_rheMac8_89	CH250-113E6;CH259-156F12	CH251-76H15;CH277-427E13;CH276-94E18;CH250-113E6;CH259-156F12
Chr17_inv7	Chr17:3064892-3217165	152273	real	hg38_rheMac8_98	CH250-372I5;CH250-353A8	CH251-319K1;CH277-64N21;CH276-81N9;CH250-372I5;CH250-353A8
Chr18_inv2	Chr18:64235250-65639687	1404437	false	hg38_rheMac8_24		CH250-316F9
Chr18_inv3	Chr18:70885697-71666858	781161	real	hg38_rheMac8_33	CH250-491D8	CH251-67G22;CH277-564J13;CH276-77B7;CH250-352F3;CH250-491D8;CH259-210I20
Chr18_inv5	Chr18:78238876-78606092	367216	false	hg38_rheMac8_56		CH250-372E1
Chr18_inv6	Chr18:68257880-68546524	288644	real	hg38_rheMac8_69	CH251-168D14;CH277-477O5;CH276-35H16;CH250-208C9	CH251-168D14;CH277-477O5;CH276-35H16;CH250-208C9;CH250-169N3; CH259-409B17
Chr18_inv7	Chr18:73572681-73849640	276959	real	hg38_rheMac8_72	CH250-484D20	CH251-347N12;CH277-88P22;CH276-211F15;CH250-484D20;CH259-375A3
Chr18_inv8	Chr18:5677162-5815084	137922	real	hg38_rheMac8_103	CH251-526L2;CH277-383M2;CH250-401F1;CH259-370O1	CH251-526L2;CH277-383M2;CH250-401F1;CH259-370O1
Chr19_inv1	Chr19:55552553-58578053	3025500	false	hg38_rheMac8_TOP_78		CH250-171N17
Chr19_inv3	Chr19:23107814-23524774	416960	false	hg38_rheMac8_51		CH250-316B15
Chr21_inv1	Chr21:41831161-42139573	308412	false	hg38_rheMac8_64		CH250-284E21
Chr22_inv2	Chr22:32162675-32270248	107573	false	hg38_rheMac8_118		CH250-530L10
List of the chimpanzee (CH251), gorilla (CH277), orangutan (CH276), macaque (CH250) and marmoset (CH259) BAC clones used to validate the predicted inversions.

## Sheet: Table S7
Table S7. Errors in human and nonhuman primate reference genome assemblies.
Misassembled region		In the reference of	Species specific mapping	Supporting evidence	Notes	Type of misassembly
Mapping (GRCh38/hg38)	Size
Chr1:109669122-143585425	33916303	PTR	Pan_tro 3.0/panTro5: Chr1:112102713-126481863	FISH	hg38_panTro5_2 (Chr1_inv2)	false calls (39)
Chr2:148935019-149268767	333748	MMU	BCM Mmul_8.0.1/rheMac8: Chr12:35457391-35807091	BES pair mapping	hg38_rheMac8_60 (Chr2_inv3)
Chr3:18884855-22381724	3496869	MMU	BCM Mmul_8.0.1/rheMac8: Chr2:175533285-179064865	BES pair mapping	hg38_rhemac8_70; hg38_rhemac8_13 (Chr3_inv8)
Chr3:28684346-30222659	1538313	MMU	BCM Mmul_8.0.1/rheMac8: Chr2:185450207-187013678	BES pair mapping	hg38_rheMac8_TOP_30 (Chr3_inv11)
Chr3:30228770-34045405	3816635	MMU	BCM Mmul_8.0.1/rheMac8: Chr2:187013678-190894850	BES pair mapping	hg38_rheMac8_TOP_14 (Chr3_inv7)
Chr3:34049924-36611427	2561503	MMU	BCM Mmul_8.0.1/rheMac8: Chr2:192950426-195474649	BES pair mapping	hg38_rheMac8_TOP_21 (Chr3_inv9)
Chr3:186699837-188752536	2052699	MMU	BCM Mmul_8.0.1/rheMac8: Chr2:190895735-192928880	FISH	hg38_rheMac8_17 (Chr3_inv10)
Chr4:104354664-107550508	3195844	MMU	BCM Mmul_8.0.1/rheMac8: Chr5:102841885-106019113	BES pair mapping	hg38_rheMac8_14 (Chr4_inv6)
Chr4:155179430-155723644	544214	MMU	BCM Mmul_8.0.1/rheMac8: Chr5:155056499-155659264	BES pair mapping; BAC illumina sequencing	hg38_rheMac8_43 (Chr4_inv7)
Chr4:80834037-81178590	344553	MMU	BCM Mmul_8.0.1/rheMac8: Chr5:53197819-53530516	BES pair mapping	hg38_rheMac8_59 (Chr4_inv8)
Chr6:103919901-107373900	3453999	MMU	BCM Mmul_8.0.1/rheMac8: Chr4:102804692-106425513	FISH	hg38_rheMac8_15; hg38_rheMac8_37 (Chr6_inv2)
Chr6:61111416-61270467	159051	GGO	gorGor4.1/gorGor4: Chr6:62999727-63180473	BES pair mapping	hg38_gorGor4_56 (Chr6_inv3)
Chr7:143818519-149042315	5223796	MMU	BCM Mmul_8.0.1/rheMac8: Chr3:170031517-175359020	FISH	hg38_rheMac8_8 (Chr7_inv4)
Chr7:13519980-18852902	5332922	MMU	BCM Mmul_8.0.1/rheMac8: Chr3:89338903-94865653	BES pair mapping; FISH	hg38_rheMac8_19; hg38_rheMac8_11 (Chr7_inv3)
Chr7:53872256-56412238	2539982	MMU	BCM Mmul_8.0.1/rheMac8: Chr3:53194639-55796830	FISH	hg38_rheMac8_TOP_81 (Chr7_inv7)
Chr7:5166718-5797984	631266	MMU	BCM Mmul_8.0.1/rheMac8: Chr3:39221609-39900137	FISH	hg38_rheMac8_39 (Chr7_inv11)
Chr7:138697687-139063153	365466	MMU	BCM Mmul_8.0.1/rheMac8: Chr3:165036708-165402460	BES pair mapping	hg38_rheMac8_57 (Chr7_inv13)
Chr7:52889416-53184622	295206	MMU	BCM Mmul_8.0.1/rheMac8: Chr3:52091183-52396553	BES pair mapping	hg38_rheMac8_68 (Chr7_inv14)
Chr7:798810-1030741	231931	PTR	Pan_tro 3.0/panTro5: Chr7:34847-272981	BES pair mapping	hg38_panTro5_TOP_36 (Chr7_inv15)
Chr8:50265124-53564460	3299336	MMU	BCM Mmul_8.0.1/rheMac8: Chr8:47886909-51496001	BES pair mapping; FISH	hg38_rheMac8_12 (Chr8_inv3)
Chr8:40821116-43284035	2462919	MMU	BCM Mmul_8.0.1/rheMac8: Chr8:41426532-43971500	FISH	hg38_rheMac8_TOP_82 (Chr8_inv4)
Chr8:46758255-47331971	573716	MMU	BCM Mmul_8.0.1/rheMac8: Chr8:43971603-44501809	BES pair mapping	hg38_rheMac8_TOP_100 (Chr8_inv5)
Chr10:105534957-107833058	2298101	MMU	BCM Mmul_8.0.1/rheMac8: Chr9:101342170-103683347	BES pair mapping; FISH	hg38_rheMac8_16 (Chr10_inv3)
Chr10:80658598-82460816	1802218	MMU	BCM Mmul_8.0.1/rheMac8: Chr9:50108281-51965231	FISH	hg38_rheMac8_20 (Chr10_inv4)
Chr12:122453357-122805209	351852	MMU	BCM Mmul_8.0.1/rheMac8: Chr11:50354128-50727796	BES pair mapping	hg38_rheMac8_58 (Chr12_inv4)
Chr12:131356268-131521398	165130	PTR	Pan_tro 3.0/panTro5: Chr12:135142402-135310190	BES pair mapping	hg38_panTro5_53 (Chr12_inv6)
Chr13:113827516-114153778	326262	MMU	BCM Mmul_8.0.1/rheMac8: Chr17:95243380-95534194	BES pair mapping	hg38_rheMac8_TOP_111 (Chr13_inv1)
Chr13:113745900-113964579	218679	PPY	WUGSC 2.0.2/ponAbe2: Chr13:116363316-116590354	BES pair mapping	hg38_ponAbe2_43 (Chr13_inv3)
Chr15:72795783-74063586	1267803	MMU	BCM Mmul_8.0.1/rheMac8: Chr7:49805197-51076570	FISH	hg38_rheMac8_27 (Chr15_inv2)
Chr15:25957911-27087847	1129936	MMU	BCM Mmul_8.0.1/rheMac8: Chr7:2825381-3964953	BES pair mapping	hg38_rheMac8_52; hg38_rheMac8_35 (Chr15_inv3)
Chr16:2872845-4223242	1350397	MMU	BCM Mmul_8.0.1/rheMac8: Chr20:2717284-4068037	FISH	hg38_rheMac8_25 (Chr16_inv4)
Chr16:76468474-77745478	1277004	MMU	BCM Mmul_8.0.1/rheMac8: Chr20:60829945-62247019	BES pair mapping; FISH	hg38_rheMac8_26 (Chr16_inv6)
Chr17:37926957-45527618	7600661	PPY	WUGSC 2.0.2/ponAbe2: Chr17:43897486-51006983	FISH	hg38_ponAbe2_9 (Chr17_inv3)
Chr18:64235250-65639687	1404437	MMU	BCM Mmul_8.0.1/rheMac8: Chr18:53884117-55307882	BES pair mapping; FISH	hg38_rheMac8_24 (Chr18_inv2)
Chr18:78238876-78606092	367216	MMU	BCM Mmul_8.0.1/rheMac8: Chr18:68331855-68675824	BES pair mapping	hg38_rheMac8_56 (Chr18_inv5)
Chr19:55552553-58578053	3025500	MMU	BCM Mmul_8.0.1/rheMac8: Chr19:50762505-53633884	BES pair mapping	hg38_rheMac8_TOP_78 (Chr19_inv1)
Chr19:23107814-23524774	416960	MMU	BCM Mmul_8.0.1/rheMac8: Chr19:22338196-22887890	BES pair mapping	hg38_rheMac8_51 (Chr19_inv3)
Chr21:41831161-42139573	308412	MMU	BCM Mmul_8.0.1/rheMac8: Chr3:4519178-4833256	BES pair mapping	hg38_rheMac8_64 (Chr21_inv1)
Chr22:32162675-32270248	107573	MMU	BCM Mmul_8.0.1/rheMac8: Chr10:74068727-74159572	BES pair mapping	hg38_rheMac8_118 (Chr22_inv2)
Chr1:194242717-194399262	156545	MMU	BCM Mmul_8.0.1/rheMac8: Duplicated Chr1:171030940-171158273; Chr1:172627608-172663170; ChrUn_NW_015084169v1:31-937	present study	same as Chr1_inv7	assembly in direct orientation but found to be inverted by studying the evolution of inversions called in other species (14)
Chr1:147079442-147925603	846161	HSA, PTR, GGO, PPY	Pan_tro 3.0/panTro5: Chr1:110597625-111480265; gorGor4.1/gorGor4: Chr1:126300642-127175067; WUGSC 2.0.2/ponAbe2: Chr1:106323685-107228575	present study	same as Chr1_inv3
Chr2:94725912-111484366	16758454	MMU	BCM Mmul_8.0.1/rheMac8: Chr13:91407490-106599353	Ventura et al., 2007	same as Chr2_inv1
Chr4:4182444-9339607	5157163	GGO, MMU	gorGor4.1/gorGor4: Chr4:4300670-8924257; BCM Mmul_8.0.1/rheMac8: Chr5:4377583-9054834	present study	same as Chr4_inv5
Chr5:99582578-100374690	792112	GGO	gorGor4.1/gorGor4: Chr5:82541219-83099812	present study	same as Chr5_inv2
Chr7:39545072-43961659	4416587	GGO	gorGor4.1/gorGor4: Chr7:40036582-44551625	Feuk et al., 2005	same as Chr7_inv5
Chr7:53188941-53862225	673284	GGO, PPY, MMU	gorGor4.1/gorGor4: Chr7:53912437-54583454; WUGSC 2.0.2/ponAbe2: Chr7:29703715-30473097; BCM Mmul_8.0.1/rheMac8: Chr3:52396662-53185119	present study; Feuk et al., 2005	same as Chr7_inv10
Chr7:2531298-2671789	140491	PPY	WUGSC 2.0.2/ponAbe2: Chr7:2477308-2623194	present study	same as Chr7_inv18
Chr7:5997690-6732324	734634	GGO	gorGor4.1/gorGor4: Chr7:5828540-6549288	Feuk et al., 2005	same as Chr7_inv9
Chr8:8242347-12174746	3932399	GGO	gorGor4.1/gorGor4: Chr8:7438701-11359929	Antonacci et al., 2009	same as Chr8_inv2
Chr10:46870207-47457081	586874	GGO	gorGor4.1/gorGor4: Chr10:62279523-63003769	present study	same as Chr10_inv6
Chr15:28852754-30406229	1553475	PPY, MMU	WUGSC 2.0.2/ponAbe2: Duplicated Chr15:24980065-26391684; Chr15:28089475-28420088; BCM Mmul_8.0.1/rheMac8: Duplicated Chr7:5473584-6753636; Chr7:8028309-8431254; Chr1:164065664-164143389	present study	same as Chr15_inv1
Chr16:29640910-30210335	569425	PTR, MMU	Pan_tro 3.0/panTro5: Chr16:28618980-29182970; BCM Mmul_8.0.1/rheMac8: Duplicated: Chr20:27395550-27566692; Chr6:37740172-37879808; Chr20:27805682-27925640; Chr20:28158293-28343597	present study; Nuttle et al., 2016	same as Chr16_inv8
Chr16:28781227-30210335	1429107	PTR	Pan_tro 3.0/panTro5: Chr16:28375884-29182970	present study; Nuttle et al., 2016	same as Chr16_inv3
Chr9:38733849-86315785	47581936	PTR	Pan_tro 3.0/panTro5: Chr9:39636675-63997218	Ventura et al., 2011		assembly in direct orientation but shown to be inverted in previous studies (5)
Chr15:29893632-32747423	2853791	GGO	Chr15:8016411-10611563	Antonacci et al., 2014
Chr15:1-31438802	31438801	PTR	Pan_tro 3.0/panTro5: Chr15:3000001-11676887	Ventura et al., 2011
Chr16:21555408-21733364	177956	HSA, PTR, GGO	Pan_tro 3.0/panTro5: Chr16:21142531-21323532; gorGor4.1/gorGor4: Chr16:21791563-21952173	Antonacci et al., 2010
Chr16:21933445-22423067	489622	HSA, GGO	gorGor4.1/gorGor4: Chr16:22141566-22642325	Antonacci et al., 2010
Chr1:226673786-228664283	1990497	MMU	BCM Mmul_8.0.1/rheMac8: Chr1:137650599-204850917	Ventura et al., 2007	hg38_rheMac8_TOP_51_46 wrong breakpoint (Chr1_inv1)	wrong inversion call breakpoint (13)
Chr4:48892517-51817234	2924717	GGO	gorGor4.1/gorGor4: Split Chr4:48777749-59283457; Chr3:77217137-77244480; Chr3:77217137-77244491	Ventura et al., 2011	gorGor4_hg38_5 (Chr4_inv3)
Chr4:49076722-51817234	2740512	PPY	WUGSC 2.0.2/ponAbe2: Split Chr4:50641145-50710143; Chr9:90369011-90433708; Chr2a:3112089-3141948	Ventura et al., 2011	hg38_ponAbe2_17 (Chr4_inv4)
Chr4:49076722-51819117	2742395	MMU	BCM Mmul_8.0.1/rheMac8: Split Chr15:110770662-110804597; Chr15:110770662-110804597; Chr15:110800959-110826268	Ventura et al., 2007	hg38_rheMac8_TOP_72 (Chr4_inv2)
Chr7:92102828-98244638	6141810	MMU	BCM Mmul_8.0.1/rheMac8: Chr3:117384983-123582212	Ventura et al., 2007	hg38_rheMac8_TOP_58 (Chr7_inv1)
Chr14:1-18891607	18891606	GGO	gorGor4.1/gorGor4: Split Chr21:4349830-4472953; Chr16:33404881-33543030	Ventura et al., 2011	hg38_gorGor4_TOP_27 (Chr14_inv1)
Chr16:28471792-28590699	118908	MMU	BCM Mmul_8.0.1/rheMac8: Chr20:27,604,155-27,733,276	Nuttle et al., 2016	hg38_rheMac8_36 (Chr16_inv7)
Chr17:59586678-62384187	2797509	PPY	WUGSC 2.0.2/ponAbe2: Duplicated Chr17_random:74812-3001303; Chr17:50867012-52130464	Ventura et al., 2011	hg38_ponAbe2_6 (Chr17_inv2)
Chr17:59429924-62384187	2954263	MMU	BCM Mmul_8.0.1/rheMac8: Chr16:52914971-55983449	Ventura et al., 2007	hg38_rheMac8_3 (Chr17_inv2)
Chr18:15275658-21440479	6164821	PTR	Pan_tro 3.0/panTro5: Split Chr18:17944916-18439944; Chr2B:18504099-18614209	Ventura et al., 2011	hg38_panTro5_TOP_26 (Chr18_inv1)
Chr18:14928065-21440479	6512414	GGO	gorGor4.1/gorGor4: Split Chr18:17489259-17973944; Chr21:18916696-19116616; Chr11:135124556-135175929	Ventura et al., 2011	hg38_gorGor4_TOP_30 (Chr18_inv1)
Chr18:14585009-21440479	6855470	PPY	WUGSC 2.0.2/ponAbe2: Split Chr18:32615969-33150094; Chr21:28448592-28703856; Chr11:131936775-131988939	Ventura et al., 2011	hg38_ponAbe2_TOP_29 (Chr18_inv1)
Chr20:25738777-30199893	4461116	MMU	BCM Mmul_8.0.1/rheMac8: Split Chr7:23357240-23430661; Chr5:190334617-190417478; Chr7:23357240-23430663	Ventura et al., 2007	hg38_rheMac8_TOP_41 (Chr20_inv1)
Chr10:75198408-77671255	2472847	MMU	BCM Mmul_8.0.1/rheMac8: Chr9:54668508-57133149	BES pair mapping	between hg38_rheMac8_22 and hg38_rheMac8_18 (Chr10_inv2)	interval of sequence in direct orientation in between inversion calls, but verified as inverted (3)
Chr11:54525074-56749017	2223943	PPY	WUGSC 2.0.2/ponAbe2: Split Chr11:85703832-85792716; Chr11:20205829-20236129; Chr2a_random:12637074-12651288	Ventura et al., 2011	between centromere and hg38_ponAbe2_7 (Chr11_inv1)
Chr17:15524542-17030338	1505796	PTR	Pan_tro 3.0/panTro5: Duplicated Chr17:40598061-40998321; Chr17:37618511-40787780; Chr17:37841757-37942695	FISH (same as Chr17_inv4)	between hg38_panTro5_10 and hg38_panTro5_23 (Chr17_inv1)

## Sheet: Table S8
Table S8. Repeat content at macaque specific inversions breakpoints.
Inversion	Mapping (GRCh38/hg38)	Size	In the ancestor of	Repetitive sequences at BPs
Chr2_inv4	Chr2:137588644-137750208	161564	MMU	SINEs
Chr5_inv4	Chr5:8767190-8984256	217066	MMU	SINEs
Chr6_inv1	Chr6:107985526-158930335	50944809	OWM	SINEs
Chr7_inv12	Chr7:119289791-119798781	508990	MMU	LINES
Chr9_inv4	Chr9:24424656-24553856	129200	MMU	no similarity
Chr13_inv2	Chr13:104797611-105108126	310515	MMU	no similarity
Chr16_inv11	Chr16:65673523-65868382	194859	MMU	SINEs
Chr18_inv3	Chr18:70885697-71666858	781161	MMU	SINEs
Chr18_inv7	Chr18:73572681-73849640	276959	MMU	SINEs
Chr18_inv8	Chr18:5677162-5815084	137922	MMU	LINES
Shown is the repeat content of a 10 kb interval surrounding the macaque inversions breakpoints free in segmental duplication. BP, breakpoint.

## Sheet: Table S9
Table S9. Breakpoint ranges of each validated inversion call.
Inversion	Chr	Predicted inversion BP1	Predicted inversion BP	Size	Validated BP1	Supporting evidence	Validated BP2	Supporting evidence	Reference
Chr1_inv1	Chr1	162833348	226673786	63840438	Chr1:162797452-162989250	FISH clone RP11-331H2	Chr1:228608365-228664283	FISH clone RP4-621O15	Ventura et al., 2007
Chr1_inv3	Chr1	147079442	147925603	846161	Chr1:146048497-147119447	FISH clone WI2-1991P06 and segmental duplications interval	Chr1:147920034-149876379	FISH clone WI2-1864C10 and segmental duplications interval	Present study
Chr1_inv6	Chr1	248121676	248295646	173970	Chr1:248114058-248121676	Inversion call (hg38_rheMac8_94) and Illumina reads mapping (CH250-498E22 and CH250-359L17)	Chr1:248295646-248300544	Inversion call (hg38_rheMac8_94) and Illumina reads mapping (CH250-498E22 and CH250-359L17)	Present study
Chr1_inv7	Chr1	194242717	194399262	156545	Chr1:194224859-194242717	Inversion call (hg38_ponAbe2_55) and Illumina reads mapping (CH276-252K6, CH276-176F16 and CH250-343I17)	Chr1:194396201-194399262	Inversion call (hg38_ponAbe2_55) and Illumina reads mapping (CH276-252K6, CH276-176F16 and CH250-343I17)	Present study
Chr1_inv8	Chr1	46948073	47050839	102766	Chr1:46921732-46948073	BES pair mapping (CH251-224E17) and segmental duplications interval	Chr1:47050839-47122930	BES pair mapping (CH277-50L1, CH250-160H3, CH259-274E5) and segmental duplications interval	Present study
Chr2_inv1	Chr2	94725912	111484366	16758454	Chr2:90096605-95237897	FISH clones RP11-316G9 and RP11-468G5	Chr2:95745562-113748162	FISH clones RP11-351J10 and RP11-243I5	Ventura et al., 2011
Chr2_inv2	Chr2	113672156	130394273	16722117	Chr2:95745562-113748162	FISH clones RP11-351J10 and RP11-243I5	Chr2:130488823-132030786	FISH clones RP11-1072O15 and RP11-314N19	Ventura et al., 2011
Chr2_inv4	Chr2	137588644	137750208	161564	Chr2:137588644-137589287	Inversion call (rheMac8_hg38_98) and Illumina reads mapping (CH250-105B21)	Chr2:137750208-137754266	Inversion call (rheMac8_hg38_98) and Illumina reads mapping (CH250-105B21)	Present study
Chr3_inv1	Chr3	15146425	75596563	60450138	Chr3:15029274-15146425	FISH clone RP11-616M11 and inversion call (hg38_ponAbe2_TOP_11_A)	Chr3:75496760-75865404	FISH clones RP11-634L22 and RP11-180C9	Ventura et al., 2011
Chr3_inv2	Chr3	130212773	186699833	56487060	Chr3:129925368-130298779	FISH clones RP11-924M2 and RP11-787P10	Chr3:186619392-186798214	FISH clone RP11-177B11	Ventura et al., 2007
Chr3_inv3	Chr3	90162433	129999065	39836632	Chr3:89538807-93786011	FISH clones RP11-547K2 and RP11-124L3	Chr3:129075064-130145831	FISH clones RP11-26M12 and RP11-787P10	Ventura et al., 2011
Chr3_inv4	Chr3	36489743	75280684	38790941	Chr3:36489743-36641639	FISH clone RP11-240N7	Chr3:75221499-75,970,792	FISH clones RP11-634L22 and RP11-1053M22 and segmental duplications interval	Ventura et al., 2007
Chr3_inv5	Chr3	11775	15122602	15110827	Chr3:1-4311538	FISH clone RP11-183N22	Chr3:15029274-15197286	FISH clone RP11-616M11	Ventura et al., 2007 and present study
Chr3_inv6	Chr3	11778	12551308	12539530	Chr3:1-619490	FISH clone RP11-151A4	Chr3:12425258-12632538	FISH clone RP11-732C9	Ventura et al., 2011 and present study
Chr4_inv1	Chr4	44809658	85037105	40227447	Chr4:44809658-44834236	FISH clone RP11-779N22 and inversion call (hg38_panTro5_6)	Chr4:84898851-85121691	FISH clone RP11-367P3	Ventura et al., 2011 and present study
Chr4_inv2	Chr4	51819117	85065524	33246407	Chr4:49076721-51819117	FISH clones RP11-317G22, RP11-365H22 and inversion call (hg38_rheMac8_TOP_72)	Chr4:84898851-85121691	FISH clone RP11-367P3	Ventura et al., 2007 and present study
Chr4_inv3	Chr4	51817234	68876438	17059204	Chr4:49076721-51817234	FISH clone RP11-317G22 and inversion call (gorGor4_hg38_5)	Chr4:68346491-69202438	FISH clones RP11-669F1 and RP11-704M14	Ventura et al., 2011 and present study
Chr4_inv4	Chr4	51817234	68708533	16891299	Chr4:49076721-51817234	FISH clone RP11-317G22 and inversion calls (hg38_ponAbe2_17, hg38_ponAbe2_5)	Chr4:68346491-69202438	FISH clones RP11-669F1 and RP11-704M14	Ventura et al., 2011 and present study
Chr4_inv5	Chr4	4182444	9339607	5157163	Chr4:3881338-4240270	Segmental duplications interval	Chr4:8941445-9800170	Segmental duplications interval	Present study
Chr4_inv9	Chr4	178205683	178375658	169975	Chr4:178191632-178205683	Inversion call (hg38_rheMac8_96) and Illumina reads mapping (CH250-265A13 and CH259-444M5)	Chr4:178374995-178375658	Inversion call (hg38_rheMac8_96) and Illumina reads mapping (CH250-265A13 and CH259-444M5)	Present study
Chr5_inv1	Chr5	18553211	96585715	78032504	Chr5:18467472-23020320	FISH clones RP11-875A6 and RP11-12C2	Chr5:94102204-96710693	FISH clones RP11-297G19 and RP11-1147K5	Ventura et al., 2011
Chr5_inv2	Chr5	99582578	100374690	792112	Chr5:99390627-99582578	Illumina reads mapping (CH251-547F8, CH277-402N12, CH276-245K21, CH250-261D16, CH250-496E13) and segmental duplications interval	Chr5:100330900-100401226	Illumina reads mapping (CH251-547F8, CH277-402N12, CH276-245K21, CH250-261D16, CH250-496E13) and segmental duplications interval	Present study
Chr5_inv3	Chr5	99584037	100069297	485260	Chr5:99390627-99585662	Segmental duplications interval and Illumina reads mapping (CH251-551N15)	Chr5:100055045-100107193	Segmental duplications interval and Illumina reads mapping (CH251-551N15)	Present study
Chr5_inv4	Chr5	8767190	8984256	217066	Chr5:8767190-8767403	Inversion call (hg38_rheMac8_84) and Illumina reads mapping (CH250-180D14)	Chr5:8984256-8991804	Inversion call (hg38_rheMac8_84) and Illumina reads mapping (CH250-180D14)	Present study
Chr6_inv1	Chr6	107985526	158930335	50944809	Chr6:107985526-108219397	FISH clone RP11-815N24 and inversion call (hg38_rheMac8_TOP_20_65)	Chr6:158636758-158930335	FISH clone RP11-507C10 and inversion call (hg38_rheMac8_TOP_20_65)	Ventura et al., 2007 and present study
Chr7_inv1	Chr7	7000214	97873929	90873715	Chr7:6385923-7221664	FISH clones RP11-1080O3 and RP11-1061P7	97589942-98244638	FISH clones RP11-150J17 and RP11-652L7	Ventura et al., 2011
Chr7_inv2	Chr7	77068178	102476575	25408397	Chr7:76971010-77068178	FISH clones RP11-243I17, RP11-982E3 and inversion call (hg38_gorGor4_12)	Chr7:102436322-102476575	FISH clones RP11-163E9, RP11-803J14 and inversion call (hg38_gorGor4_3)	Ventura et al., 2011 and present study
Chr7_inv5	Chr7	39545072	43961659	4416587	Chr7:39545072-39890440	FISH clone RP11-321C5 and inversion call (hg38_panTro5_25)	Chr7:43433701-43961659	FISH clone RP11-81F19 and inversion call (hg38_panTro5_15)	Feuk et al., 2005 and present study
Chr7_inv6	Chr7	71693970	74869950	3175980	Chr7:71693970-71692966	Inversion call (panTro5_hg38_31) and Illumina reads mapping (CH251-222K13)	Chr7:74728174-75528717	Segmental duplications interval	Present study
Chr7_inv8	Chr7	72893718	74869947	1976229	Chr7:72524834-73416985	Segmental duplications interval	Chr7:74728174-75528717	Segmental duplications interval	Present study
Chr7_inv9	Chr7	5997690	6732324	734634	Chr7:5997690-6019714	FISH clone RP11-119N18 and inversion call (hg38_panTro5_29)	Chr7:6732324-6740692	FISH clone RP11-188M14 and inversion call (hg38_panTro5_29)	Feuk et al., 2005 and present study
Chr7_inv10	Chr7	53188941	53862225	673284	Chr7:53121616-53188941	Illumina reads mapping (CH251-371B13, CH277-209D19, CH277-98F11, CH250-369M13 and CH259-388G19)	Chr7:53862225-53875234	Illumina reads mapping (CH251-371B13, CH277-209D19, CH277-98F11, CH250-369M13 and CH259-388G19)	Present study
Chr7_inv12	Chr7	119289791	119798781	508990	Chr7:119289791-119294057	Inversion call (hg38_rheMac8_45) and Illumina reads mapping (CH250-283D21)	Chr7:119798781-119799191	Inversion call (hg38_rheMac8_45) and Illumina reads mapping (CH250-283D21)	Present study
Chr7_inv16	Chr7	125524041	125732150	208109	Chr7:125390639-125611574	BES pair mapping (CH250-123M18 and CH250-353F15)	Chr7:125611574-125771249	BES pair mapping (CH250-353F15)	Present study
Chr7_inv18	Chr7	2531298	2671789	140491	Chr7:2531298-2531920	Illumina reads mapping (CH276-266M8, CH250-355K12, CH250-380O12) and segmental duplications interval	Chr7:2671789-2675531	Illumina reads mapping (CH276-266M8, CH250-355K12, CH250-380O12) and segmental duplications interval	Present study
Chr8_inv1	Chr8	30041741	85827206	55785465	Chr8:30041741-31265998	FISH clone RP11-363L24 and inversion call (hg38_gorGor4_8)	Chr8:84907027-85827206	FISH clones RP11-457E21, RP11-219B4 and inversion call (hg38_gorGor4_4)	Ventura et al., 2011 and present study
Chr8_inv2	Chr8	8242347	12174746	3932399	Chr8:8242347-8344193	FISH clone WI2-0785E15 and inversion call (hg38_ponAbe2_14)	Chr8:11435383-12174746	FISH clone WI2-3642O12 and inversion call (hg38_rheMac8_TOP_74)	Antonacci et al., 2009 and present study
Chr9_inv1	Chr9	49963	67830571	67780608	Chr9:1-625148	FISH clone RP11-130C19	Chr9:38733849-68643184	FISH clones RP11-788E5 and RP11-203L2	Ventura et al., 2011 and present study
Chr9_inv2	Chr9	42952578	96949325	53996747	Chr9:38774621-68837895	segmental duplications and FISH clone RP11-203L2	Chr9:96800364-97152497	FISH clones RP11-330M2 and RP11-520B13	Ventura et al., 2007
Chr9_inv4	Chr9	24424656	24553856	129200	Chr9:24424362-24424656	Inversion call (hg38_rheMac8_107) and Illumina reads mapping (CH250-454A13)	Chr9:24553649-24553856	Inversion call (hg38_rheMac8_107) and Illumina reads mapping (CH250-454A13)	Present study
Chr10_inv1	Chr10	27373003	79457365	52084362	Chr10:27144365-27975211	FISH clones RP11-378M14 and RP11-774G16	Chr10:79361587-79486833	FISH clones RP11-598H8 and RP11-715A21	Ventura et al., 2011
Chr10_inv2	Chr10	50741163	87216736	36475573	Chr10:50590496-50818888	FISH clones RP11-591H22	Chr10:87193550-87355835	FISH clones RP11-322M19	Ventura et al., 2007
Chr10_inv6	Chr10	46870207	47457081	586874	Chr10:46561417-46870207	Segmental duplications interval	Chr10:47457081-47500010	Segmental duplications interval	Present study
Chr11_inv1	Chr11	3603695	71568887	67965192	Chr11:3477398-6094939	FISH clones RP11-650F7 and RP11-645I8	Chr11:71568887-71847428	FISH clone RP11-757C15 and inversion call (hg38_ponAbe2_16)	Ventura et al., 2007, Ventura et al., 2011 and present study
Chr12_inv1	Chr12	20822597	67987723	47165126	Chr12:20738589-20946731	FISH clone RP11-994H16	Chr12:67910583-68100357	FISH clone RP11-356H4	Ventura et al., 2011
Chr12_inv2	Chr12	21190337	64901919	43711582	Chr12:21067904-21248347	FISH clone RP11-737A10	Chr12:64820602-65004827	FISH clone RP11-766N7	Ventura et al., 2011
Chr13_inv2	Chr13	104797611	105108126	310515	Chr13:104797611-104798719	Inversion call (hg38_rheMac8_62) and Illumina reads mapping (CH250-437H21)	Chr13:105108126-105115717	Inversion call (hg38_rheMac8_62) and Illumina reads mapping (CH250-437H21)	Present study
Chr14_inv1	Chr14	18891607	45300420	26408813	Chr14:1-20009384	FISH clone RP11-246M13	Chr14:45300420-45553531	FISH clone RP11-760N14 and inversion call (hg38_gorGor4_TOP_27)
Chr14_inv2	Chr14	19714886	20148024	433138	Chr14:19714886-19733046	Inversion call (hg38_rheMac8_TOP_105) and Illumina reads mapping (CH250-392A15)	Chr14:20148024-20175084	Inversion call (hg38_rheMac8_TOP_105) and Illumina reads mapping (CH250-392A15)	Present study
Chr15_inv1	Chr15	28852754	30406229	1553475	Chr15:28134730-28856539	Segmental duplications interval	Chr15:30076789-30900685	Segmental duplications interval	Present study
Chr16_inv1	Chr16	70075634	74327699	4252065	Chr16:69943596-70249668	Segmental duplications interval	Chr16:74328242-74430284	Segmental duplications interval	Present study
Chr16_inv3	Chr16	28781227	30210335	1429107	Chr16:28590813-28781227	Segmental duplications interval and Illumina reads mapping (CH250-134C11)	Chr16:30188533-30343458	Segmental duplications interval and Illumina reads mapping (CH250-134C11)	Present study
Chr16_inv7	Chr16	28378167	29034255	656088	Chr16:28327648-28471892	Segmental duplications interval and Illumina reads mapping (CH250-531D15)	Chr16:29034255-29638675	Segmental duplications interval and Illumina reads mapping (CH250-531D15)	Present study
Chr16_inv8	Chr16	29640910	30210335	569425	Chr16:29034255-30210335	Segmental duplications interval	Chr1630188533-30343458	Segmental duplications interval	Present study
Chr16_inv11	Chr16	65673523	65868382	194859	Chr16:65673218-65673523	Illumina reads mapping (CH250-113E6)	Chr16:65868382-65873210	Inversion call (hg38_rheMac8_89) and Illumina reads mapping (CH250-113E6)	Present study
Chr17_inv1	Chr17	8027676	49543141	41515465	Chr17:5747137-9365271	FISH clones RP11-1061G5 and RP11-716B22	Chr17:49485678-49672281	FISH clone RP5-1029K10	Ventura et al., 2011 and present study
Chr17_inv2	Chr17	47478620	59586678	12108058	Chr17:47434198-47478620	FISH clone RP11-771D19 and inversion call (hg38_rheMac8_3)	Chr17:62165250-62384187	FISH clones RP11-42F20 and RP11-1065F2	Ventura et al., 2011 and present study
Chr17_inv4	Chr17	15812020	16664213	852193	Chr17:15519640-15880697	Segmental duplications interval	Chr17:16656273-16906713	Segmental duplications interval	Present study
Chr17_inv7	Chr17	3064892	3217165	152273	Chr17:3050861-3092023	Illumina reads mapping (CH250-353A8) and segmental duplications interval	Chr17:3217165-3253425	Illumina reads mapping (CH250-372I5) and segmental duplications interval	Present study
Chr18_inv1	Chr18	112546	15275658	15163112	Chr18:1-2146810	FISH clone RP11-78H1	Chr18:12914962-21440479	FISH clonesRP11-96I11 and RP11-10G8	Ventura et al., 2011 and present study
Chr18_inv3	Chr18	70885697	71666858	781161	Chr18:70883499-70885697	Inversion call (hg38_rheMac8_33) and Illumina reads mapping (CH250-491D8)	Chr18:71666053-71666858	Inversion call (hg38_rheMac8_33) and Illumina reads mapping (CH250-491D8)	Present study
Chr18_inv6	Chr18	68257880	68546524	288644	Chr18:68242361-68257880	Inversion call (hg38_rheMac8_69) and Illumina reads mapping (CH250-208C9)	Chr18:68546524-68547346	Inversion call (hg38_rheMac8_69) and Illumina reads mapping (CH250-208C9)	Present study
Chr18_inv7	Chr18	73572681	73849640	276959	Chr18:73572681-73573408	Inversion call (hg38_rheMac8_72) and Illumina reads mapping (CH250-484D20)	Chr18:73849640-73849729	Inversion call (hg38_rheMac8_72) and Illumina reads mapping (CH250-484D20)	Present study
Chr18_inv8	Chr18	5677162	5815084	137922	Chr18:5677162-5677793	Inversion call (hg38_rheMac8_103) and Illumina reads mapping (CH250-401F1)	Chr18:5815084-5823164	Inversion call (hg38_rheMac8_103) and Illumina reads mapping (CH250-401F1)	Present study
Chr19_inv2	Chr19	36331795	37251831	920036	Chr19:36267213-36331795	Segmental duplications interval	Chr18:37251831-37336202	Segmental duplications interval	Present study
Chr20_inv1	Chr20	67297	25738777	25671480	Chr20:1-730561	FISH clone RP11-371L19	Chr20:25738777-30199893	FISH clone RP11-1036L7 and inversion call (hg38_rheMac8_TOP_41)	Ventura et al., 2011 and present study
Chr20_inv2	Chr20	67297	5540425	5473128	Chr20:1-730561	FISH clone RP11-371L19	Chr20:5415046-5599360	FISH clone RP11-684P7	Ventura et al., 2011 and present study

## Sheet: Table S10
Table S10. Genes mapping at the inversions breakpoints.
Breakpoint #	Breakpoint Mapping (GRCh38/hg38)	RefSeq	Description	Symbol	Status	Position (GRCh38/hg38)	Size	RefSeq summary (Aceview)
Chr1_inv1_BP2	Chr1:228608365-228664283	NR_023363.1	RNA, 5S ribosomal 1	RNA5S1	Provisional	Chr1:228610266-228610386	121
		NR_023364.1	RNA, 5S ribosomal 2	RNA5S2	Provisional	Chr1:228612507-228612627	121
		NR_023365.1	RNA, 5S ribosomal 3	RNA5S3	Provisional	Chr1:228614748-228614868	121
		NR_023366.1	RNA, 5S ribosomal 4	RNA5S4	Provisional	Chr1:228616989-228617109	121
		NR_023367.1	RNA, 5S ribosomal 5	RNA5S5	Provisional	Chr1:228619230-228619350	121
		NR_023368.1	RNA, 5S ribosomal 6	RNA5S6	Provisional	Chr1:228621445-228621565	121
		NR_023369.1	RNA, 5S ribosomal 7	RNA5S7	Provisional	Chr1:228623665-228623785	121
		NR_023370.1	RNA, 5S ribosomal 8	RNA5S8	Provisional	Chr1:228625907-228626027	121
		NR_023371.1	RNA, 5S ribosomal 9	RNA5S9	Provisional	Chr1:228628146-228628266	121
		NR_023372.1	RNA, 5S ribosomal 10	RNA5S10	Provisional	Chr1:228630388-228630508	121
		NR_023373.1	RNA, 5S ribosomal 11	RNA5S11	Provisional	Chr1:228632629-228632749	121
		NR_023374.1	RNA, 5S ribosomal 12	RNA5S12	Provisional	Chr1:228634869-228634989	121
		NR_023375.1	RNA, 5S ribosomal 13	RNA5S13	Provisional	Chr1:228637094-228637214	121
		NR_023376.1	RNA, 5S ribosomal 14	RNA5S14	Provisional	Chr1:228639335-228639455	121
		NR_023377.1	RNA, 5S ribosomal 15	RNA5S15	Provisional	Chr1:228641566-228641686	121
		NR_023378.1	RNA, 5S ribosomal 16	RNA5S16	Provisional	Chr1:228643807-228643927	121
		NR_037962.1	ras homolog family member U, transcript variant 2	RHOU	Reviewed	Chr1:228644647-228746669	102023	This gene encodes a member of the Rho family of GTPases. This protein can activate PAK1 and JNK1, and can induce filopodium formation and stress fiber dissolution. It may also mediate the effects of WNT1 signaling in the regulation of cell morphology, cytoskeletal organization, and cell proliferation. [provided by RefSeq].
		NR_002834.1	dual specificity phosphatase 5 pseudogene 1	DUSP5P1	Provisional	Chr1:228644910-228652412	7503
		NR_023379.1	RNA, 5S ribosomal 17	RNA5S17	Provisional	Chr1:228646038-228646158	121
Chr1_inv3_BP2	Chr1:147920603-147930603	NM_016334.4	G protein-coupled receptor 89B	GPR89B	Validated	Chr1:147928393-147993521	65129
Chr1_inv6_BP1	Chr1:248116676-248126676	NR_002141.1	olfactory receptor family 2 subfamily M member 1 pseudogene	OR2M1P	Provisional	Chr1:248122136-248122780	645	Olfactory receptors interact with odorant molecules in the nose, to initiate a neuronal response that triggers the perception of a smell. The olfactory receptor proteins are members of a large family of G-protein-coupled receptors (GPCR) arising from single coding-exon genes. Olfactory receptors share a 7-transmembrane domain structure with many neurotransmitter and hormone receptors and are resp…
Chr1_inv6_BP2	Chr1:248290646-248300646	NM_001004692.1	olfactory receptor family 2 subfamily T member 12	OR2T12	Provisional	Chr1:248294616-248295578	963	Olfactory receptors interact with odorant molecules in the nose, to initiate a neuronal response that triggers the perception of a smell. The olfactory receptor proteins are members of a large family of G-protein-coupled receptors (GPCR) arising from single coding-exon genes. Olfactory receptors share a 7-transmembrane domain structure with many neurotransmitter and hormone receptors and are resp…
Chr1_inv8_BP2	Chr1:47045839-47055839	NM_001320289.1	cytoChrome P450 family 4 subfamily X member 1, transcript variant 2	CYP4X1	Reviewed	Chr1:46961364-47050754	89391	This gene encodes a member of the cytochrome P450 superfamily of enzymes. The cytochrome P450 proteins are monooxygenases which catalyze many reactions involved in drug metabolism and synthesis of cholesterol, steroids and other lipids. The expression pattern of a similar rat protein suggests that this protein may be involved in neurovascular function in the brain. [provided by RefSeq].
		NM_001320290.1	cytoChrome P450 family 4 subfamily X member 1, transcript variant 3	CYP4X1	Reviewed	Chr1:47004240-47050754	46515
		NM_178033.1	cytoChrome P450 family 4 subfamily X member 1, transcript variant 1	CYP4X1	Reviewed	Chr1:47023568-47050751	27184
Chr3_inv5_BP1	Chr3:6775-16775	NR_110824.1	uncharacterized LOC102723448	LOC102723448	Validated	Chr3:11751-24501	12571
Chr3_inv6_BP1	Chr3:6778-16778	NR_110824.1	uncharacterized LOC102723448	LOC102723448	Validated	Chr3:11751-24501	12571
Chr3_inv4_BP1	Chr3:36484743-36494743	NM_001292049.1	SH3 and cysteine rich domain, transcript variant 2	STAC	Validated	Chr3:36380487-36548007	167521
		NM_003149.2	SH3 and cysteine rich domain, transcript variant 1	STAC	Validated	Chr3:36380487-36548007	167521
Chr3_inv2_BP1	Chr3:130207773-130217773	NR_027898.1	collagen type VI alpha 4 pseudogene 2	COL6A4P2	Provisional	Chr3:130212820-130273806	60987	This transcribed pseudogene represents the 3' end of a presumed ortholog to a mouse gene which encodes a collagen VI alpha 4 chain protein (GeneID 68553). The predicted ORF contains multiple premature stop codons. A large chromosome break separates this pseudogene from the 5' end of the presumed ortholog (DVWA, GeneID 344875) which is located upstream at chromosome 3p24.3. [provided by RefSeq].
Chr4_inv2_BP1	Chr4:51793952-51971936	NM_001040402.2	defective in cullin neddylation 1 domain containing 4, transcript variant 1	DCUN1D4	Validated	Chr4:51843000-51916837	73838
	:-	NM_015115.3	defective in cullin neddylation 1 domain containing 4, transcript variant 2	DCUN1D4	Validated	Chr4:51843000-51916837	73838
	:-	NM_001287755.1	defective in cullin neddylation 1 domain containing 4, transcript variant 3	DCUN1D4	Validated	Chr4:51843579-51916837	73259
	:-	NM_001287757.1	defective in cullin neddylation 1 domain containing 4, transcript variant 4	DCUN1D4	Validated	Chr4:51843000-51916837	73838
Chr4_inv3_BP1	Chr4:48892516-49076721	NM_001014446.2	OCIA domain containing 2, transcript variant 1	DCUN1D4	Validated	Chr4:48885380-48906828	21449
	:-	NM_152398.3	OCIA domain containing 2, transcript variant 2	DCUN1D4	Validated	Chr4:48885380-48906828	21449
	:-	NM_001286773.1	OCIA domain containing 2, transcript variant 3	OCIAD2	Validated	Chr4:48885380-48906828	21449
	:-	NM_001286774.1	OCIA domain containing 2, transcript variant 4	OCIAD2	Validated	Chr4:48885380-48906828	21449
	:-	NR_104589.1	OCIA domain containing 2, transcript variant 5	OCIAD2	Validated	Chr4:48885380-48906828	21449
	:-	NM_025087.2	cell wall biogenesis 43 C-terminal homolog, transcript variant 1	CWH43	Validated	Chr4:48986248-49062079	75832
	:-	NM_001286791.1	cell wall biogenesis 43 C-terminal homolog, transcript variant 2	CWH43	Validated	Chr4:48986642-49062079	75832
Chr4_inv5_BP2	Chr4:9334607-9344607	NM_001242328.1	ubiquitin specific peptidase 17-like family member 26	USP17L26	Inferred	Chr4:9334658-9336250	1593
	:-	NM_001242329.1	ubiquitin specific peptidase 17-like family member 5	USP17L5	Inferred	Chr4:9339403-9340995	1593
	:-	NM_001242330.1	ubiquitin specific peptidase 17-like family member 27	USP17L27	Inferred	Chr4:9344148-9345740	1593
Chr5_inv2_BP1	Chr5:99577578-99587578	NR_110562.1	uncharacterized LOC102724855	CTD-2151A2.1	Validated	Chr5:99533990-99577954	43965
Chr5_inv2_BP2	Chr5:100369690-100379690	NR_027503.1	glucuronidase beta pseudogene	LOC100133050	Validated	Chr5:100379505-100388254	8750
Chr7_inv1_BP2	Chr7:97789141-98244638	NM_133436.3	asparagine synthetase (glutamine-hydrolyzing), transcript variant 1	ASNS	Reviewed	Chr7:97852117-97872165	20049	The protein encoded by this gene is involved in the synthesis of asparagine. This gene complements a mutation in the temperature-sensitive hamster mutant ts11, which blocks progression through the G1 phase of the cell cycle at nonpermissive temperature. Alternatively spliced transcript variants have been described for this gene. [provided by RefSeq].
		NM_001178077.1	asparagine synthetase (glutamine-hydrolyzing), transcript variant 6	ASNS	Reviewed	Chr7:97852117-97872165	20049
		NM_183356.3	asparagine synthetase (glutamine-hydrolyzing), transcript variant 3	ASNS	Reviewed	Chr7:97852117-97872542	20426
		NM_001673.4	asparagine synthetase (glutamine-hydrolyzing), transcript variant 2	ASNS	Reviewed	Chr7:97852117-97872542	20426
		NM_001178075.1	asparagine synthetase (glutamine-hydrolyzing), transcript variant 4	ASNS	Reviewed	Chr7:97852117-97872542	20426
		NM_001178076.1	asparagine synthetase (glutamine-hydrolyzing), transcript variant 5	ASNS	Reviewed	Chr7:97852117-97872542	20426
		NR_049875.1	microRNA 5692a-1	MIR5692A1	Provisional	Chr7:97963658-97963726	69
		NR_049868.1	microRNA 5692c-2	MIR5692C2	Provisional	Chr7:97964405-97964481	77
		NR_002822.4	MGC72080 pseudogene	MGC72080	Provisional	Chr7:97966596-97972326	5731
		NM_006188.3	oncomodulin 2	OCM2	Reviewed	Chr7:97984700-97990104	5405	This gene is similar to the oncomodulin gene, a high-affinity calcium ion-binding protein that belongs to the superfamily of calmodulin proteins, also known as the EF-hand proteins. [provided by RefSeq].
		NM_014916.3	lemur tyrosine kinase 2	LMTK2	Reviewed	Chr7:98106885-98209633	102749	The protein encoded by this gene belongs to the protein kinase superfamily and the protein tyrosine kinase family. It contains N-terminal transmembrane helices and a long C-terminal cytoplasmic tail with serine/threonine/tyrosine kinase activity. This protein interacts with several other proteins, such as Inhibitor-2 (Inh2), protein phosphatase-1 (PP1C), p35, and myosin VI. It phosporylates other…
		NM_177455.3	basic helix-loop-helix family member a15	BHLHA15	Validated	Chr7:98212254-98212959	706
		NM_015395.2	tectonin beta-propeller repeat containing 1	TECPR1	Reviewed	Chr7:98215443-98252251	36809
Chr7_inv2_BP2	Chr7:102471575-102481575	NM_152892.2	leucine-rich repeats and WD repeat domain containing 1, transcript variant 1	LRWD1	Reviewed	Chr7:102464883-102473168	8286
		NM_001317721.1	leucine-rich repeats and WD repeat domain containing 1, transcript variant 2	LRWD1	Reviewed	Chr7:102464883-102473168	8286
		NM_006234.4	polymerase (RNA) II subunit J	POLR2J	Reviewed	Chr7:102473100-102478934	5835
Chr7_inv5_BP2	Chr7:43956659-43966659	NR_003655.3	polymerase (RNA) II subunit J4, pseudogene	POLR2J4	Validated	Chr7:43940895-44019194	78300
Chr7_inv8_BP1	Chr7:72888718-72898718	NM_001257190.2	POM121 transmembrane nucleoporin, transcript variant 1	POM121	Reviewed	Chr7:72879335-72951440	72106	The nuclear envelope creates distinct nuclear and cytoplasmic compartments in eukaryotic cells. It consists of two concentric membranes perforated by nuclear pores, large protein complexes that form aqueous channels to regulate the flow of macromolecules between the nucleus and the cytoplasm. These complexes are composed of at least 100 different polypeptide subunits, many of which belong to the …
		NM_172020.4	POM121 transmembrane nucleoporin, transcript variant 2	POM121	Reviewed	Chr7:72890627-72948304	57678
Chr7_inv12_BP2	Chr7:119793781-119803781	NR_131960.1	liver cancer-associated transcript 5, transcript variant 1	LVCAT5	Validated	Chr7:119619430-119907375	287946
		NR_131962.1	liver cancer-associated transcript 5, transcript variant 3	LVCAT5	Validated	Chr7:119704556-119907375	202820
		NR_131961.1	liver cancer-associated transcript 5, transcript variant 2	LVCAT5	Validated	Chr7:119750809-119907375	156567
		NR_131963.1	liver cancer-associated transcript 5, transcript variant 4	LVCAT5	Validated	Chr7:119786952-119907375	120424
Chr7_inv18_BP1	Chr7:2526298-2536298	NM_001166355.1	LFNG O-fucosylpeptide 3-beta-N-acetylglucosaminyltransferase, transcript variant 3	LFNG	Reviewed	Chr7:2512529-2528429	15901	This gene is a member of the fringe gene family which also includes radical and manic fringe genes. They all encode evolutionarily conserved glycosyltransferases that act in the Notch signaling pathway to define boundaries during embryonic development. While their genomic structure is distinct from other glycosyltransferases, fringe proteins have a fucose-specific beta-1,3-N-acetylglucosaminyltra…
	:-	NM_002304.2	LFNG O-fucosylpeptide 3-beta-N-acetylglucosaminyltransferase, transcript variant 4	LFNG	Reviewed	Chr7:2517863-2528429	10567
	:-	NM_001040167.1	LFNG O-fucosylpeptide 3-beta-N-acetylglucosaminyltransferase, transcript variant 1	LFNG	Reviewed	Chr7:2519845-2528429	8585
	:-	NM_001040168.1	LFNG O-fucosylpeptide 3-beta-N-acetylglucosaminyltransferase, transcript variant 2	LFNG	Reviewed	Chr7:2519845-2529177	9333
	:-	NR_039791.2	microRNA 4648	MIR4648	Provisional	Chr7:2527074-2527145	72
Chr9_inv2_BP2	Chr9:96944325-96954325	NM_001355228.1	major facilitator superfamily domain containing 14C	MFSD14C	Provisional	Chr9:96946045-97013580	67536
Chr10_inv2_BP1	Chr10:50736163-50746163	NR_135904.1	N-acylsphingosine amidohydrolase (non-lysosomal ceramidase) 2B, transcript variant 6	ASAH2B	Validated	Chr10:50739688-50757188	17501
		NM_001321957.1	N-acylsphingosine amidohydrolase (non-lysosomal ceramidase) 2B, transcript variant 2	ASAH2B	Validated	Chr10:50739688-50757188	17501
		NM_001321958.1	N-acylsphingosine amidohydrolase (non-lysosomal ceramidase) 2B, transcript variant 3	ASAH2B	Validated	Chr10:50739688-50757188	17501
		NM_001079516.3	N-acylsphingosine amidohydrolase (non-lysosomal ceramidase) 2B, transcript variant 1	ASAH2B	Validated	Chr10:50739688-50757188	17501
		NM_001321959.1	N-acylsphingosine amidohydrolase (non-lysosomal ceramidase) 2B, transcript variant 4	ASAH2B	Validated	Chr10:50739688-50757188	17501
		NM_001321960.1	N-acylsphingosine amidohydrolase (non-lysosomal ceramidase) 2B, transcript variant 5	ASAH2B	Validated	Chr10:50739688-50757188	17501
Chr11_inv1_BP2	Chr11:71563887-71573887	NM_001012710.1	keratin associated protein 5-10	KRTAP5-10	Validated	Chr11:71565563-71566620	1058
Chr12_inv2_BP2	Chr12:64896919-64906919	NR_033988.1	uncharacterized LOC400046	FLJ41278	Validated	Chr12:64883774-64977522	93749
Chr12_inv1_BP2	Chr12:67982723-67992723	NR_104125.1	IFNG antisense RNA 1, transcript variant 2	IFNG-AS1	Validated	Chr12:67989445-68021327	31883
		NR_104124.1	IFNG antisense RNA 1, transcript variant 1	IFNG-AS1	Validated	Chr12:67989445-68021327	31883
Chr14_inv2_BP1	Chr14:19709886-19719886	NM_001197287.1	olfactory receptor family 11 subfamily H member 2	OR11H2	Inferred	Chr14:19712904-19714332	1429	Olfactory receptors interact with odorant molecules in the nose, to initiate a neuronal response that triggers the perception of a smell. The olfactory receptor proteins are members of a large family of G-protein-coupled receptors (GPCR) arising from single coding-exon genes. Olfactory receptors share a 7-transmembrane domain structure with many neurotransmitter and hormone receptors and are resp…
Chr14_inv2_BP2	Chr14:20143024-20153024	NM_001004724.1	olfactory receptor family 4 subfamily N member 5	OR4N5	Provisional	Chr14:20143736-20144662	927
Chr15_inv1_BP2	Chr15:30401229-30411229	NM_001282484.1	golgin A8 family member R	GOLGA8R	Provisional	Chr15:30400562-30414260	13699
Chr15_inv1_BP1	Chr15:28847754-28857754	NR_037599.1	PDCD6IP pseudogene 2	PDCD6IPP2	Provisional	Chr15:28789834-28856574	66741
	:-	AK302238.1	Homo sapiens cDNA FLJ59069 complete cds, weakly similar to Golgin subfamily A member 6	GOLGA6L7	Validated	Chr15:28844961-28848675	3715
Chr16_inv1_BP2	Chr16:74322699-74332699	NR_026950.1	pyruvate dehydrogenase phosphatase regulatory subunit pseudogene	LOC283922	Validated	Chr16:74332406-74368255	35850
Chr16_inv3_BP1	Chr16:28373167-28383167	NM_001317856.1	eukaryotic translation initiation factor 3 subunit C-like, transcript variant 2	EIF3CL	Reviewed	Chr16:28379581-28403885	24305
	:-	NM_001099661.2	eukaryotic translation initiation factor 3 subunit C-like, transcript variant 3	EIF3CL	Reviewed	Chr16:28379581-28403885	24305
	:-	NM_001317857.1	eukaryotic translation initiation factor 3 subunit C-like, transcript variant 1	EIF3CL	Reviewed	Chr16:28379581-28403885	24305
Chr16_inv3_inv8_BP2	Chr16:30205335-30215335	NR_002557.1	SAGA complex associated factor 29 pseudogene	LOC613038	Provisional	Chr16:30204316-30206927	2612
Chr16_inv10_BP1	Chr16:31007037-31017037	NM_052874.4	syntaxin 1B	STX1B	Reviewed	Chr16:30989256-31010638	21383
Chr17_inv2_BP1	Chr17:47473620-47483620	NR_033934.1	mitochondrial ribosomal protein L45 pseudogene 2	MRPL45P2	Validated	Chr17:47450227-47492620	42394
Chr17_inv2_BP2	Chr17:62165250-62384187	NR_027486.1	TBC1 domain family member 3 pseudogene 2	TBC1D3P2	Provisional	Chr17:62264705-62275655	10951
	chr17:62165250-62384187	NM_001144933.1	EF-hand calcium binding domain 3, transcript variant 1	EFCAB3	Validated	Chr17:62370218-62416479	46262
	chr17:62165250-62384187	NM_173503.3	EF-hand calcium binding domain 3, transcript variant 2	EFCAB3	Validated	Chr17:62380553-62416479	35927
Chr17_inv4_BP1	Chr17:15807020-15817020	NR_110839.1	uncharacterized LOC101928567	LOC101928567	Validated	Chr17:15806242-15817742	11501
Chr17_inv7_BP1	Chr17:3059892-3069892	NM_014566.1	olfactory receptor family 1 subfamily D member 5	OR1D5	Validated	Chr17:3062669-3063607	939	Olfactory receptors interact with odorant molecules in the nose, to initiate a neuronal response that triggers the perception of a smell. The olfactory receptor proteins are members of a large family of G-protein-coupled receptors (GPCR) arising from single coding-exon genes. Olfactory receptors share a 7-transmembrane domain structure with many neurotransmitter and hormone receptors and are resp…
Chr17_inv7_BP2	Chr17:3212165-3222165	NM_014565.2	olfactory receptor family 1 subfamily A member 1	OR1A1	Validated	Chr17:3215621-3216550	930
Chr18_inv1_BP1	Chr18:107546-117546	NR_033770.1	Rho associated coiled-coil containing protein kinase 1 pseudogene 1	ROCK1P1	Validated	Chr18:109065-122219	13155
		NR_107045.1	microRNA 8078	MIR8078	Provisional	Chr18:112256-112339	84
Chr18_inv1_BP2	Chr18:21435479-21445479	NM_001142966.2	growth regulation by estrogen in breast cancer-like	GREB1L	Provisional	Chr18:21242242-21522830	280589
Chr19_inv2_BP1	Chr19:36326795-36336795	NR_038279.1	long intergenic non-protein coding RNA 665, transcript variant 2	LINC00665	Validated	Chr19:36313061-36331718	18658
	:-	NR_038278.1	long intergenic non-protein coding RNA 665, transcript variant 1	LINC00665	Validated	Chr19:36319716-36331718	12003
	:-	NM_001297619.1	ZFP14 zinc finger protein, transcript variant 1	ZFP14	Validated	Chr19:36334453-36379203	44751
	:-	NM_020917.2	ZFP14 zinc finger protein, transcript variant 2	ZFP14	Validated	Chr19:36334453-36379203	44751
Chr19_inv2_BP2	Chr19:37246831-37256831	NR_110718.1	long intergenic non-protein coding RNA 1535, transcript variant 1	LINC01535	Validated	Chr19:37251885-37263613	11729
	:-	NR_110719.1	long intergenic non-protein coding RNA 1535, transcript variant 2	LINC01535	Validated	Chr19:37251885-37265535	13651
	:-	NR_110720.1	long intergenic non-protein coding RNA 1535, transcript variant 3	LINC01535	Validated	Chr19:37251885-37265535	13651
Chr20_inv1_BP2	Chr20:28231904-30199893	NR_132315.1	FSHD region gene 1 family member C, pseudogene	FRG1CP	Inferred	Chr20:28580633-28602665	22033
	:-	NR_132316.1	FSHD region gene 1 family member D, pseudogene	FRG1DP	Inferred	Chr20:29080390-29096832	16443
	:-	NR_037925.1	FSHD region gene 2 family member E, pseudogene	FRG2EP	Provisional	Chr20:29414075-29416961	2887
	:-	NR_134504.1	uncharacterized LOC105379477	LOC105379477	Validated	Chr20:29448517-29458181	9665
	:-	NR_133643.1	long intergenic non-protein coding RNA 1598	LINC01598	Validated	Chr20:29548719-29560475	11757
Chr20_inv2_BP2	Chr20:5535425-5545425	NM_019593.3	glycerophosphocholine phosphodiesterase 1	GPCPD1	Validated	Chr20:5544434-5611026	66593
All human (RefSeq curated) genes spanning the breakpoints of the analyzed inversion calls.
